# Supplementary material for: Silver-catalyzed C-3 arylthiodifluoromethylation and aryloxydifluoromethylation of coumarins
Source: Royal Society of Chemistry journal article supplement (doi:10.1039/d2ob00568a), 2022-01-01

# Supporting information

## **Silver-catalyzed C3 Arylthiodifluoromethylation and Aryloxydifluoromethylation of Coumarins**

Jie Sun, Ziwei Li, Xiaoxiao Huang, Zhiwei Ke, Zhiwei Chen\*

*College of Pharmaceutical Sciences, Zhejiang University of Technology, Hangzhou*

*310014, P.R. China.*

\*Email: [chenzhiwei@zjut.edu.cn](mailto:chenzhiwei@zjut.edu.cn)

### **Table of contents**

|                                                                                 |     |
|---------------------------------------------------------------------------------|-----|
| 1. General information                                                          | S2  |
| 2. General procedure                                                            | S2  |
| 3. References                                                                   | S4  |
| 4. Analytical data of the synthesized derivatives                               | S5  |
| 5. <sup>1</sup> H NMR, <sup>13</sup> C NMR and <sup>19</sup> F NMR of compounds | S19 |
| 6. The HRMS spectra for Compound <b>8</b>                                       | S72 |

## 1. General information

All reagents were obtained from commercial sources and used without further purification unless otherwise indicated. The starting materials and **2n** were purchased from Aladdin (<https://www.aladdin-e.com/>). Silica gel for column chromatography was purchased from Qingdao Haiyang Chemical Co., Ltd. Reactions were stirred using Teflon-coated magnetic stir bars. Thin-layer chromatography (TLC) was used to monitor the reaction. Melting points were determined using a Büchi B-540 capillary melting point apparatus.  $^1\text{H}$  NMR (400/600 MHz),  $^{13}\text{C}$  NMR (100/150 MHz) and  $^{19}\text{F}$  NMR (376/565 MHz) spectra were recorded with  $\text{CDCl}_3$ . Chemical shifts are reported downfield from TMS ( $=0$ ) for  $^1\text{H}$  NMR. For  $^{13}\text{C}\{^1\text{H}\}$  NMR, chemical shifts are reported in the scale relative to  $\text{CDCl}_3$  ( $=77.0$ ). High resolution mass spectrometry (HRMS) analysis was performed on an Agilent 1290–6540 UHPLC Q-ToF HR-MS System (ESI) spectrometer.

### 2.1 General procedure for the synthesis of products **1**<sup>1</sup>

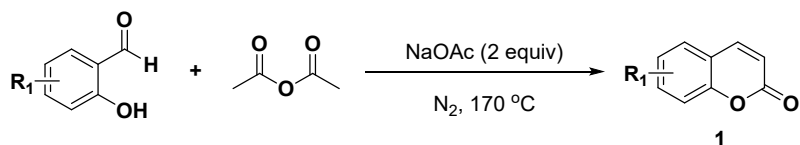

Under nitrogen, add the appropriate salicylaldehyde (8.00 mmol), acetic anhydride (1.51 mL, 16 mmol) and sodium acetate (1.31 g, 16 mmol) to a 10 ml sealed tube in sequence. The resulting mixture was heated to 170 °C and then stirred for 6 h. After cooling, the reaction mixture was quenched with water (15 mL) and extracted with  $\text{CH}_2\text{Cl}_2$  ( $2 \times 15$  mL). The organic layer was washed with brine ( $2 \times 20$  mL), dried over  $\text{Na}_2\text{SO}_4$ , and concentrated under reduced pressure. The residue was purified by flash column chromatography with *n*-hexane/ EtOAc (10/1 to 3/1, v/v) to afford coumarins **1**.

### 2.2 General procedure for the synthesis of products **2/4**<sup>2</sup>

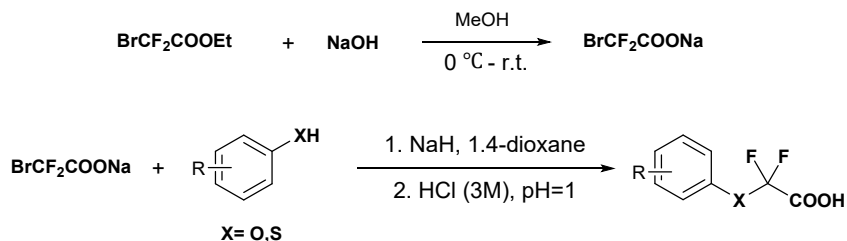

To a 250 mL oven-dried round-bottom flask equipped with a stir bar were added sodium hydroxide (4.0 g, 100.0 mmol) and MeOH (100 mL). Then, BrCF<sub>2</sub>CO<sub>2</sub>Et (20.3 g, 100.0 mmol) was added to the resulting solution at 0 °C. Upon addition, the mixture was warmed to room temperature and stirred for 24 h. The solvent was evaporated under vacuum and the residue was further dried under reduced pressure to give BrCF<sub>2</sub>CO<sub>2</sub>Na as a white solid (19.0 g, 97%) .

To a 100 mL oven-dried Schlenk tube equipped with a stir bar was added thiophenol (or phenol) (20.0 mmol, 1.0 equiv.) under N<sub>2</sub> atmosphere. 1,4-Dioxane (30.0 mL) was added to dissolve the phenol or thiophenol. Then, NaH (60% purity) (880 mg, 22.0 mmol, 1.1 equiv.) and 1,4-dioxane (5.0 mL) were added under N<sub>2</sub> atmosphere. The solution was stirred at room temperature for 30 min. Then BrCF<sub>2</sub>COONa (4.3 g, 22.0 mmol, 1.1 equiv.) and 1,4-dioxane (5.0 mL) were added. After the mixture was heated at 60-70 °C in an oil bath for hours (monitor by TLC), then the mixture was cooled down to room temperature and acidified with 3M HCl (aq.) to pH = 1. The mixture was extracted with ethyl acetate for three times. The combined organic phase was washed by saturated brines and dried over Na<sub>2</sub>SO<sub>4</sub>. After the solution was filtered and the solvent was evaporated under vacuum, the crude product was purified by flash column chromatography (n-hexane/ethyl acetate = 5:1, v/v) to give the product **2** or **4**.

### 2.3 Screening condition supplement:

**Table 1.** Optimization of reaction conditions of coumarin and arylthiodifluoroacetic acid<sup>a</sup>

| 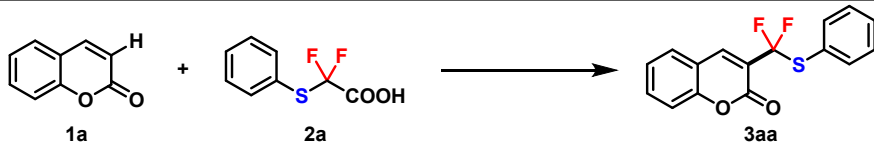 |                   |                                              |                  |        |          |                        |
|--------------------------------------------------------------------------------------|-------------------|----------------------------------------------|------------------|--------|----------|------------------------|
| Entry                                                                                | Catalyst          | Oxidant                                      | Solvents         | T (°C) | Time (h) | Yield (%) <sup>b</sup> |
| 1                                                                                    | [Fe]              | K <sub>2</sub> S <sub>2</sub> O <sub>8</sub> | H <sub>2</sub> O | 60     | 22       | trace/n.r.             |
| 2                                                                                    | [Cu]              | K <sub>2</sub> S <sub>2</sub> O <sub>8</sub> | H <sub>2</sub> O | 60     | 22       | trace/n.r.             |
| 3                                                                                    | AgNO <sub>3</sub> | K <sub>2</sub> S <sub>2</sub> O <sub>8</sub> | H <sub>2</sub> O | 60     | 22       | 15                     |
| 4                                                                                    | AgOAc             | K <sub>2</sub> S <sub>2</sub> O <sub>8</sub> | H <sub>2</sub> O | 60     | 22       | trace                  |
| 5                                                                                    | Ag <sub>2</sub> O | K <sub>2</sub> S <sub>2</sub> O <sub>8</sub> | H <sub>2</sub> O | 60     | 22       | trace                  |
| 6                                                                                    | AgOTf             | K <sub>2</sub> S <sub>2</sub> O <sub>8</sub> | H <sub>2</sub> O | 60     | 22       | trace                  |

|                 |                                     |                                                               |                                              |           |           |           |
|-----------------|-------------------------------------|---------------------------------------------------------------|----------------------------------------------|-----------|-----------|-----------|
| 7               | Ag <sub>2</sub> CO <sub>3</sub>     | K <sub>2</sub> S <sub>2</sub> O <sub>8</sub>                  | H <sub>2</sub> O                             | 60        | 22        | 23        |
| 8               | Ag <sub>2</sub> CO <sub>3</sub>     | (NH <sub>4</sub> ) <sub>2</sub> S <sub>2</sub> O <sub>8</sub> | H <sub>2</sub> O                             | 60        | 22        | trace     |
| 9               | Ag <sub>2</sub> CO <sub>3</sub>     | Na <sub>2</sub> S <sub>2</sub> O <sub>8</sub>                 | H <sub>2</sub> O                             | 60        | 22        | 15        |
| 10              | Ag <sub>2</sub> CO <sub>3</sub>     | Selectfluor                                                   | H <sub>2</sub> O                             | 60        | 22        | 0         |
| 11              | Ag <sub>2</sub> CO <sub>3</sub>     | -                                                             | H <sub>2</sub> O                             | 60        | 22        | 0         |
| 12              | Ag <sub>2</sub> CO <sub>3</sub>     | K <sub>2</sub> S <sub>2</sub> O <sub>8</sub>                  | DCE/H <sub>2</sub> O (1:2)                   | 60        | 22        | trace     |
| 13              | Ag <sub>2</sub> CO <sub>3</sub>     | K <sub>2</sub> S <sub>2</sub> O <sub>8</sub>                  | DMSO/H <sub>2</sub> O (1:2)                  | 60        | 22        | n.r.      |
| 14              | Ag <sub>2</sub> CO <sub>3</sub>     | K <sub>2</sub> S <sub>2</sub> O <sub>8</sub>                  | 1,4-dioxane/H <sub>2</sub> O (1:2)           | 60        | 22        | n.r.      |
| 15              | Ag <sub>2</sub> CO <sub>3</sub>     | K <sub>2</sub> S <sub>2</sub> O <sub>8</sub>                  | THF/H <sub>2</sub> O (1:2)                   | 60        | 22        | n.r.      |
| 16              | Ag <sub>2</sub> CO <sub>3</sub>     | K <sub>2</sub> S <sub>2</sub> O <sub>8</sub>                  | CH <sub>3</sub> CN/H <sub>2</sub> O (1:2)    | 60        | 22        | 28        |
| 17              | Ag <sub>2</sub> CO <sub>3</sub>     | K <sub>2</sub> S <sub>2</sub> O <sub>8</sub>                  | CH <sub>3</sub> CN/H <sub>2</sub> O (1:2)    | 50        | 22        | 36        |
| 18              | Ag <sub>2</sub> CO <sub>3</sub>     | K <sub>2</sub> S <sub>2</sub> O <sub>8</sub>                  | CH <sub>3</sub> CN/H <sub>2</sub> O (1:1)    | 50        | 22        | 43        |
| 19              | Ag <sub>2</sub> CO <sub>3</sub>     | K <sub>2</sub> S <sub>2</sub> O <sub>8</sub>                  | CH <sub>3</sub> CN/H <sub>2</sub> O (2:1)    | 50        | 22        | 28        |
| <b>20</b>       | <b>Ag<sub>2</sub>CO<sub>3</sub></b> | <b>K<sub>2</sub>S<sub>2</sub>O<sub>8</sub></b>                | <b>CH<sub>3</sub>CN/H<sub>2</sub>O (1:1)</b> | <b>40</b> | <b>22</b> | <b>60</b> |
| 21              | Ag <sub>2</sub> CO <sub>3</sub>     | K <sub>2</sub> S <sub>2</sub> O <sub>8</sub>                  | CH <sub>3</sub> CN/H <sub>2</sub> O (1:1)    | 40        | 24        | 58        |
| 22              | Ag <sub>2</sub> CO <sub>3</sub>     | K <sub>2</sub> S <sub>2</sub> O <sub>8</sub>                  | CH <sub>3</sub> CN/H <sub>2</sub> O (1:1)    | 30        | 22        | trace     |
| 23 <sup>c</sup> | Ag <sub>2</sub> CO <sub>3</sub>     | K <sub>2</sub> S <sub>2</sub> O <sub>8</sub>                  | CH <sub>3</sub> CN/H <sub>2</sub> O (1:1)    | 40        | 22        | 55        |
| 24              | -                                   | K <sub>2</sub> S <sub>2</sub> O <sub>8</sub>                  | CH <sub>3</sub> CN/H <sub>2</sub> O (1:1)    | 40        | 22        | trace     |

<sup>a</sup>Conditions: coumarin **1a** (0.4 mmol, 58 mg), arylthiodifluoroacetic acid **2a** (0.8 mmol, 163 mg), Catalyst (0.2 equiv.), oxidant (3 equiv.) and solvent (3.0 mL) at T °C for 22 h under N<sub>2</sub> atmosphere, <sup>b</sup>Isolated yield, <sup>c</sup>[Fe]= Fe salt, <sup>d</sup>[Cu]= Cu salt, <sup>e</sup>Under air.

### 3. References

- 1 a) Jin, C.; Yan, Z.; Sun, B.; Yang, J. Visible-Light-Induced Regioselective Alkylation of Coumarins via Decarboxylative Coupling with *N*-Hydroxyphthalimide Esters. *Org. Lett.* **2019**, *21*, 2064–2068. (b) Wei, J.; Wang, P.; Jia, Q.; Huang J.; Du, Z.; Zhang, K.; Wang, J. Amine-Catalyzed Cascade Synthesis of 3,4-Diunsubstituted Coumarins. *Eur. J. Org. Chem.* **2013**, 2013, 4499–4502.
- 2 a) X.-L. Zhu, Y. Huang, X.-H. Xu and F.-L. Qing, Silver-Catalyzed C–H Aryloxydifluoromethylation and Arylthiodifluoromethylation of Heteroarenes, *Org. Lett.*, 2020, **22**, 5451-5455. b) M. Zhou, C. Ni, Z. He and J. Hu, O-Trifluoromethylation of Phenols: Access to Aryl Trifluoromethyl Ethers by O-Carboxydifluoromethylation and Decarboxylative Fluorination, *Org. Lett.*, 2016, **18**, 3754-3757.

#### 4. Analytical data of the synthesized derivatives

##### 3-(difluoro(phenylthio)methyl)-2H-chromen-2-one (3aa)

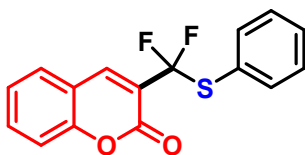

Brown solid; m.p.= 120.0-121.9 °C; 60% yield; <sup>1</sup>H NMR (600 MHz, CDCl<sub>3</sub>) δ 7.78 (s, 1H), 7.64 (d, *J* = 7.2 Hz, 2H), 7.60 (t, *J* = 8.0 Hz, 1H), 7.48 (d, *J* = 7.8 Hz, 1H), 7.40 (t, *J* = 7.4 Hz, 1H), 7.35 (t, *J* = 7.6 Hz, 3H), 7.31 (t, *J* = 7.6 Hz, 1H). <sup>13</sup>C NMR (151 MHz, CDCl<sub>3</sub>) δ 156.4, 154.3, 141.5 (t, <sup>3</sup>*J*<sub>C-F</sub> = 6.0 Hz), 136.7, 133.5, 130.2, 129.2, 129.1, 126.6, 124.9, 124.5 (t, <sup>1</sup>*J*<sub>C-F</sub> = 280.8 Hz), 122.4 (t, <sup>2</sup>*J*<sub>C-F</sub> = 27.2 Hz), 117.3, 116.7. <sup>19</sup>F NMR (565 MHz, CDCl<sub>3</sub>) δ -74.7 (s, 2F). HRMS-ESI (*m/z*): calcd for C<sub>16</sub>H<sub>10</sub>F<sub>2</sub>NaO<sub>2</sub>S<sup>+</sup> [M+Na]<sup>+</sup> 327.0262, found 327.0261.

##### 3-(difluoro(phenylthio)methyl)-6-methyl-2H-chromen-2-one (3ba)

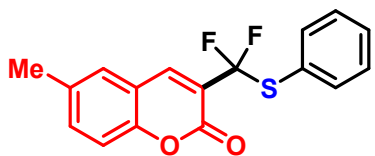

Yellow liquid; 47% yield; <sup>1</sup>H NMR (400 MHz, CDCl<sub>3</sub>) δ 7.73 (s, 1H), 7.64 (d, *J* = 7.0 Hz, 2H), 7.45 – 7.38 (m, 2H), 7.35 (t, *J* = 7.2 Hz, 2H), 7.26 (d, *J* = 1.6 Hz, 2H), 2.40 (s, 3H). <sup>13</sup>C NMR (101 MHz, CDCl<sub>3</sub>) δ 156.7, 152.5, 141.6 (t, <sup>3</sup>*J*<sub>C-F</sub> = 6.0 Hz), 136.8, 135.8, 134.7, 134.6, 130.2, 129.3, 129.1, 128.8, 122.2 (t, <sup>2</sup>*J*<sub>C-F</sub> = 27.2 Hz), 117.1, 116.4, 20.7. <sup>19</sup>F NMR (376 MHz, CDCl<sub>3</sub>) δ -74.6 (s, 2F). HRMS-ESI (*m/z*): calcd for C<sub>17</sub>H<sub>13</sub>F<sub>2</sub>O<sub>2</sub>S<sup>+</sup> [M+H]<sup>+</sup> 319.0599, found 319.0602.

##### 3-(difluoro(phenylthio)methyl)-6-methoxy-2H-chromen-2-one (3ca)

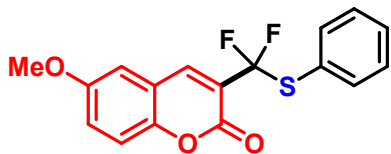

Yellow solid; m.p.= 132.0-135.0 °C; 39% yield; <sup>1</sup>H NMR (600 MHz, CDCl<sub>3</sub>) δ 7.75 (s, 1H), 7.64 (d, *J* = 7.2 Hz, 2H), 7.35 (t, *J* = 7.4 Hz, 3H), 7.31 – 7.27 (m, 2H), 7.18 (dd, *J* = 9.0, 3.0 Hz, 1H), 3.84 (s, 3H). <sup>13</sup>C NMR (151 MHz, CDCl<sub>3</sub>) δ 156.7, 156.3, 148.8, 141.4 (t, <sup>3</sup>*J*<sub>C-F</sub> = 6.0 Hz), 136.8, 135.8, 130.2, 129.3, 129.1, 121.5 (t,

$^1J_{\text{C-F}} = 280.8 \text{ Hz}$ ), 120.4 (t,  $^2J_{\text{C-F}} = 27.2 \text{ Hz}$ ), 118.4, 117.8, 110.7, 55.9.  $^{19}\text{F}$  NMR (565 MHz,  $\text{CDCl}_3$ )  $\delta$  -74.7 (s, 2F).

HRMS-ESI (m/z): calcd for  $\text{C}_{17}\text{H}_{13}\text{F}_2\text{O}_3\text{S}^+ [\text{M}+\text{H}]^+$  335.0548, found 335.0550.

**6-chloro-3-(difluoro(phenylthio)methyl)-2H-chromen-2-one (3da)**

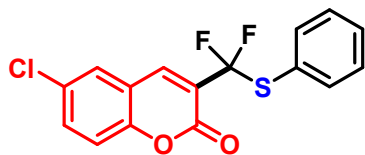

White solid; m.p.= 115.4-117.6 °C; 72% yield;  $^1\text{H}$  NMR (400 MHz,  $\text{CDCl}_3$ )  $\delta$  7.68 (s, 1H), 7.62 (d,  $J = 7.2 \text{ Hz}$ , 2H), 7.55 (dd,  $J = 8.8, 2.6 \text{ Hz}$ , 1H), 7.48 – 7.37 (m, 2H), 7.35 (t,  $J = 7.2 \text{ Hz}$ , 2H), 7.31 (d,  $J = 8.8 \text{ Hz}$ , 1H).  $^{13}\text{C}$  NMR (101 MHz,  $\text{CDCl}_3$ )  $\delta$  155.7, 152.6, 140.2 (t,  $^3J_{\text{C-F}} = 6.0 \text{ Hz}$ ), 136.8, 130.4, 130.2, 129.2, 128.2, 127.1, 126.3, 124.3 (t,  $^1J_{\text{C-F}} = 280.8 \text{ Hz}$ ), 123.5 (t,  $^2J_{\text{C-F}} = 27.2 \text{ Hz}$ ), 118.3, 118.2.  $^{19}\text{F}$  NMR (376 MHz,  $\text{CDCl}_3$ )  $\delta$  -75.1 (s, 2F).

HRMS-ESI (m/z): calcd for  $\text{C}_{16}\text{H}_{10}\text{ClF}_2\text{O}_2\text{S}^+ [\text{M}+\text{H}]^+$  339.0053, found 339.0050.

**6-bromo-3-(difluoro(phenylthio)methyl)-2H-chromen-2-one (3ea)**

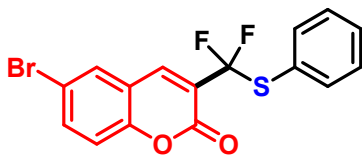

Yellow solid; m.p.= 122.7-125.2 °C; 65% yield;  $^1\text{H}$  NMR (400 MHz,  $\text{CDCl}_3$ )  $\delta$  7.68 (s, 2H), 7.65 – 7.57 (m, 3H), 7.45 – 7.37 (m, 1H), 7.40 – 7.30 (m, 2H), 7.26 (d,  $J = 3.5 \text{ Hz}$ , 1H).  $^{13}\text{C}$  NMR (101 MHz,  $\text{CDCl}_3$ )  $\delta$  155.7 (t,  $^3J_{\text{C-F}} = 3.0 \text{ Hz}$ ), 153.1, 140.2, 136.8, 136.2, 131.2, 130.4, 129.2, 126.3, 124.3 (t,  $^1J_{\text{C-F}} = 281.8 \text{ Hz}$ ), 123.5 (t,  $^2J_{\text{C-F}} = 27.2 \text{ Hz}$ ), 118.8, 118.5, 117.4.  $^{19}\text{F}$  NMR (376 MHz,  $\text{CDCl}_3$ )  $\delta$  -75.1 (s, 2F).

HRMS-ESI (m/z): calcd for  $\text{C}_{16}\text{H}_{10}\text{BrF}_2\text{O}_2\text{S}^+ [\text{M}+\text{H}]^+$  382.9547, found 382.9551.

**3-(difluoro(phenylthio)methyl)-6-fluoro-2H-chromen-2-one (3fa)**

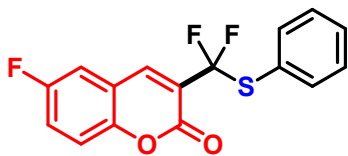

White solid; m.p.= 116.5-118.0 °C; 75% yield;  $^1\text{H}$  NMR (400 MHz,  $\text{CDCl}_3$ )  $\delta$  7.71 (s, 1H), 7.63 (d,  $J = 7.2 \text{ Hz}$ , 2H), 7.42 (t,  $J = 7.4 \text{ Hz}$ , 1H), 7.40

– 7.30 (m, 4H), 7.17 (dd,  $J = 7.6, 2.6$  Hz, 1H).  $^{13}\text{C}$  NMR (101 MHz,  $\text{CDCl}_3$ )  $\delta$  160.0, 157.5, 156.0, 150.5, 140.5 (q,  $^3J_{\text{C-F}} = 3.6$  Hz), 136.8, 130.3, 129.2, 126.3, 124.3 (t,  $^1J_{\text{C-F}} = 280.8$  Hz), 123.6 (t,  $^2J_{\text{C-F}} = 27.2$  Hz), 121.1 (d,  $^2J = 24.6$  Hz), 118.4 (d,  $^3J = 8.4$  Hz), 114.20 (d,  $^2J = 24.0$  Hz).  $^{19}\text{F}$  NMR (376 MHz,  $\text{CDCl}_3$ )  $\delta$  -75.2 (s, 2F), -116.2 (s, 1F). HRMS-ESI ( $m/z$ ): calcd for  $\text{C}_{16}\text{H}_{10}\text{F}_3\text{O}_2\text{S}^+ [\text{M}+\text{H}]^+$  323.0348, found 323.0352.

**7-chloro-3-(difluoro(phenylthio)methyl)-2H-chromen-2-one (3ga)**

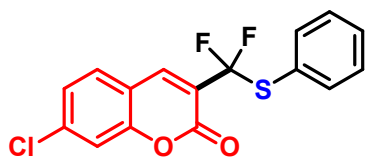

White solid; m.p.= 155.9-158.1 °C; 54% yield;  $^1\text{H}$  NMR (400 MHz,  $\text{CDCl}_3$ )  $\delta$  7.73 (s, 1H), 7.62 (d,  $J = 7.0$  Hz, 2H), 7.43 – 7.39 (m, 2H), 7.36 (d,  $J = 8.0$  Hz, 3H), 7.28 (dd,  $J = 8.4, 2.0$  Hz, 1H).  $^{13}\text{C}$  NMR (101 MHz,  $\text{CDCl}_3$ )  $\delta$  155.7, 154.5, 140.7 (t,  $^3J_{\text{C-F}} = 7.0$  Hz), 139.7, 136.8, 130.3, 129.9, 129.2, 126.4, 125.6, 124.4, 122.3 (t,  $^1J_{\text{C-F}} = 280.8$  Hz), 117.1, 115.9.  $^{19}\text{F}$  NMR (376 MHz,  $\text{CDCl}_3$ )  $\delta$  -74.9 (s, 2F). HRMS-ESI ( $m/z$ ): calcd for  $\text{C}_{16}\text{H}_{12}\text{ClF}_2\text{O}_2\text{S}^+ [\text{M}+\text{H}]^+$  339.0053, found 339.0056.

**8-chloro-3-(difluoro(phenylthio)methyl)-2H-chromen-2-one (3ha)**

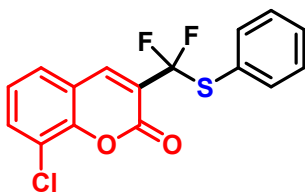

Yellow solid; m.p.= 138.3-140.6 °C; 50% yield;  $^1\text{H}$  NMR (400 MHz,  $\text{CDCl}_3$ )  $\delta$  7.74 (s, 1H), 7.64 (dd,  $J = 11.2, 7.6$  Hz, 3H), 7.46 – 7.31 (m, 4H), 7.26 (t,  $J = 4.0$  Hz, 1H).  $^{13}\text{C}$  NMR (101 MHz,  $\text{CDCl}_3$ )  $\delta$  155.2, 150.0, 141.1 (t,  $^3J_{\text{C-F}} = 6.0$  Hz), 136.8, 133.7, 130.3, 129.2, 127.5, 126.3, 125.1, 123.2 (t,  $^2J_{\text{C-F}} = 27.2$  Hz), 121.7 (t,  $^1J_{\text{C-F}} = 280.8$  Hz), 119.0, 118.5.  $^{19}\text{F}$  NMR (376 MHz,  $\text{CDCl}_3$ )  $\delta$  -75.0 (s, 2F). HRMS-ESI ( $m/z$ ): calcd for  $\text{C}_{16}\text{H}_{12}\text{ClF}_2\text{O}_2\text{S}^+ [\text{M}+\text{H}]^+$  339.0053, found 339.0058.

**6,8-dichloro-3-(difluoro(phenylthio)methyl)-2H-chromen-2-one (3ia)**

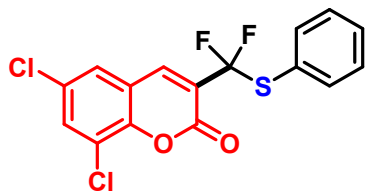

White solid; m.p.= 151.1-153.2°C; 51% yield;  $^1\text{H}$  NMR (400 MHz,  $\text{CDCl}_3$ )  $\delta$  7.66 – 7.59 (m, 4H), 7.43 (t,  $J$  = 7.4 Hz, 1H), 7.39 – 7.33 (m, 3H).  $^{13}\text{C}$  NMR (101 MHz,  $\text{CDCl}_3$ )  $\delta$  154.5, 148.6, 139.8 (t,  $^3J_{\text{C-F}}$  = 6.0 Hz), 136.8, 133.3, 130.5, 130.0, 129.2, 126.7, 126.2, 124.3 (t,  $^2J_{\text{C-F}}$  = 27.2 Hz), 124.1 (t,  $^1J_{\text{C-F}}$  = 280.8 Hz), 122.7, 119.1.  $^{19}\text{F}$  NMR (376 MHz,  $\text{CDCl}_3$ )  $\delta$  -75.4 (s, 2F).  
HRMS-ESI (m/z): calcd for  $\text{C}_{16}\text{H}_9\text{Cl}_2\text{F}_2\text{O}_2\text{S}^+ [\text{M}+\text{H}]^+$  372.9663, found 372.9660.

### 6,8-dibromo-3-(difluoro(phenylthio)methyl)-2H-chromen-2-one (3ja)

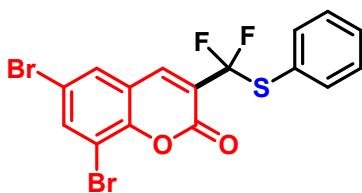

White solid; m.p.= 169.9-172.1 °C; 48% yield;  $^1\text{H}$  NMR (400 MHz,  $\text{CDCl}_3$ )  $\delta$  7.93 (s, 1H), 7.61 (d,  $J$  = 5.2 Hz, 3H), 7.55 (d,  $J$  = 2.2 Hz, 1H), 7.43 (t,  $J$  = 6.8 Hz, 1H), 7.36 (t,  $J$  = 8.0 Hz, 2H).  $^{13}\text{C}$  NMR (101 MHz,  $\text{CDCl}_3$ )  $\delta$  154.6, 150.1, 139.7, 138.8, 136.8, 130.5, 130.4, 129.2, 126.2, 124.3 (t,  $^1J_{\text{C-F}}$  = 281.8 Hz), 124.0, 119.5, 117.3, 111.3.  $^{19}\text{F}$  NMR (376 MHz,  $\text{CDCl}_3$ )  $\delta$  -75.3 (s, 2F).  
HRMS-ESI (m/z): calcd for  $\text{C}_{16}\text{H}_9\text{Br}_2\text{F}_2\text{O}_2\text{S}^+ [\text{M}+\text{H}]^+$  460.8653, found 460.8655.

### 3-(difluoro(phenylthio)methyl)-6-nitro-2H-chromen-2-one (3ka)

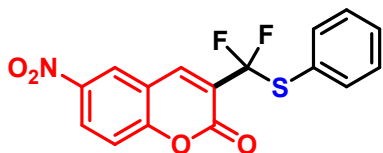

Yellow solid; m.p.= 115.4-117.7 °C; 37% yield;  $^1\text{H}$  NMR (600 MHz,  $\text{CDCl}_3$ )  $\delta$  8.46 (dd,  $J$  = 9.0, 2.6 Hz, 1H), 8.42 (d,  $J$  = 2.6 Hz, 1H), 7.82 (s, 1H), 7.62 (d,  $J$  = 7.2 Hz, 2H), 7.51 (d,  $J$  = 9.0 Hz, 1H), 7.46 – 7.41 (m, 1H), 7.37 (t,  $J$  = 7.6 Hz, 2H).  $^{13}\text{C}$  NMR (151 MHz,  $\text{CDCl}_3$ )  $\delta$  157.5, 154.7 (t,  $^3J_{\text{C-F}}$  = 3.0 Hz), 144.3, 140.1 (t,  $^2J_{\text{C-F}}$  = 6.0 Hz), 136.8, 130.6, 129.3, 128.0, 126.0, 124.8, 124.7, 124.0 (t,  $^1J_{\text{C-F}}$  = 280.8 Hz), 118.0, 117.3.  $^{19}\text{F}$  NMR (565 MHz,  $\text{CDCl}_3$ )  $\delta$  -75.6 (s, 2F).  
HRMS-ESI (m/z): calcd for  $\text{C}_{16}\text{H}_{10}\text{F}_2\text{NO}_4\text{S}^+ [\text{M}+\text{H}]^+$  350.0293, found 350.0299.

### 3-(difluoro(phenylthio)methyl)quinoxalin-2(1H)-one (3la)

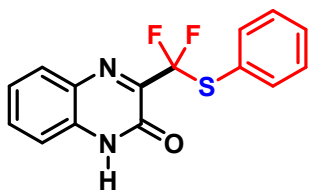

White solid; m.p.= 183.2-186.1 °C; 61% yield; <sup>1</sup>H NMR (600 MHz, DMSO) δ 12.92 (s, 1H), 7.80 (d, *J* = 8.2 Hz, 1H), 7.65 (t, *J* = 7.8 Hz, 1H), 7.61 (d, *J* = 7.0 Hz, 2H), 7.53 – 7.47 (m, 1H), 7.44 (t, *J* = 7.4 Hz, 2H), 7.39 – 7.31 (m, 2H). <sup>13</sup>C NMR (151 MHz, DMSO) δ 151.4, 148.5 (t, <sup>2</sup>*J*<sub>C-F</sub> = 25.6 Hz), 136.4, 133.3, 132.8, 130.3, 129.8, 129.5, 129.3, 125.8 (t, <sup>1</sup>*J*<sub>C-F</sub> = 246.4 Hz), 123.9, 123.0, 115.6. <sup>19</sup>F NMR (565 MHz, DMSO) δ -75.6 (s, 2F).

HRMS-ESI (*m/z*): calcd for C<sub>15</sub>H<sub>11</sub>F<sub>2</sub>N<sub>2</sub>OS<sup>+</sup> [M+H]<sup>+</sup> 305.0555, found 305.0560.

### 3-(difluoro(phenylthio)methyl)-1-methylquinoxalin-2(1H)-one (3ma)

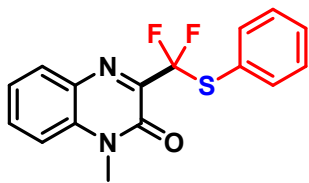

Yellow solid; m.p.= 111.7-113.9 °C; 66% yield; <sup>1</sup>H NMR (600 MHz, CDCl<sub>3</sub>) δ 7.93 (dd, *J* = 8.0, 1.6 Hz, 1H), 7.73 – 7.62 (m, 3H), 7.45 – 7.39 (m, 2H), 7.39 – 7.34 (m, 3H), 3.74 (s, 1H). <sup>13</sup>C NMR (151 MHz, CDCl<sub>3</sub>) δ 151.6, 148.3 (t, <sup>2</sup>*J*<sub>C-F</sub> = 25.6 Hz), 136.9, 134.2, 132.7, 131.4, 130.9, 129.9, 128.9, 126.2, 124.6 (t, <sup>1</sup>*J*<sub>C-F</sub> = 282.4 Hz), 124.2, 113.8, 29.1. <sup>19</sup>F NMR (565 MHz, CDCl<sub>3</sub>) δ -77.2 (s, 2F).

HRMS-ESI (*m/z*): calcd for C<sub>16</sub>H<sub>12</sub>F<sub>2</sub>N<sub>2</sub>OS<sup>+</sup> [M+H]<sup>+</sup> 319.0711, found 319.0719.

### 3-(difluoro(phenylthio)methyl)-8-methoxy-2H-chromen-2-one (3na)

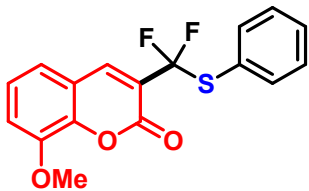

Yellow solid; m.p.= 111.5-113.7 °C; 44% yield; <sup>1</sup>H NMR (400 MHz, DMSO) δ 7.62 – 7.57 (m, 2H), 7.51 – 7.38 (m, 6H), 7.35 (d, *J* = 3.4 Hz, 1H), 3.94 (s, 3H). <sup>13</sup>C NMR (101 MHz, DMSO) δ 165.7, 155.4, 146.2, 143.1 (t, <sup>3</sup>*J*<sub>C-F</sub> = 6.0 Hz),

136.2, 130.5, 129.5, 129.4, 125.9, 124.9, 124.8 (t,  $^1J_{\text{C-F}} = 279.8$  Hz), 120.9, 117.7, 116.0, 56.1.  $^{19}\text{F}$  NMR (376 MHz, DMSO)  $\delta$  -73.1 (s, 2F).

HRMS-ESI (m/z): calcd for  $\text{C}_{17}\text{H}_{13}\text{F}_2\text{O}_2\text{S}^+ [\text{M}+\text{H}]^+$  335.0548, found 335.0551.

### 3-(difluoro((4-fluorophenyl)thio)methyl)-2H-chromen-2-one (3ab)

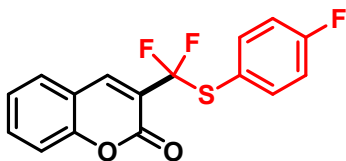

Yellow solid; m.p. = 98.9-100.5 °C; 33% yield;  $^1\text{H}$  NMR (600 MHz,  $\text{CDCl}_3$ )  $\delta$  7.83 (s, 1H), 7.68 – 7.59 (m, 3H), 7.52 (dd,  $J = 7.8, 1.6$  Hz, 1H), 7.37 (d,  $J = 8.4$  Hz, 1H), 7.33 (t,  $J = 7.6$  Hz, 1H), 7.06 (t,  $J = 8.6$  Hz, 2H).  $^{13}\text{C}$  NMR (151 MHz,  $\text{CDCl}_3$ )  $\delta$  165.9, 165.0, 163.3, 156.4, 154.4, 139.0, 129.3 (t,  $^1J_{\text{C-F}} = 280.8$  Hz), 124.9, 122.3 (t,  $^2J_{\text{C-F}} = 27.2$  Hz), 121.8, 117.3, 116.9, 116.4, 116.2.  $^{19}\text{F}$  NMR (565 MHz,  $\text{CDCl}_3$ )  $\delta$  -75.0 (s, 2F), -109.7 (s, 1F).

HRMS-ESI (m/z): calcd for  $\text{C}_{16}\text{H}_{12}\text{F}_3\text{O}_2\text{S}^+ [\text{M}+\text{H}]^+$  323.0348, found 323.0345.

### 3-(((4-chlorophenyl)thio)difluoromethyl)-2H-chromen-2-one (3ac)

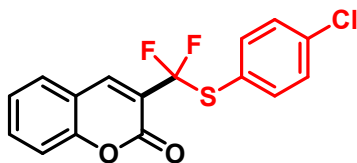

Yellow solid; m.p. = 102.8.3-104.6 °C; 30% yield;  $^1\text{H}$  NMR (600 MHz,  $\text{CDCl}_3$ )  $\delta$  7.86 (s, 1H), 7.63 (t,  $J = 7.8$  Hz, 1H), 7.58 (d,  $J = 8.2$  Hz, 2H), 7.53 (d,  $J = 7.8$  Hz, 1H), 7.40 – 7.31 (m, 4H).  $^{13}\text{C}$  NMR (151 MHz,  $\text{CDCl}_3$ )  $\delta$  165.9, 156.4, 154.4, 138.0, 136.9, 133.7, 129.5, 129.3, 125.1, 124.9 (t,  $^1J_{\text{C-F}} = 281.8$  Hz), 122.3 (t,  $^2J_{\text{C-F}} = 27.2$  Hz), 117.3, 116.9, 116.6.  $^{19}\text{F}$  NMR (565 MHz,  $\text{CDCl}_3$ )  $\delta$  -74.4 (s, 2F).

HRMS-ESI (m/z): calcd for  $\text{C}_{16}\text{H}_{10}\text{ClF}_2\text{O}_2\text{S}^+ [\text{M}+\text{H}]^+$  339.0353, found 339.0357.

### 3-(((4-bromophenyl)thio)difluoromethyl)-2H-chromen-2-one (3ad)

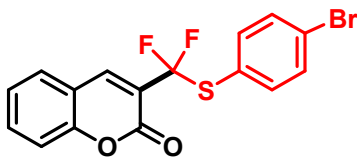

White solid; m.p. = 100.9-104.6 °C; 40% yield;  $^1\text{H}$  NMR (600 MHz,  $\text{CDCl}_3$ )  $\delta$  7.87 (s, 1H), 7.63 (t,  $J = 7.8$  Hz, 1H), 7.56 – 7.46 (m, 5H), 7.37 (d,  $J =$

8.4 Hz, 1H), 7.33 (t,  $J = 7.6$  Hz, 1H).  $^{13}\text{C}$  NMR (151 MHz,  $\text{CDCl}_3$ )  $\delta$  165.9, 156.4, 154.3, 138.3, 138.0, 133.7, 132.5, 132.2, 129.3, 125.2 (t,  $^1J_{\text{C-F}} = 280.8$  Hz), 122.2 (t,  $^2J_{\text{C-F}} = 27.2$  Hz), 117.3, 116.9, 116.6.  $^{19}\text{F}$  NMR (565 MHz,  $\text{CDCl}_3$ )  $\delta$  -74.3 (s, 2F).  
 HRMS-ESI ( $m/z$ ): calcd for  $\text{C}_{16}\text{H}_{10}\text{BrF}_2\text{O}_2\text{S}^+ [\text{M}+\text{H}]^+$  382.9547, found 382.9551.

### 3-(difluoro(*p*-tolylthio)methyl)-2H-chromen-2-one (3ae)

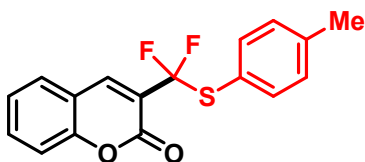

White solid; m.p.= 127.0-129.7 °C; 47% yield;  $^1\text{H}$  NMR (600 MHz,  $\text{CDCl}_3$ )  $\delta$  7.79 (s, 1H), 7.61 (t,  $J = 7.8$  Hz, 1H), 7.51 (d,  $J = 7.8$  Hz, 2H), 7.49 (d,  $J = 7.8$  Hz, 1H), 7.36 (d,  $J = 8.4$  Hz, 1H), 7.31 (t,  $J = 7.6$  Hz, 1H), 7.15 (d,  $J = 7.8$  Hz, 2H), 2.34 (s, 3H).  $^{13}\text{C}$  NMR (151 MHz,  $\text{CDCl}_3$ )  $\delta$  165.9, 156.4, 154.3, 136.9, 136.6, 129.9, 125.0, 124.7, 124.5 (t,  $^1J_{\text{C-F}} = 281.8$  Hz), 123.0, 122.5 (t,  $^2J_{\text{C-F}} = 27.2$  Hz), 117.4, 116.9, 116.6, 21.7.  $^{19}\text{F}$  NMR (565 MHz,  $\text{CDCl}_3$ )  $\delta$  -75.0 (s, 2F).  
 HRMS-ESI ( $m/z$ ): calcd for  $\text{C}_{17}\text{H}_{13}\text{F}_2\text{O}_2\text{S}^+ [\text{M}+\text{H}]^+$  319.0599, found 319.0592.

### 3-(difluoro((4-methoxyphenyl)thio)methyl)-2H-chromen-2-one (3af)

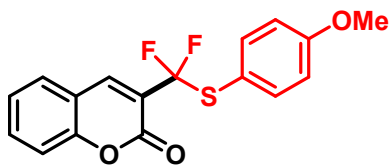

Yellow solid; m.p.= 102.0-104.5 °C; 51% yield;  $^1\text{H}$  NMR (600 MHz,  $\text{CDCl}_3$ )  $\delta$  7.78 (s, 1H), 7.60 (t,  $J = 7.8$  Hz, 1H), 7.54 (d,  $J = 8.2$  Hz, 2H), 7.49 (d,  $J = 7.8$  Hz, 1H), 7.35 (d,  $J = 8.4$  Hz, 1H), 7.31 (t,  $J = 7.6$  Hz, 1H), 6.86 (d,  $J = 8.8$  Hz, 2H), 3.79 (s, 3H).  $^{13}\text{C}$  NMR (151 MHz,  $\text{CDCl}_3$ )  $\delta$  165.9, 161.4, 156.4, 154.3, 138.7, 138.4, 133.5, 125.0, 124.7 (t,  $^1J_{\text{C-F}} = 281.8$  Hz), 122.5 (t,  $^2J_{\text{C-F}} = 27.2$  Hz), 117.4, 117.0, 116.5, 114.7, 54.8.  $^{19}\text{F}$  NMR (565 MHz,  $\text{CDCl}_3$ )  $\delta$  -75.6 (s, 2F).  
 HRMS-ESI ( $m/z$ ): calcd for  $\text{C}_{17}\text{H}_{13}\text{F}_2\text{O}_3\text{S}^+ [\text{M}+\text{H}]^+$  335.0548, found 335.0552.

### 3-(((3,5-dimethylphenyl)thio)difluoromethyl)-2H-chromen-2-one (3ag)

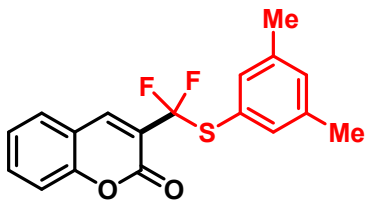

Yellow solid; m.p.= 103.6-105.3 °C; 55% yield;  $^1\text{H}$  NMR (600 MHz,  $\text{CDCl}_3$ )  $\delta$  7.79 (s, 1H), 7.60 (t,  $J$  = 8.6 Hz, 1H), 7.48 (dd,  $J$  = 7.8, 1.6 Hz, 1H), 7.35 (t,  $J$  = 7.5 Hz, 2H), 7.30 (t,  $J$  = 7.0 Hz, 1H), 7.25 (s, 2H), 2.26 (s, 6H).  $^{13}\text{C}$  NMR (151 MHz,  $\text{CDCl}_3$ )  $\delta$  165.2, 154.3, 151.9, 141.5 (t,  $^3J_{\text{C-F}}$  = 6.0 Hz), 138.7, 134.3, 133.4, 131.9, 129.1, 124.9 (t,  $^1J_{\text{C-F}}$  = 280.8 Hz), 122.5 (t,  $^2J_{\text{C-F}}$  = 27.2 Hz), 117.3, 117.3, 116.6, 21.0.  $^{19}\text{F}$  NMR (565 MHz,  $\text{CDCl}_3$ )  $\delta$  -74.7 (s, 2F).  
HRMS-ESI ( $m/z$ ): calcd for  $\text{C}_{18}\text{H}_{15}\text{F}_2\text{O}_2\text{S}^+ [\text{M}+\text{H}]^+$  333.0755, found 333.0759.

### 3-(difluoro(phenoxy)methyl)-2H-chromen-2-one (5aa)

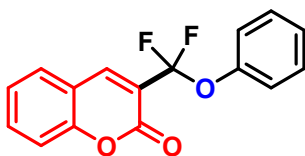

Yellow solid; m.p.= 100.7-101.9 °C; 76% yield;  $^1\text{H}$  NMR (400 MHz,  $\text{CDCl}_3$ )  $\delta$  8.22 (s, 1H), 7.67 – 7.54 (m, 2H), 7.40 – 7.29 (m, 6H), 7.23 (d,  $J$  = 7.8 Hz, 1H).  $^{13}\text{C}$  NMR (101 MHz,  $\text{CDCl}_3$ )  $\delta$  156.3, 154.5, 149.9, 142.6 (t,  $^3J_{\text{C-F}}$  = 5.0 Hz), 133.6, 129.4, 129.2, 126.0, 124.9, 122.1, 120.5 (t,  $^2J_{\text{C-F}}$  = 33.4 Hz), 119.4 (t,  $^1J_{\text{C-F}}$  = 263.6 Hz), 117.3, 116.8.  $^{19}\text{F}$  NMR (376 MHz,  $\text{CDCl}_3$ )  $\delta$  -69.1 (s, 2F).  
HRMS-ESI ( $m/z$ ): calcd for  $\text{C}_{16}\text{H}_{10}\text{F}_2\text{NaO}_3^+ [\text{M}+\text{Na}]^+$  311.0490, found 311.0492.

### 3-(difluoro(phenoxy)methyl)-6-methyl-2H-chromen-2-one (5ba)

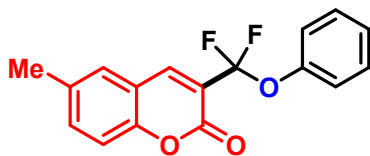

White solid; m.p.= 100.2-102.2 °C; 50% yield;  $^1\text{H}$  NMR (600 MHz,  $\text{CDCl}_3$ )  $\delta$  8.15 (s, 1H), 7.41 (d,  $J$  = 8.4 Hz, 1H), 7.38 – 7.34 (m, 3H), 7.31 (d,  $J$  = 8.0 Hz, 2H), 7.27 – 7.20 (m, 2H), 2.41 (s, 3H).  $^{13}\text{C}$  NMR (151 MHz,  $\text{CDCl}_3$ )  $\delta$  156.6, 152.6, 149.9, 142.6, 134.7 (t,  $^3J_{\text{C-F}}$  = 4.6 Hz), 129.3, 125.9, 122.2, 122.0, 120.3 (t,  $^2J_{\text{C-F}}$  = 33.2 Hz), 119.5 (t,  $^1J_{\text{C-F}}$  = 262.6 Hz), 117.0, 116.5, 116.4, 20.9.  $^{19}\text{F}$  NMR (565 MHz,  $\text{CDCl}_3$ )  $\delta$  -69.0 (s, 2F).

HRMS-ESI (m/z): calcd for  $C_{17}H_{13}F_2O_3^+ [M+H]^+$  303.0827, found 303.0831.

**3-(difluoro(phenoxy)methyl)-6-fluoro-2H-chromen-2-one (5ca)**

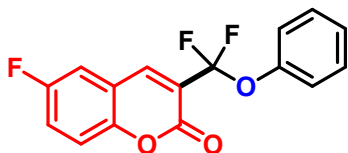

White solid; m.p.= 161.9-164.3 °C; 64% yield;  $^1H$  NMR (600 MHz,  $CDCl_3$ )  $\delta$  8.17 (s, 1H), 7.39 – 7.34 (m, 4H), 7.33 – 7.27 (m, 3H), 7.25 (d,  $J$  = 6.6 Hz, 1H).  $^{13}C$  NMR (151 MHz,  $CDCl_3$ )  $\delta$  159.6, 158.0, 155.9, 150.7, 149.8, 141.6 (q,  $^3J$  = 4.8 Hz), 129.5, 126.1, 122.1, 121.7 (t,  $^2J_{C-F}$  = 33.2 Hz), 121.2 (d,  $^2J$  = 24.6 Hz), 118.5 (d,  $^3J$  = 8.4 Hz), 117.9 (t,  $^1J_{C-F}$  = 263.6 Hz), 114.3 (d,  $^2J$  = 24.0 Hz).  $^{19}F$  NMR (565 MHz,  $CDCl_3$ )  $\delta$  -69.3 (s, 2F), -116.3 (s, 1F).

HRMS-ESI (m/z): calcd for  $C_{16}H_{10}F_3O_3^+ [M+H]^+$  307.0577, found 307.0581.

**6-chloro-3-(difluoro(phenoxy)methyl)-2H-chromen-2-one (5da)**

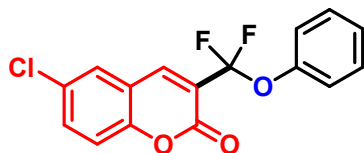

White solid; m.p.= 175.8-177.4 °C; 78% yield;  $^1H$  NMR (600 MHz,  $CDCl_3$ )  $\delta$  8.15 (s, 1H), 7.58 (d,  $J$  = 10.2 Hz, 2H), 7.38 (t,  $J$  = 7.8 Hz, 2H), 7.32 (dd,  $J$  = 12.6, 8.4 Hz, 3H), 7.25 (d,  $J$  = 5.0 Hz, 1H).  $^{13}C$  NMR (151 MHz,  $CDCl_3$ )  $\delta$  155.7, 152.9, 149.8, 141.4 (t,  $^3J_{C-F}$  = 4.6 Hz), 133.5, 130.2, 129.5, 128.3, 126.1, 122.1, 121.7 (t,  $^2J_{C-F}$  = 33.2 Hz), 120.9, 119.1 (t,  $^1J_{C-F}$  = 262.6 Hz), 118.3.  $^{19}F$  NMR (565 MHz,  $CDCl_3$ )  $\delta$  -69.3 (s, 2F).

HRMS-ESI (m/z): calcd for  $C_{16}H_{10}ClF_2O_3^+ [M+H]^+$  323.0281, found 323.0288.

**6-bromo-3-(difluoro(phenoxy)methyl)-2H-chromen-2-one (5ea)**

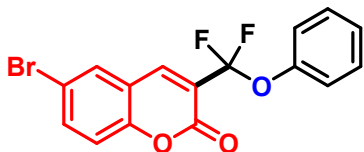

Yellow solid; m.p.= 160.4-161.6 °C; 83% yield;  $^1H$  NMR (600 MHz,  $CDCl_3$ )  $\delta$  8.14 (s, 1H), 7.76 – 7.64 (m, 2H), 7.37 (t,  $J$  = 7.8 Hz, 2H), 7.30 (d,  $J$  = 8.0 Hz, 2H), 7.26 (t,  $J$  = 7.2 Hz, 2H).  $^{13}C$  NMR (151 MHz,  $CDCl_3$ )  $\delta$  155.6, 153.3,

149.8, 141.3 (t,  $^3J_{\text{C-F}} = 6.0$  Hz), 136.3, 131.4, 129.5, 126.1, 122.1, 121.7 (t,  $^2J_{\text{C-F}} = 33.2$  Hz), 119.1 (t,  $^1J_{\text{C-F}} = 263.6$  Hz), 118.8, 118.5, 117.4.  $^{19}\text{F}$  NMR (565 MHz,  $\text{CDCl}_3$ )  $\delta$  -69.2 (s, 2F).

HRMS-ESI (m/z): calcd for  $\text{C}_{16}\text{H}_{10}\text{BrF}_2\text{O}_3^+ [\text{M}+\text{H}]^+$  366.9776, found 366.9783.

### 3-(difluoro(phenoxy)methyl)-6-nitro-2H-chromen-2-one (5fa)

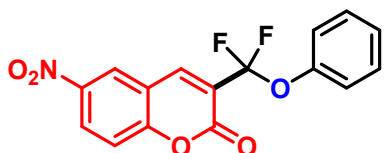

Yellow solid; m.p. = 185.9-186.5 °C; 40% yield;  $^1\text{H}$  NMR (600 MHz, DMSO)  $\delta$  8.92 (s, 2H), 8.52 (dd,  $J = 9.0, 2.8$  Hz, 1H), 7.70 (d,  $J = 9.0$  Hz, 1H), 7.47 (t,  $J = 7.8$  Hz, 2H), 7.38 – 7.28 (m, 3H).  $^{13}\text{C}$  NMR (151 MHz, DMSO)  $\delta$  157.6, 155.0, 149.2, 143.8, 143.4 (t,  $^3J_{\text{C-F}} = 4.6$  Hz), 129.9, 128.3, 128.0, 126.4, 126.0, 121.7, 120.4 (t,  $^2J_{\text{C-F}} = 33.2$  Hz), 117.9 (t,  $^1J_{\text{C-F}} = 263.6$  Hz), 117.7.  $^{19}\text{F}$  NMR (565 MHz, DMSO)  $\delta$  -67.9 (s, 2F).

HRMS-ESI (m/z): calcd for  $\text{C}_{16}\text{H}_{10}\text{F}_2\text{NO}_5^+ [\text{M}+\text{H}]^+$  334.0522, found 334.0528.

### 8-chloro-3-(difluoro(phenoxy)methyl)-2H-chromen-2-one (5ga)

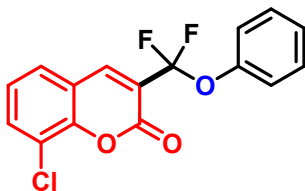

Yellow solid; m.p. = 114.7-116.6 °C; 63% yield;  $^1\text{H}$  NMR (600 MHz,  $\text{CDCl}_3$ )  $\delta$  8.20 (s, 1H), 7.67 (d,  $J = 8.0$  Hz, 1H), 7.51 (d,  $J = 7.8$  Hz, 1H), 7.36 (t,  $J = 7.8$  Hz, 2H), 7.32 – 7.28 (m, 3H), 7.24 (t,  $J = 7.4$  Hz, 1H).  $^{13}\text{C}$  NMR (151 MHz,  $\text{CDCl}_3$ )  $\delta$  155.9, 153.1, 150.0, 141.6 (t,  $^3J_{\text{C-F}} = 4.6$  Hz), 133.7, 130.4, 129.7, 128.5, 126.3, 124.6, 122.3, 122.2 (t,  $^2J_{\text{C-F}} = 33.2$  Hz), 119.3 (t,  $^1J_{\text{C-F}} = 262.6$  Hz), 118.5.  $^{19}\text{F}$  NMR (565 MHz,  $\text{CDCl}_3$ )  $\delta$  -69.1 (s, 2F).

HRMS-ESI (m/z): calcd for  $\text{C}_{16}\text{H}_{10}\text{ClF}_2\text{O}_3^+ [\text{M}+\text{H}]^+$  323.0281, found 323.0285.

### 6,8-dichloro-3-(difluoro(phenoxy)methyl)-2H-chromen-2-one (5ha)

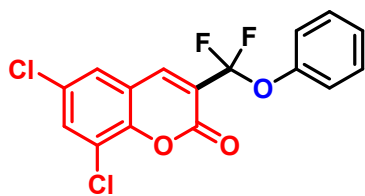

White solid; m.p.= 159.1-162.9 °C; 56% yield;  $^1\text{H}$  NMR (600 MHz,  $\text{CDCl}_3$ )  $\delta$  8.13 (s, 1H), 7.67 (d,  $J$  = 2.4 Hz, 1H), 7.50 (d,  $J$  = 2.4 Hz, 1H), 7.37 (dd,  $J$  = 8.6, 7.2 Hz, 2H), 7.29 (d,  $J$  = 7.8 Hz, 2H), 7.25 (t,  $J$  = 7.4 Hz, 1H).  $^{13}\text{C}$  NMR (151 MHz,  $\text{CDCl}_3$ )  $\delta$  154.5, 149.7, 148.9, 141.1 (t,  $^3J_{\text{C-F}}$  = 4.6 Hz), 133.4, 130.0, 129.5, 126.9, 126.2, 122.9, 122.5 (t,  $^2J_{\text{C-F}}$  = 33.2 Hz), 122.1, 119.1 (t,  $^1J_{\text{C-F}}$  = 262.6 Hz), 118.9.  $^{19}\text{F}$  NMR (565 MHz,  $\text{CDCl}_3$ )  $\delta$  -69.2 (s, 2F). HRMS-ESI (m/z): calcd for  $\text{C}_{16}\text{H}_9\text{Cl}_2\text{F}_2\text{O}_3^+$   $[\text{M}+\text{H}]^+$  356.9891, found 356.9895.

### 3-(difluoro(phenoxy)methyl)-8-methoxy-2H-chromen-2-one (5ia)

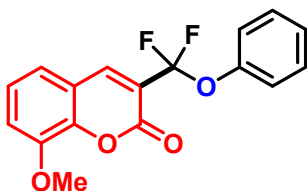

White solid; m.p.= 122.0-125.0 °C; 38% yield;  $^1\text{H}$  NMR (400 MHz,  $\text{CDCl}_3$ )  $\delta$  7.75 (s, 1H), 7.64 (d,  $J$  = 7.2 Hz, 2H), 7.35 (t,  $J$  = 7.4 Hz, 3H), 7.31 – 7.27 (m, 2H), 7.18 (dd,  $J$  = 9.0, 3.0 Hz, 1H), 3.84 (s, 3H).  $^{13}\text{C}$  NMR (101 MHz,  $\text{CDCl}_3$ )  $\delta$  156.7, 156.3, 148.8, 141.4 (t,  $^3J_{\text{C-F}}$  = 6.0 Hz), 136.8, 135.8, 130.2, 129.3, 129.1, 121.5 (t,  $^1J_{\text{C-F}}$  = 280.8 Hz), 120.4 (t,  $^2J_{\text{C-F}}$  = 27.2 Hz), 118.4, 117.8, 110.7, 55.9.  $^{19}\text{F}$  NMR (376 MHz,  $\text{CDCl}_3$ )  $\delta$  -69.1 (s, 2F). HRMS-ESI (m/z): calcd for  $\text{C}_{17}\text{H}_{13}\text{F}_2\text{O}_4^+$   $[\text{M}+\text{H}]^+$  319.0776, found 319.0779.

### 3-(difluoro(4-fluorophenoxy)methyl)-2H-chromen-2-one (5ab)

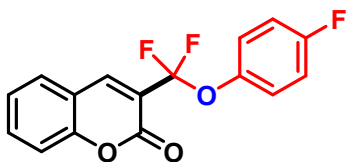

White solid; m.p.= 145.5-148.0 °C; 70% yield;  $^1\text{H}$  NMR (600 MHz,  $\text{CDCl}_3$ )  $\delta$  8.21 (s, 1H), 7.64 (t,  $J$  = 7.2 Hz, 1H), 7.60 (dd,  $J$  = 7.8, 1.6 Hz, 1H), 7.39 – 7.33 (m, 2H), 7.29 (dd,  $J$  = 9.0, 4.6 Hz, 2H), 7.10 – 6.96 (m, 2H).  $^{13}\text{C}$  NMR (151 MHz,  $\text{CDCl}_3$ )  $\delta$  161.3, 159.7, 156.3, 154.5, 142.7 (t,  $^3J_{\text{C-F}}$  = 4.6 Hz), 133.7, 129.2, 124.9, 123.9

(d,  $^3J = 8.4$  Hz), 120.3 (t,  $^2J_{C-F} = 33.2$  Hz), 117.2 (t,  $^1J_{C-F} = 263.6$  Hz), 116.8, 116.1, 116.0.  $^{19}\text{F}$  NMR (565 MHz,  $\text{CDCl}_3$ )  $\delta$  -69.6 (s, 2F), -116.4 (s, 1F).

HRMS-ESI (m/z): calcd for  $\text{C}_{16}\text{H}_{10}\text{F}_3\text{O}_3^+ [\text{M}+\text{H}]^+$  307.0577, found 307.0572.

### 3-((4-chlorophenoxy)difluoromethyl)-2H-chromen-2-one (5ac)

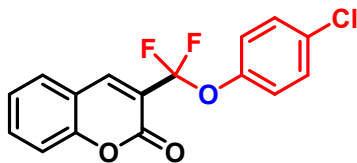

White solid; m.p. = 153.1-155.2 °C; 67% yield;  $^1\text{H}$  NMR (600 MHz,  $\text{CDCl}_3$ )  $\delta$  8.21 (s, 1H), 7.64 (t,  $J = 7.2$  Hz, 1H), 7.60 (dd,  $J = 7.8, 1.6$  Hz, 1H), 7.40 – 7.35 (m, 2H), 7.33 (d,  $J = 9.0$  Hz, 2H), 7.26 (d,  $J = 9.0$  Hz, 2H).  $^{13}\text{C}$  NMR (151 MHz,  $\text{CDCl}_3$ )  $\delta$  156.3, 154.5, 148.4, 142.7 (t,  $^3J_{C-F} = 4.6$  Hz), 133.8, 131.6, 129.5, 129.2, 125.0, 123.6, 120.2 (t,  $^2J_{C-F} = 33.2$  Hz), 119.4 (t,  $^1J_{C-F} = 262.6$  Hz), 117.2, 116.8.  $^{19}\text{F}$  NMR (565 MHz,  $\text{CDCl}_3$ )  $\delta$  -69.5 (s, 2F).

HRMS-ESI (m/z): calcd for  $\text{C}_{16}\text{H}_{10}\text{ClF}_2\text{O}_2^+ [\text{M}+\text{H}]^+$  323.0281, found 323.0286.

### 3-((4-(tert-butyl)phenoxy)difluoromethyl)-2H-chromen-2-one (5ae)

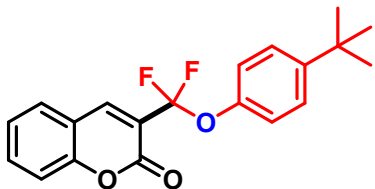

Yellow solid; m.p. = 107.6-109.7 °C; 83% yield;  $^1\text{H}$  NMR (600 MHz,  $\text{CDCl}_3$ )  $\delta$  8.21 (s, 1H), 7.64 – 7.54 (m, 2H), 7.38 – 7.36 (m, 2H), 7.34 (t,  $J = 3.0$  Hz, 2H), 7.23 (d,  $J = 8.6$  Hz, 2H), 1.31 (s, 9H).  $^{13}\text{C}$  NMR (151 MHz,  $\text{CDCl}_3$ )  $\delta$  156.3, 154.4, 148.8, 147.5, 142.6 (t,  $^3J_{C-F} = 4.6$  Hz), 133.5, 129.2, 126.2, 124.8, 121.5, 120.6 (t,  $^2J_{C-F} = 33.2$  Hz), 119.4 (t,  $^1J_{C-F} = 263.6$  Hz), 117.3, 116.7, 34.4, 31.3.  $^{19}\text{F}$  NMR (565 MHz,  $\text{CDCl}_3$ )  $\delta$  -69.1 (s, 2F).

HRMS-ESI (m/z): calcd for  $\text{C}_{20}\text{H}_{19}\text{F}_2\text{O}_3^+ [\text{M}+\text{H}]^+$  345.1297, found 345.1301.

### 3-(difluoro(p-tolyloxy)methyl)-2H-chromen-2-one (5af)

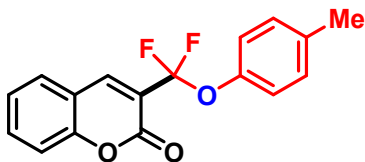

Yellow solid; m.p.= 126.6-128.3 °C; 71% yield; <sup>1</sup>H NMR (600 MHz, CDCl<sub>3</sub>) δ 8.20 (s, 1H), 7.62 (t, *J* = 7.2 Hz, 1H), 7.59 (d, *J* = 7.8 Hz, 1H), 7.36 (d, *J* = 8.0 Hz, 1H), 7.33 (t, *J* = 7.0 Hz, 1H), 7.20 (d, *J* = 8.4 Hz, 2H), 7.15 (d, *J* = 8.4 Hz, 2H), 2.33 (s, 1H). <sup>13</sup>C NMR (151 MHz, CDCl<sub>3</sub>) δ 156.4, 154.5, 147.6, 142.6 (t, <sup>3</sup>*J*<sub>C-F</sub> = 4.6 Hz), 135.7, 133.6, 129.9, 129.2, 124.9, 122.0, 120.6 (t, <sup>2</sup>*J*<sub>C-F</sub> = 33.2 Hz), 119.4 (t, <sup>1</sup>*J*<sub>C-F</sub> = 262.6 Hz), 117.3, 116.8, 20.8. <sup>19</sup>F NMR (565 MHz, CDCl<sub>3</sub>) δ -69.1 (s, 2F). HRMS-ESI (*m/z*): calcd for C<sub>17</sub>H<sub>13</sub>F<sub>2</sub>O<sub>3</sub><sup>+</sup> [M+H]<sup>+</sup> 303.0827, found 303.0822.

### 3-(difluoro(phenylsulfonyl)methyl)-6-fluoro-2H-chromen-2-one (9)

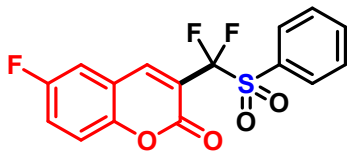

White solid; m.p.= 133.1-135.2 °C; 89% yield; <sup>1</sup>H NMR (400 MHz, DMSO) δ 8.66 (d, *J* = 26.0 Hz, 1H), 7.99 (d, *J* = 7.4 Hz, 1H), 7.87 – 7.74 (m, 2H), 7.72 – 7.64 (m, 2H), 7.63 – 7.53 (m, 3H). <sup>13</sup>C NMR (101 MHz, DMSO) δ 163.7, 156.3, 154.5, 150.9, 147.2, 136.4, 131.7, 131.3 (t, <sup>1</sup>*J*<sub>C-F</sub> = 272.8 Hz), 130.5, 130.1, 128.9, 124.4, 122.50 (d, <sup>2</sup>*J* = 24.8 Hz), 114.98 (d, <sup>2</sup>*J* = 24.2 Hz). <sup>19</sup>F NMR (376 MHz, DMSO) δ -100.6 (s, 2F), -117.7 (s, 1F). HRMS-ESI (*m/z*): calcd for C<sub>16</sub>H<sub>10</sub>F<sub>3</sub>O<sub>4</sub>S<sup>+</sup> [M+H]<sup>+</sup> 354.0174, found 354.0178.

### 3-((4-((2-(1H-indol-3-yl)ethyl)amino)phenoxy)difluoromethyl)-2H-chromen-2-one (10)

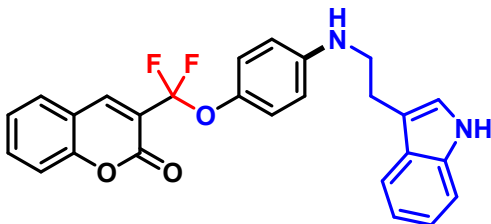

Yellow liquid; 37% yield; <sup>1</sup>H NMR (400 MHz, DMSO) δ 10.40 (t, *J* = 5.6 Hz, 1H), 8.29 (s, 1H), 7.67 (dd, *J* = 7.8, 1.8 Hz, 1H), 7.54 (dd, *J* = 8.0, 5.2 Hz, 2H), 7.52 – 7.43 (m, 1H), 7.38 – 7.28 (m, 2H), 7.20 (td, *J* = 7.6, 1.2 Hz, 1H), 7.17 – 7.11 (m, 1H), 7.09 – 7.02 (m, 3H), 7.02 – 6.92 (m, 3H), 3.71 (t, *J* = 7.2 Hz,

2H), 3.52 (q,  $J = 7.0$  Hz, 2H).  $^{13}\text{C}$  NMR (101 MHz, DMSO)  $\delta$  161.2, 153.2, 148.8, 138.4, 136.3, 136.2, 132.4, 129.5, 127.3, 127.1, 124.0, 122.8, 122.7 (t,  $^1J_{\text{C-F}} = 252.4$  Hz), 120.9, 120.8, 120.8, 118.3 (t,  $^3J_{\text{C-F}} = 4.0$  Hz), 118.1, 114.8, 112.7, 111.6, 111.3, 46.3, 25.9.  $^{19}\text{F}$  NMR (376 MHz, DMSO)  $\delta$  -64.3(s, 2F).

HRMS-ESI ( $m/z$ ): calcd for  $\text{C}_{26}\text{H}_{21}\text{F}_2\text{N}_2\text{O}_3^+ [\text{M}+\text{H}]^+$  446.1442, found 446.1440.

## 5. $^1\text{H}$ NMR, $^{13}\text{C}$ NMR and $^{19}\text{F}$ NMR of compound

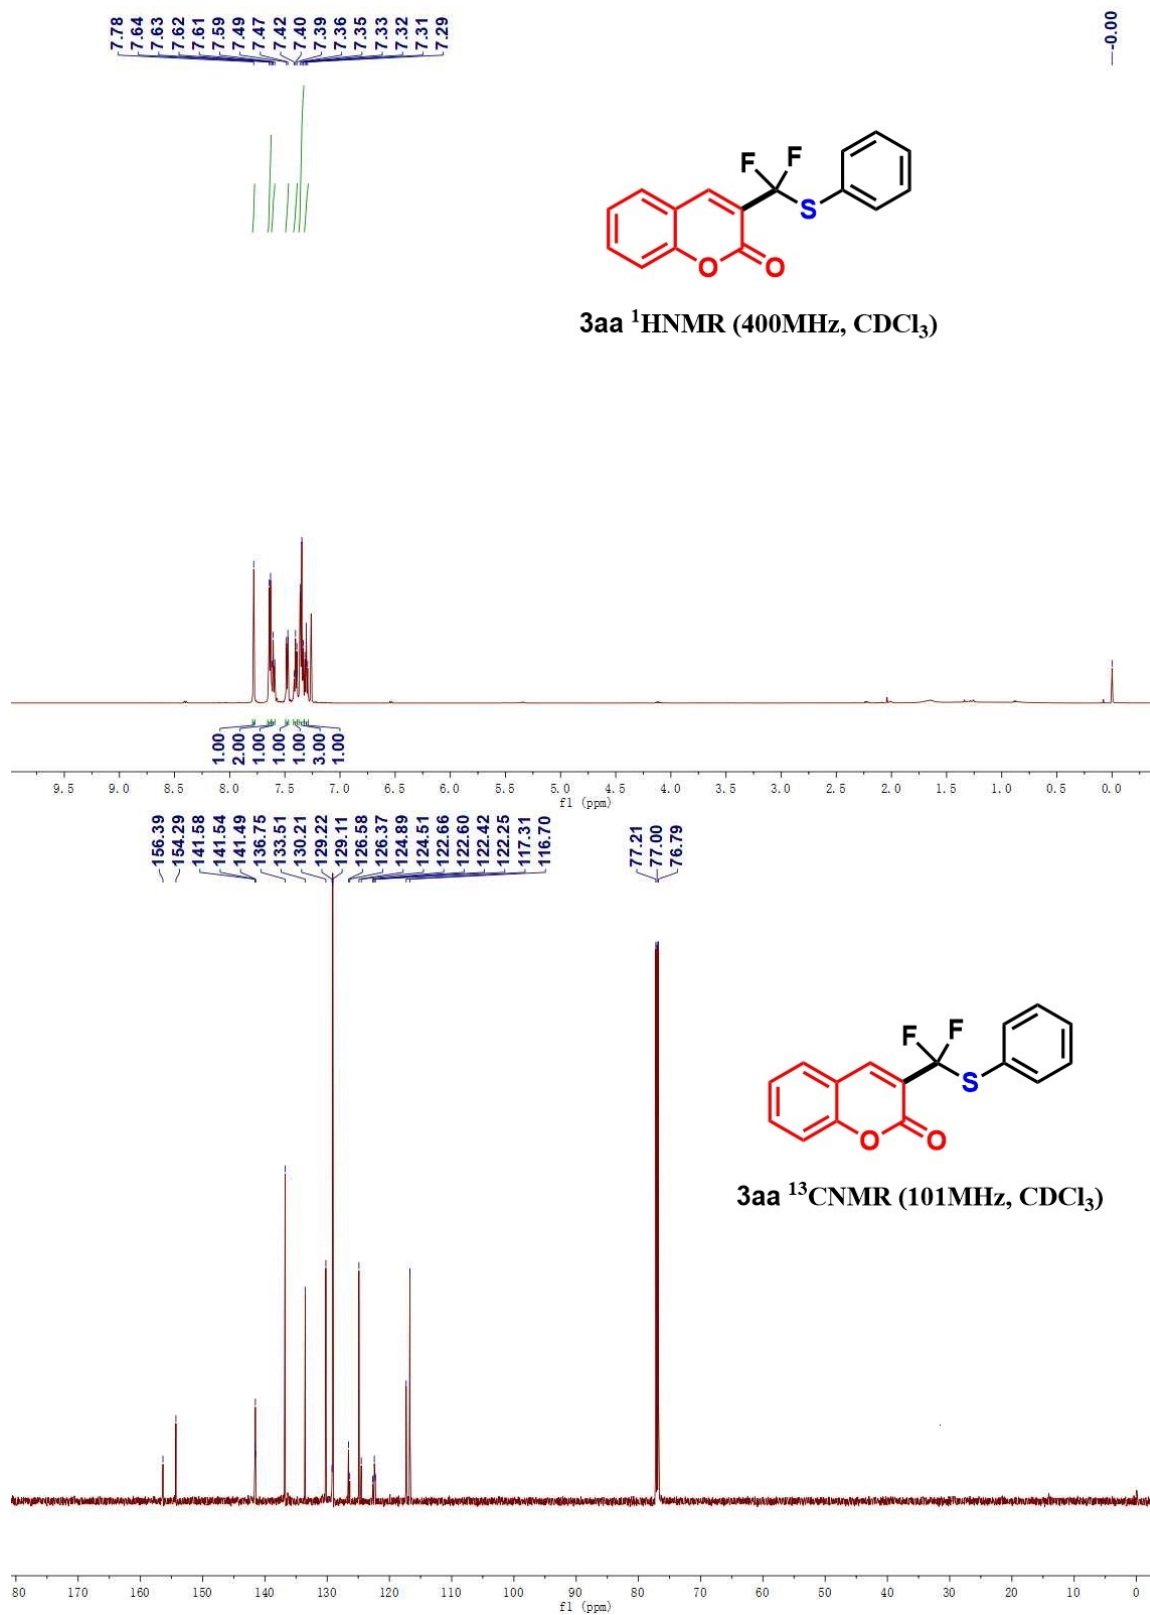

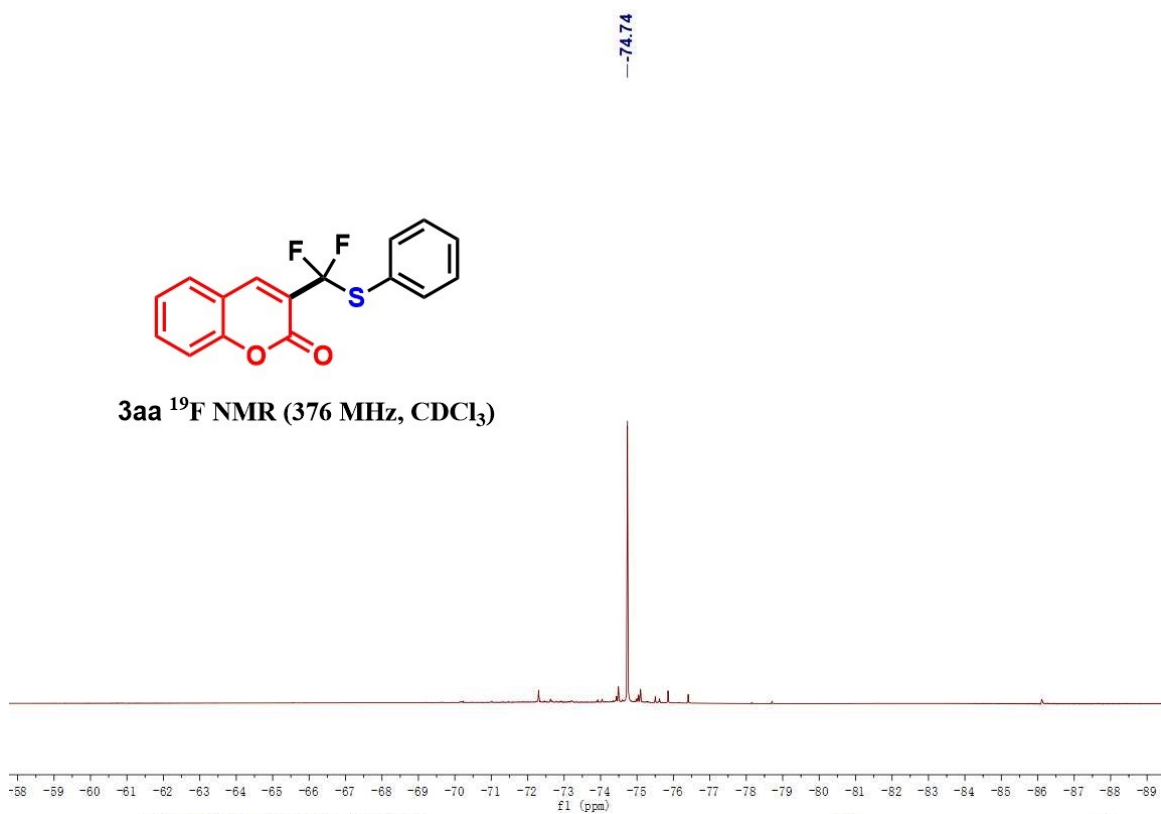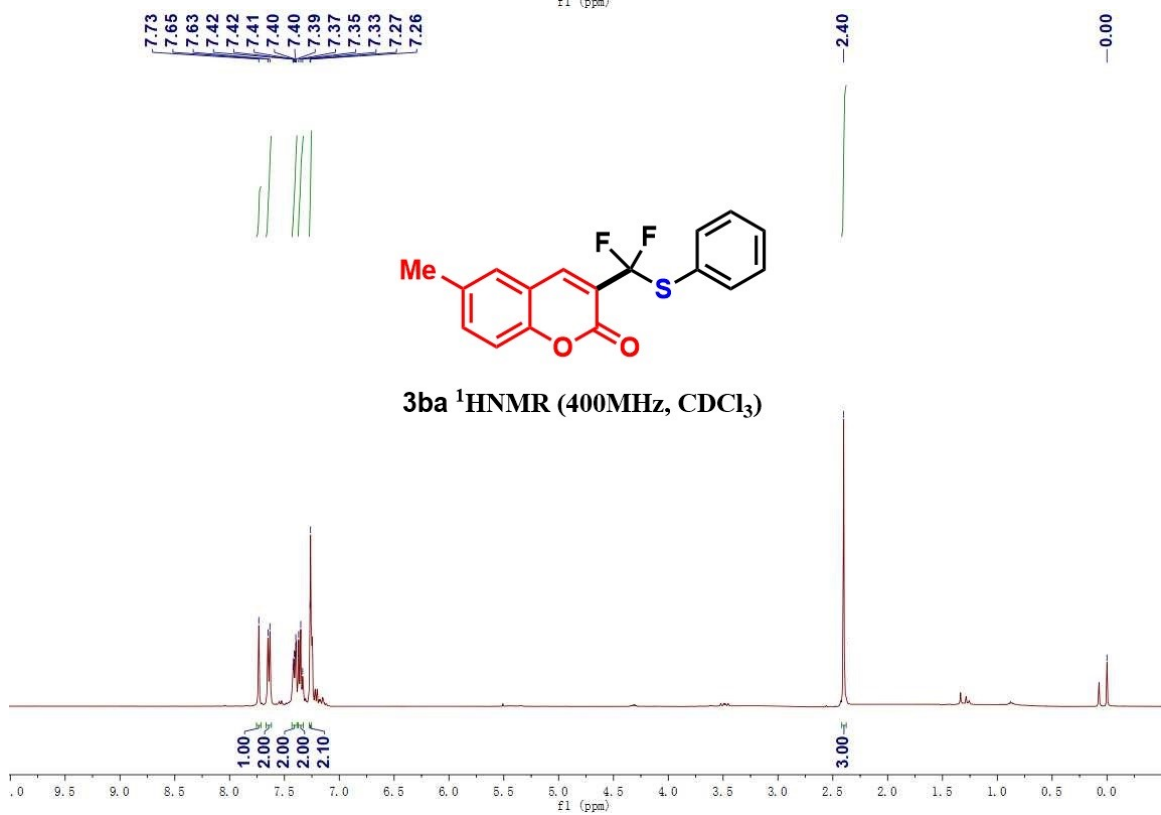

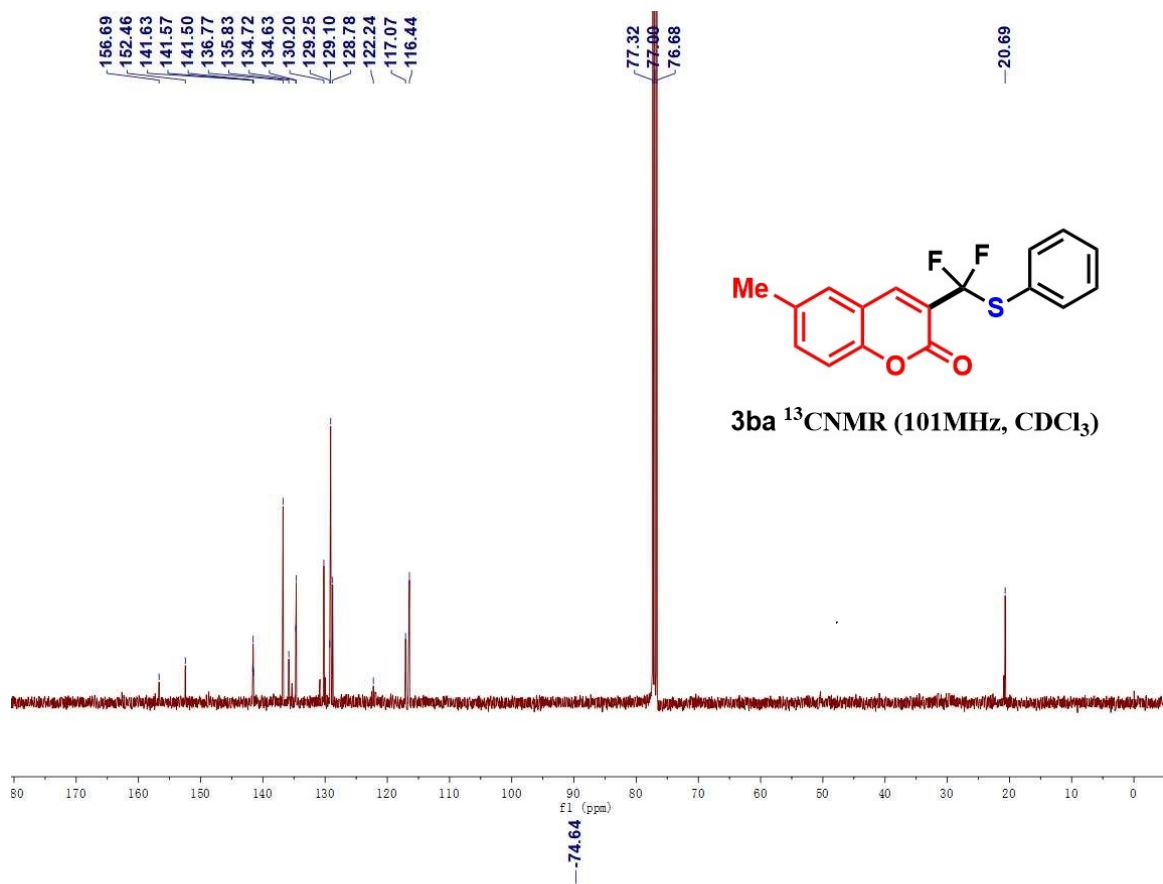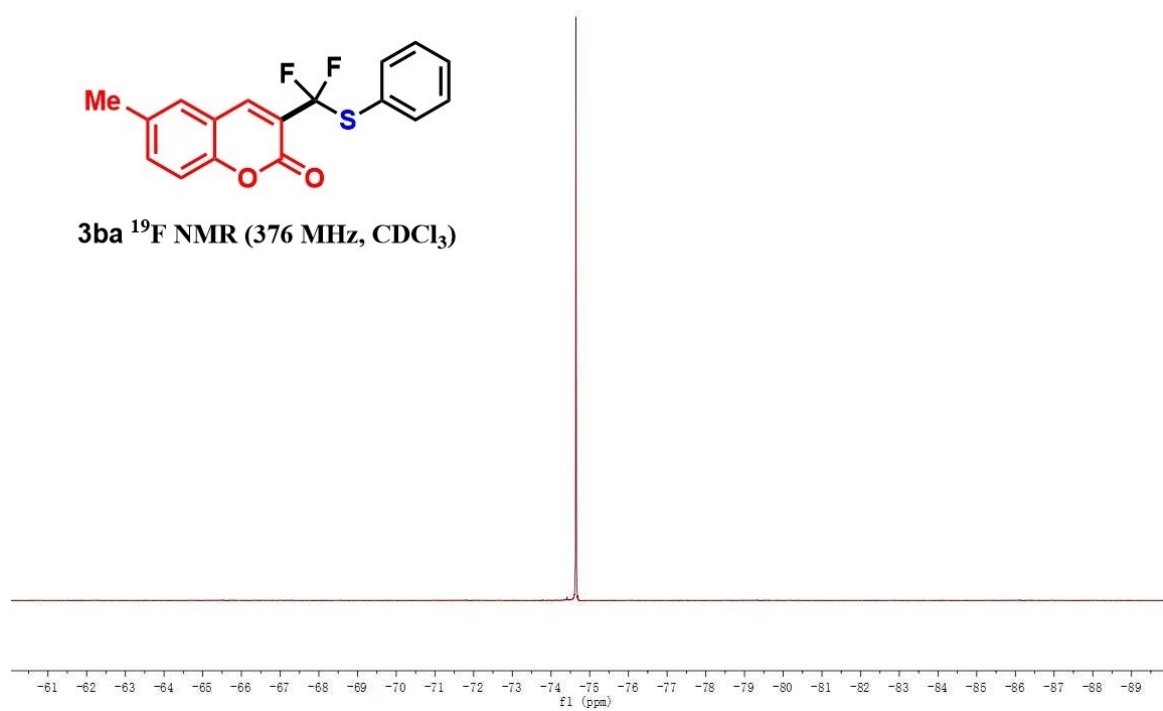

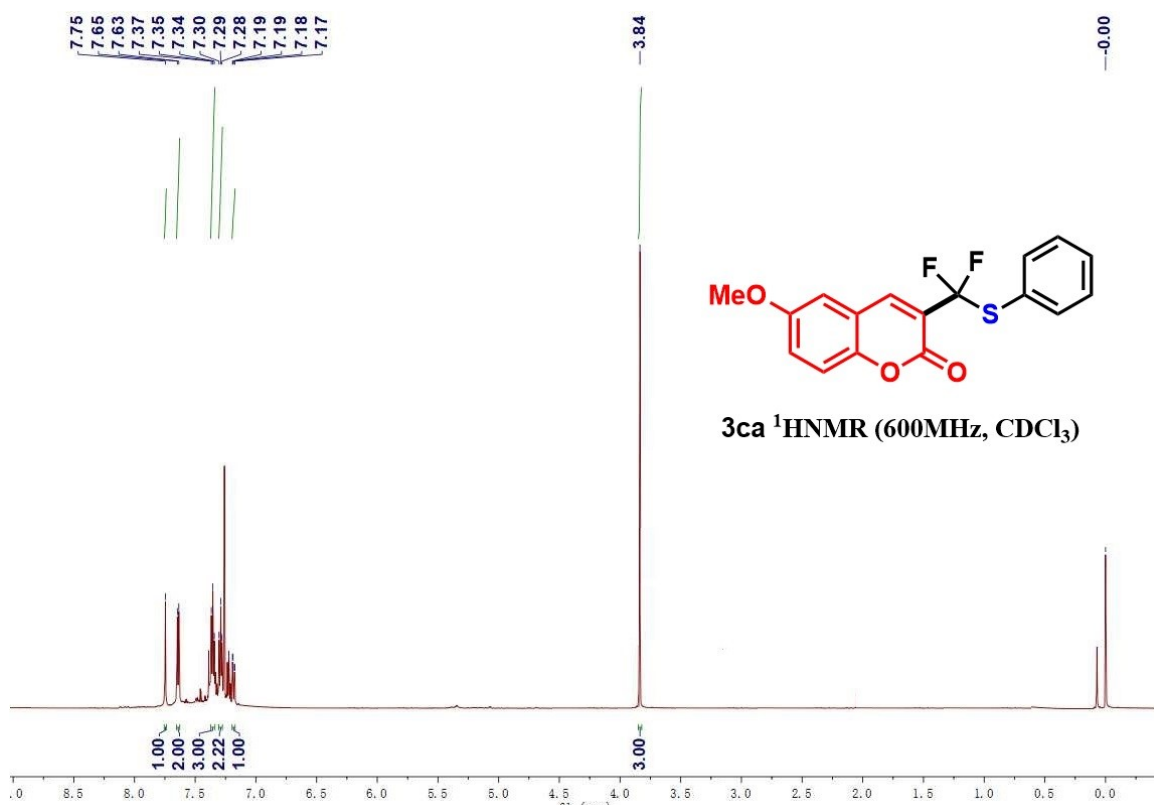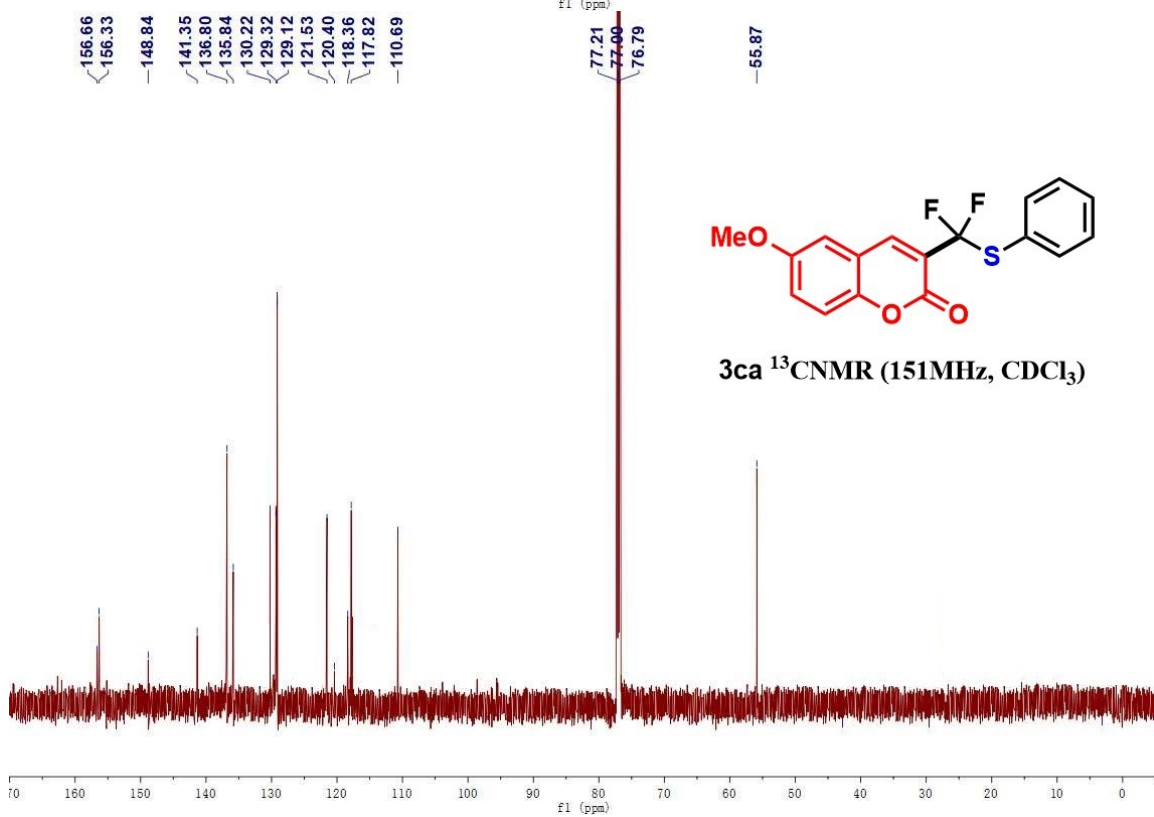

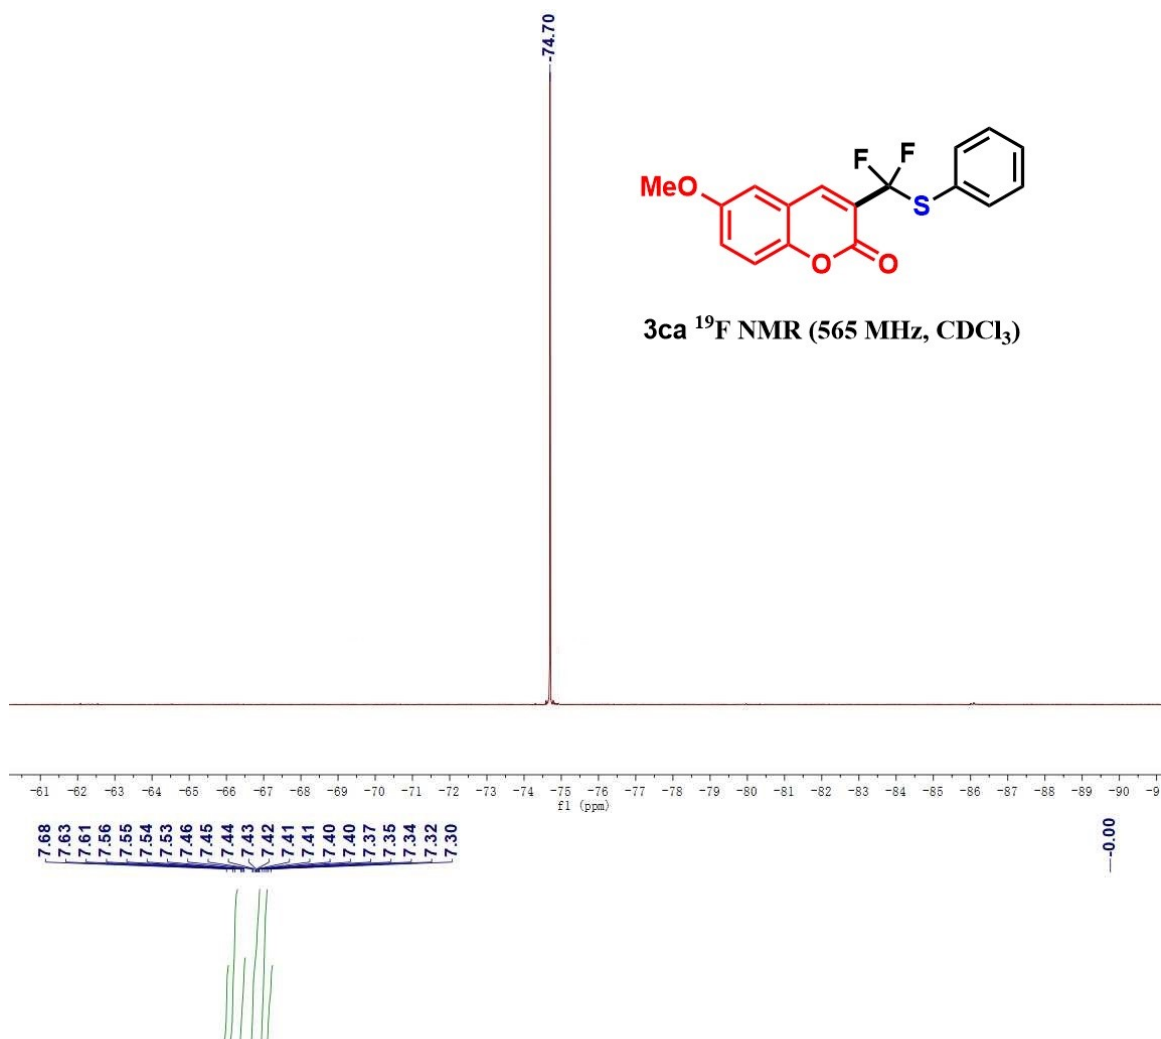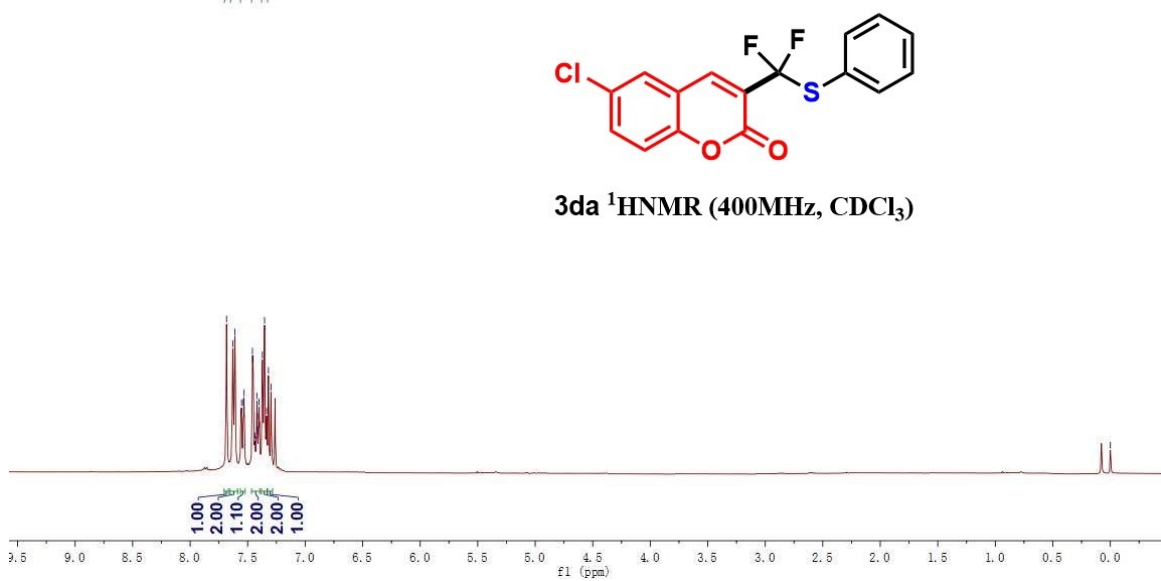

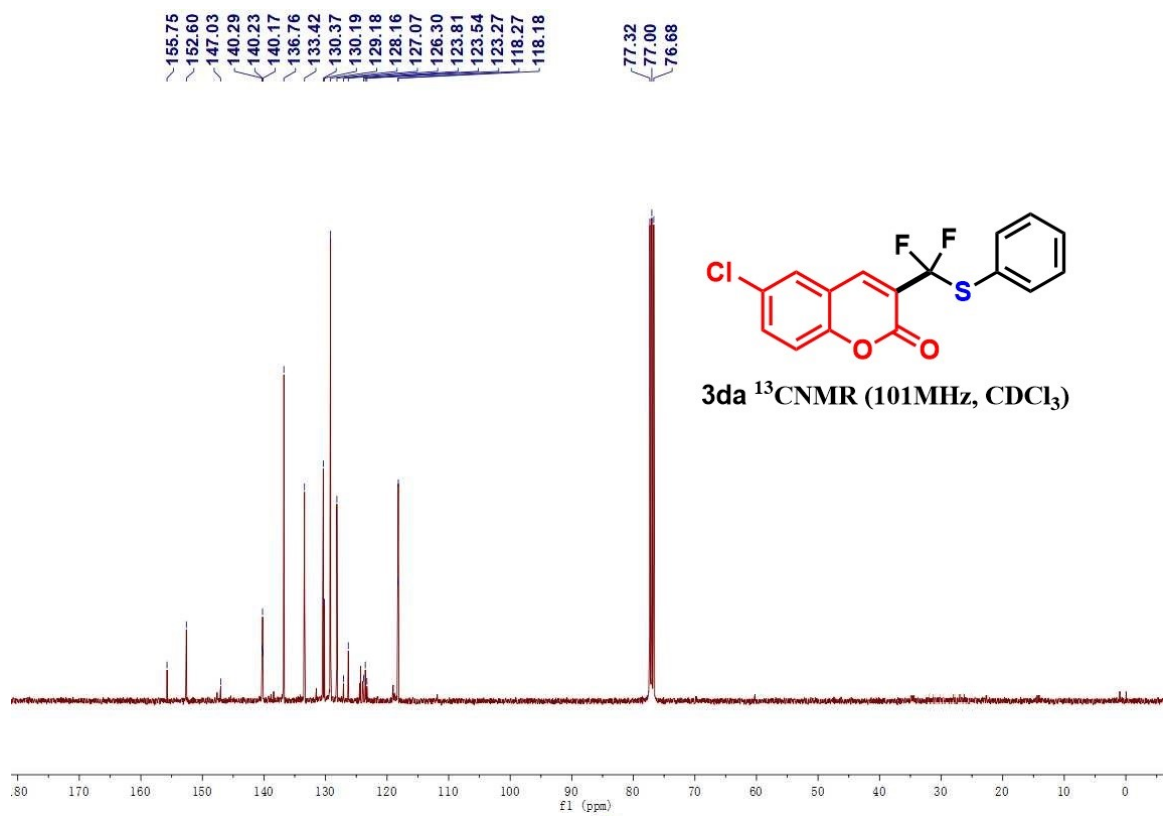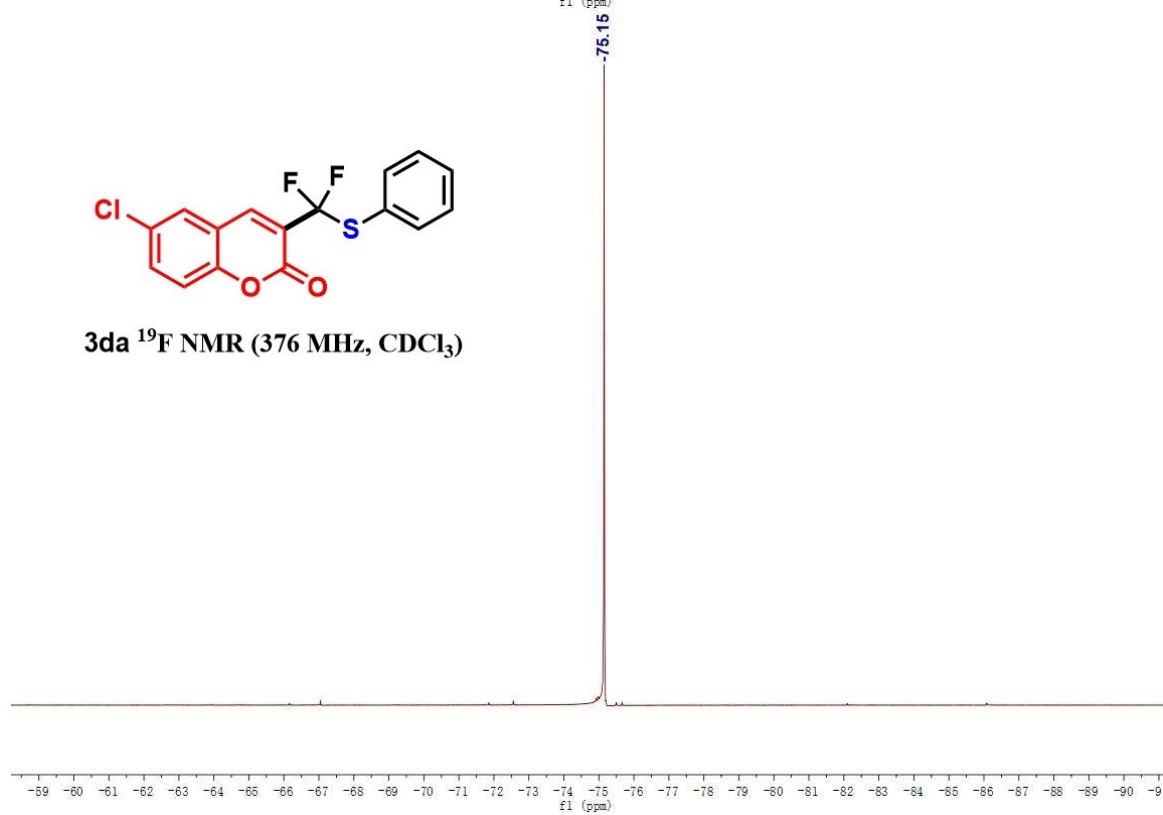

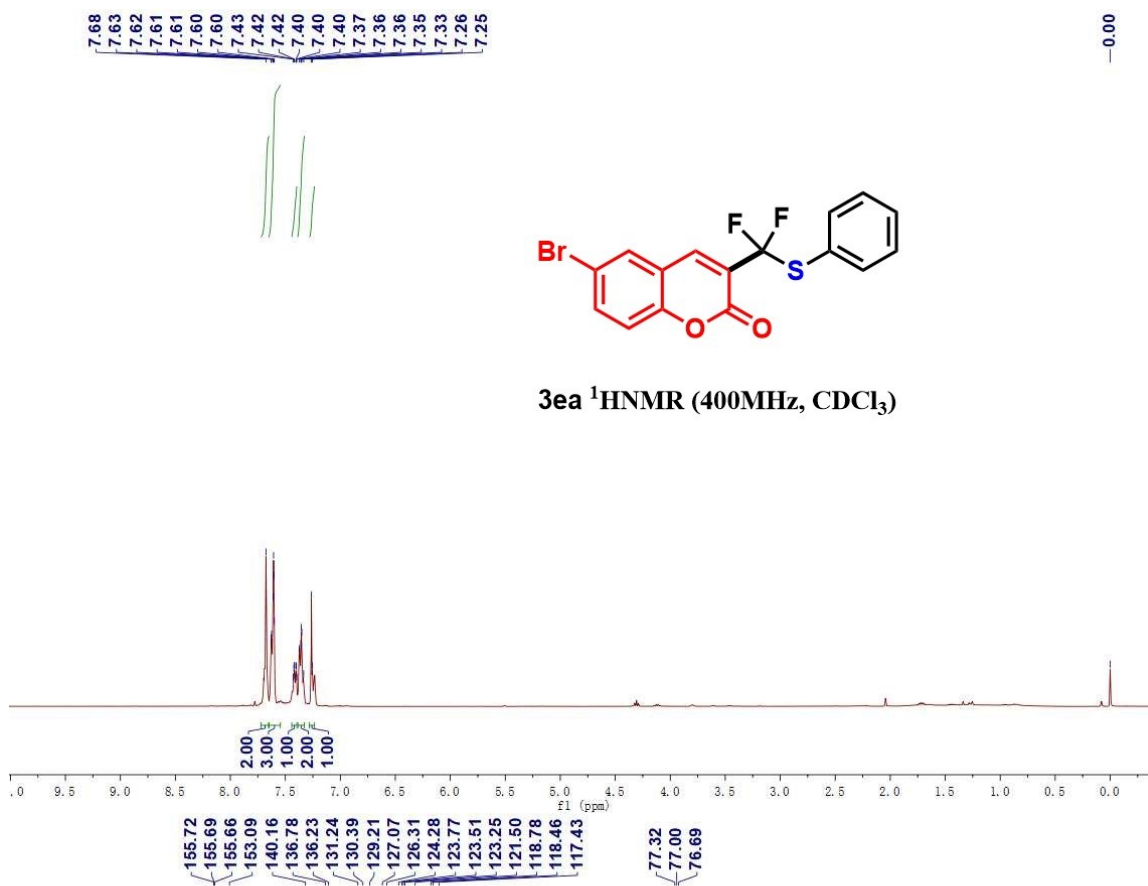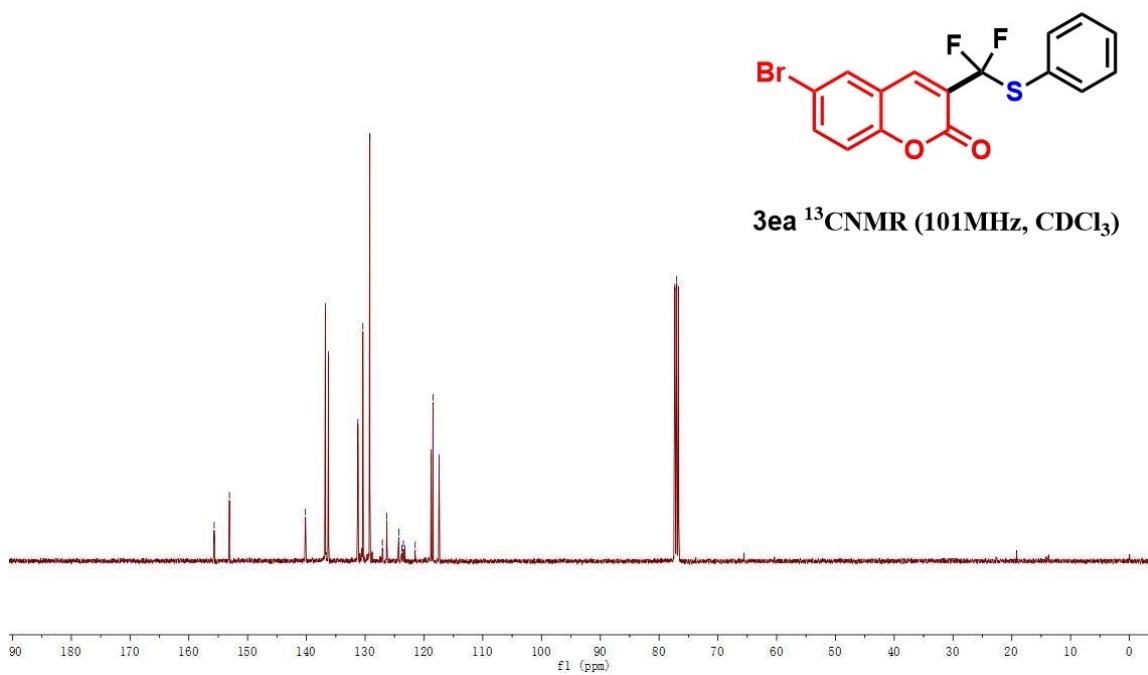

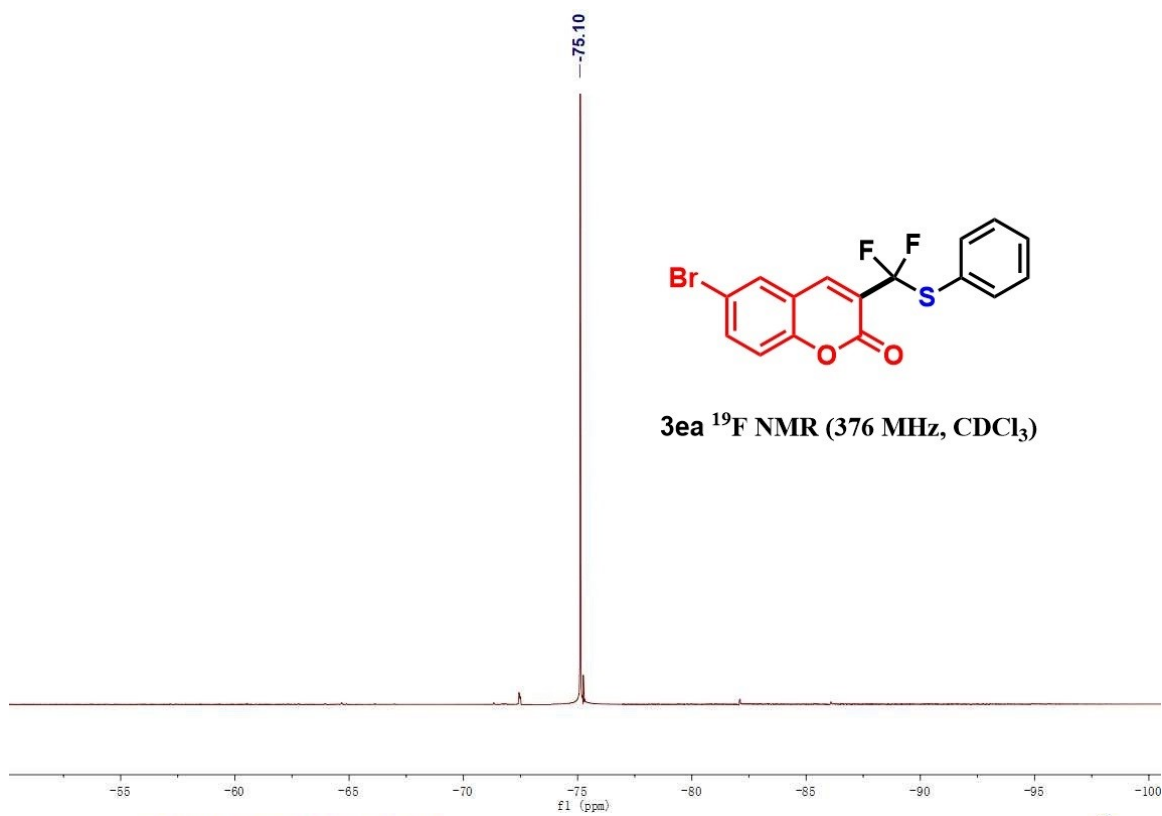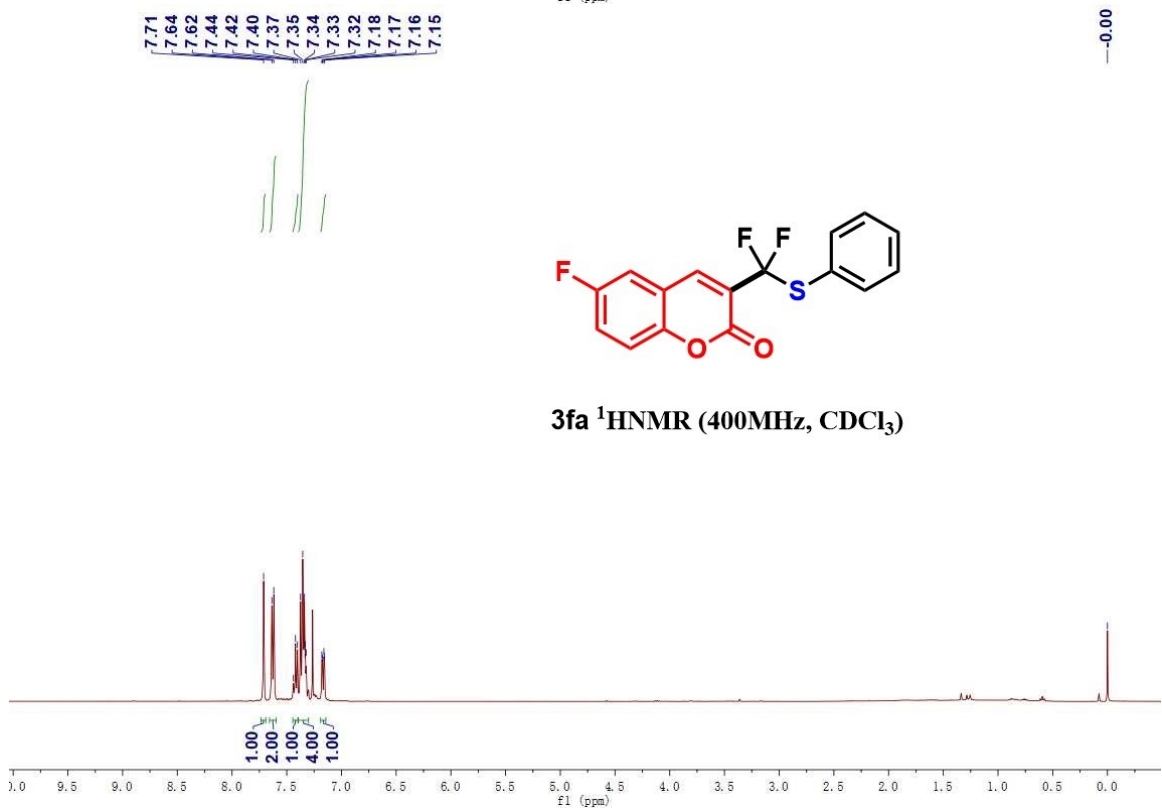

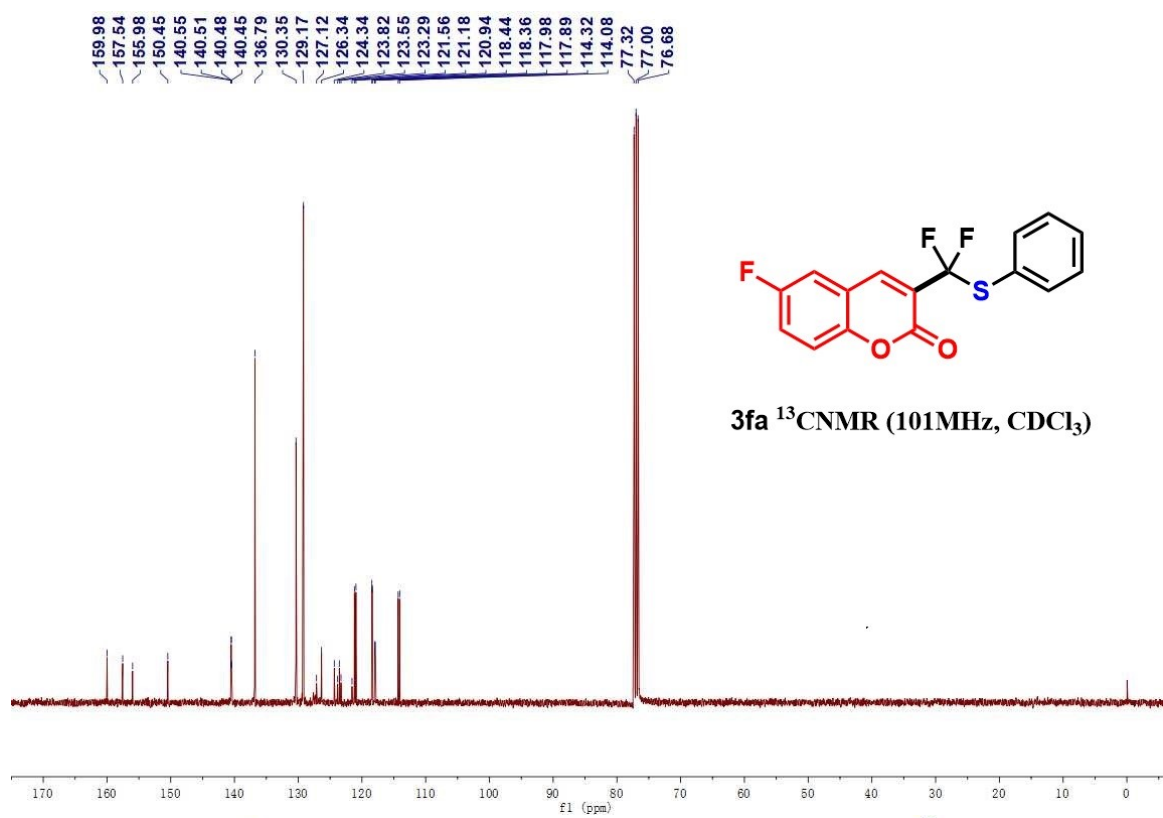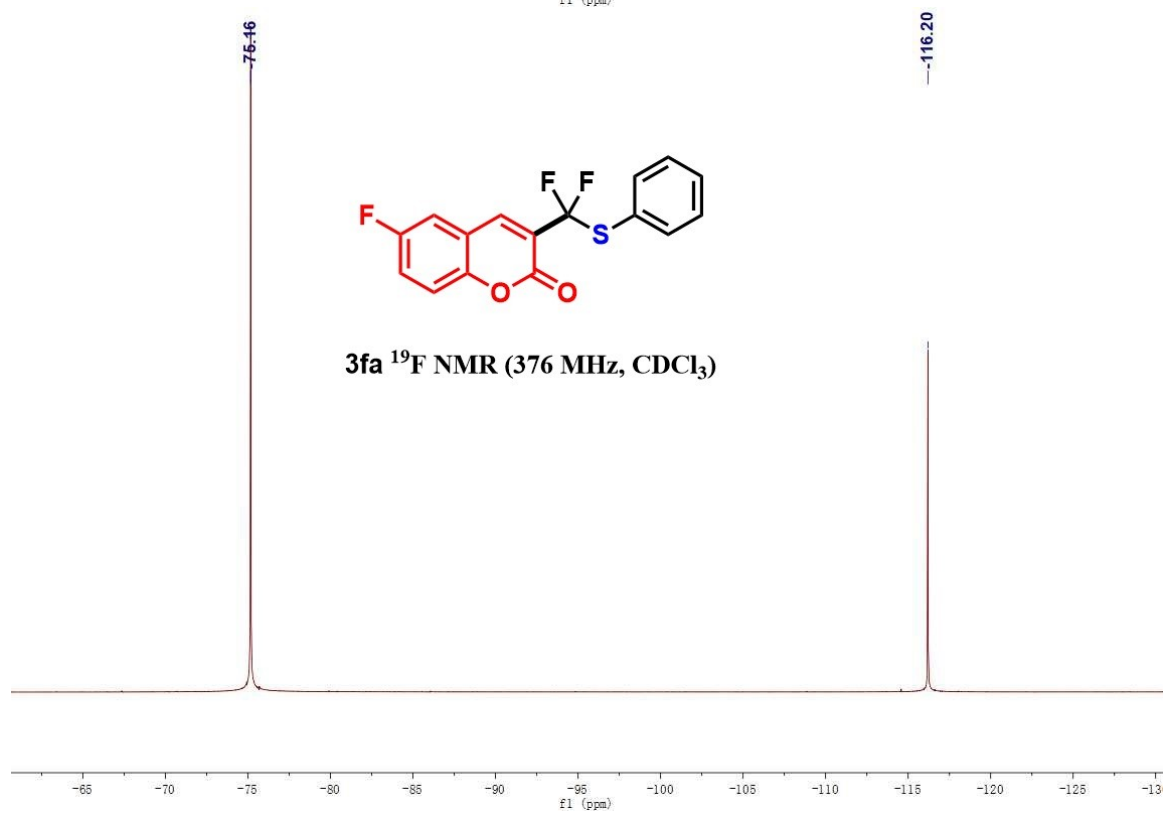

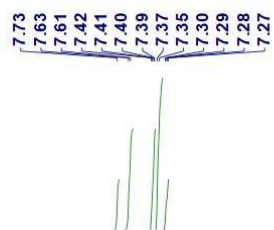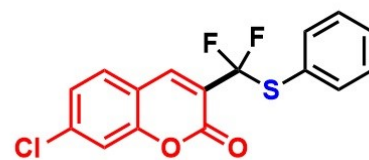

**3ga**  $^1\text{H NMR}$  (400MHz,  $\text{CDCl}_3$ )

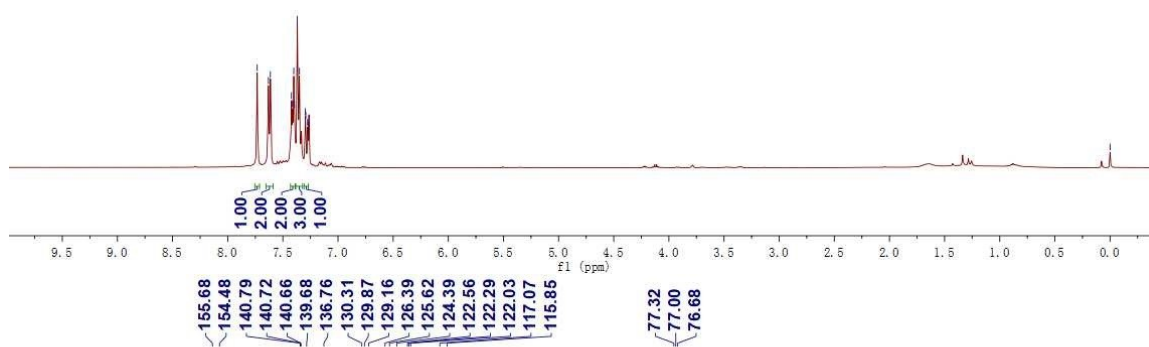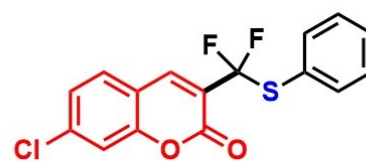

**3ga**  $^{13}\text{C NMR}$  (101MHz,  $\text{CDCl}_3$ )

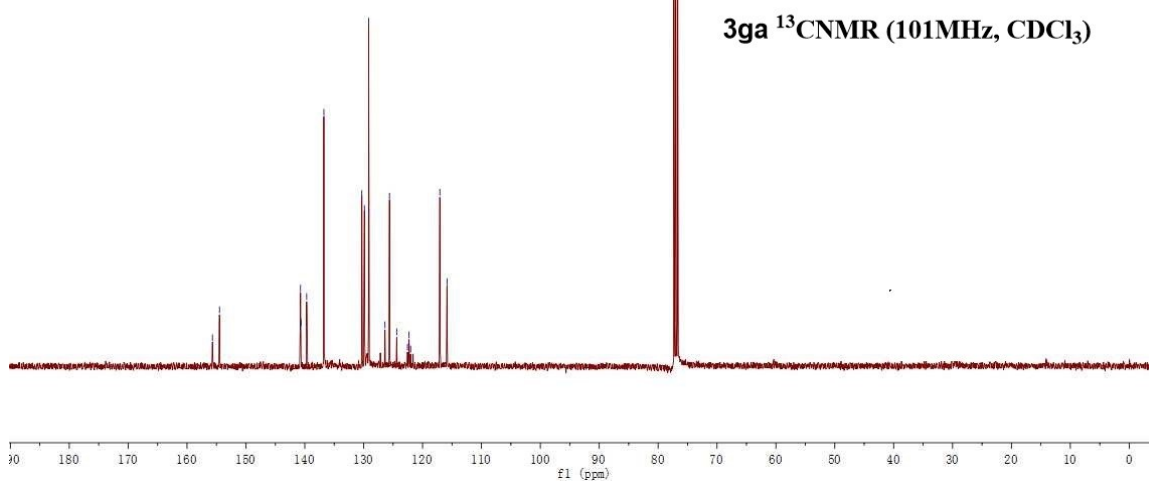

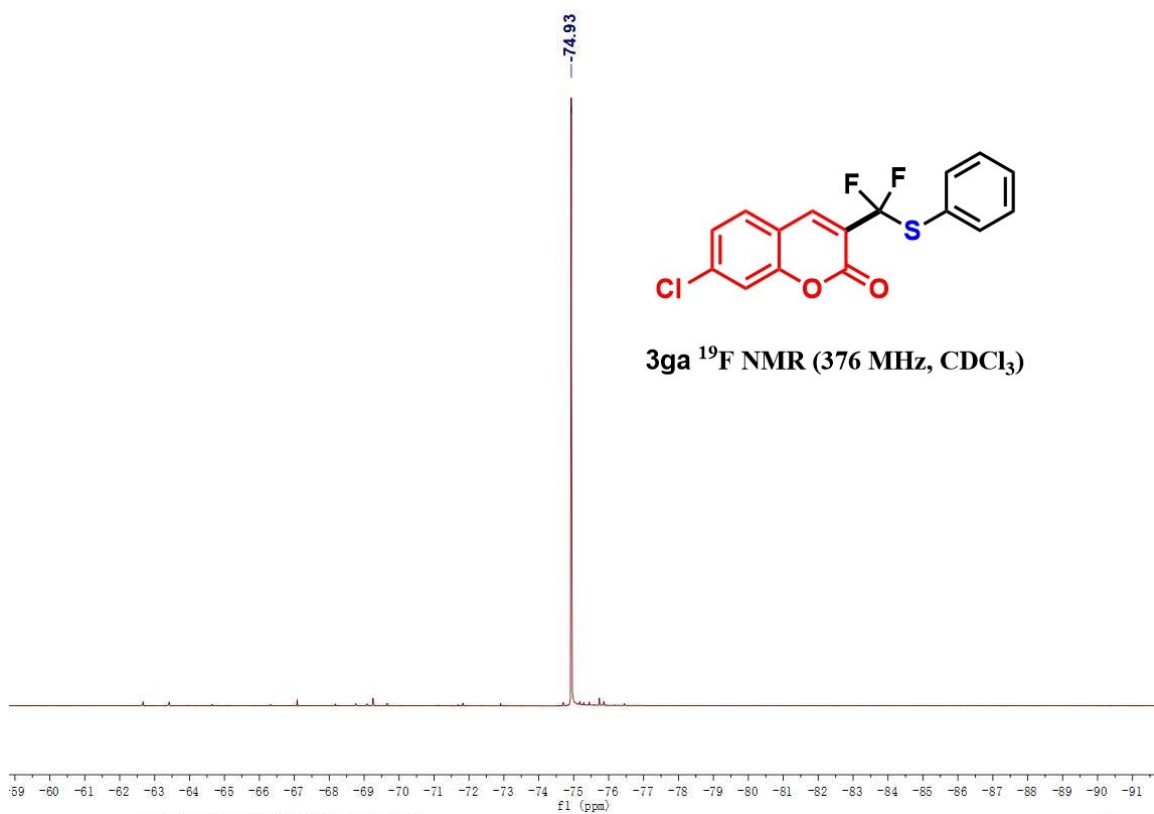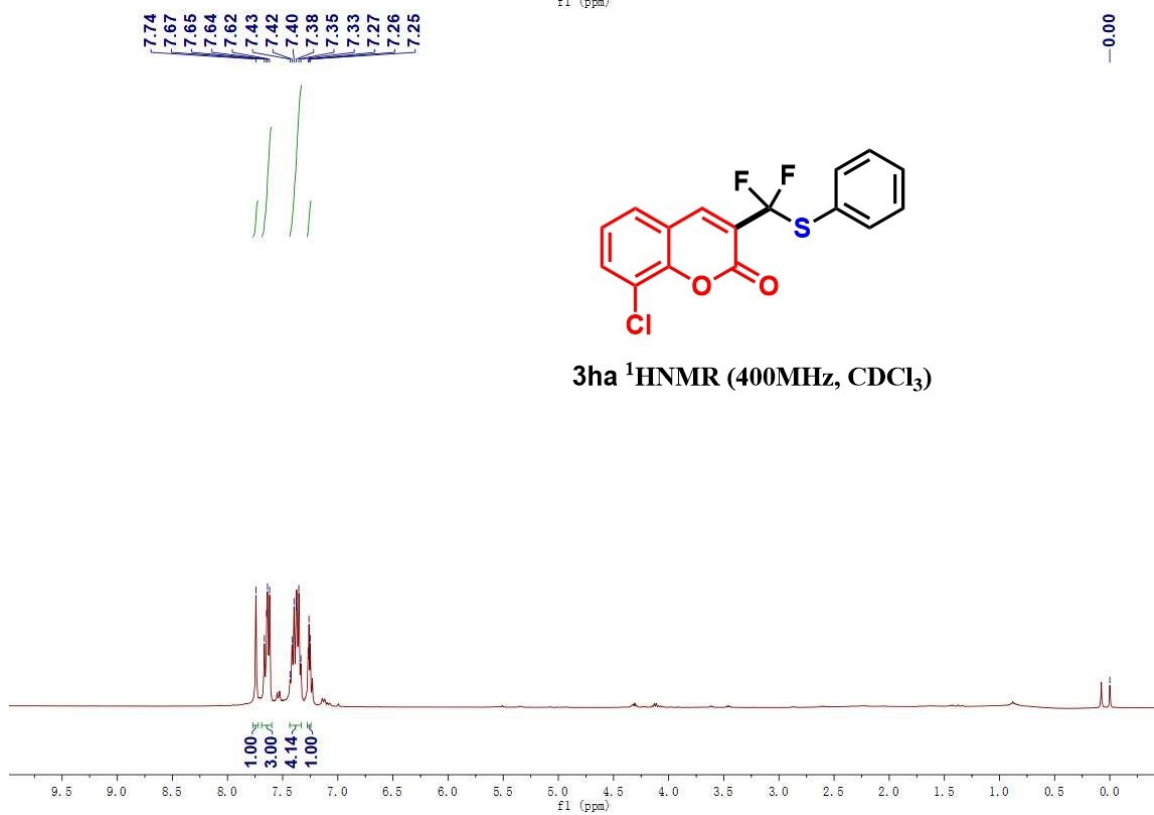

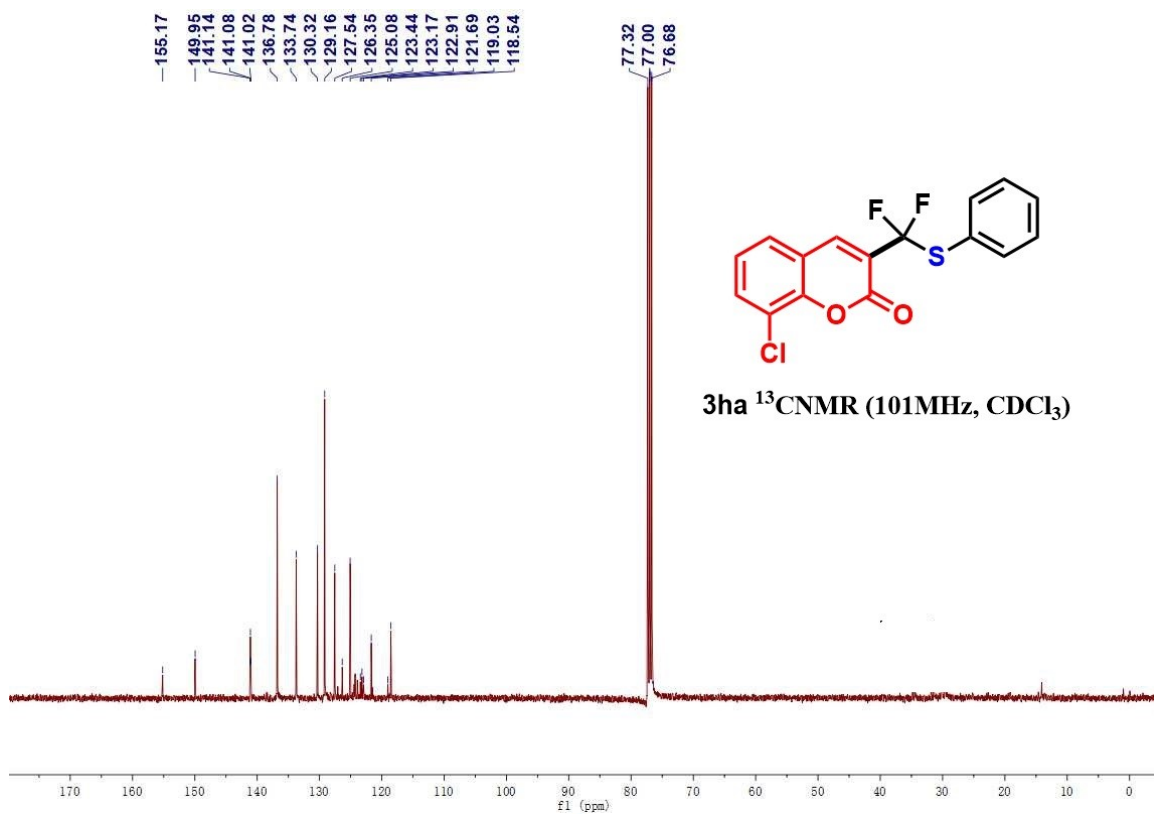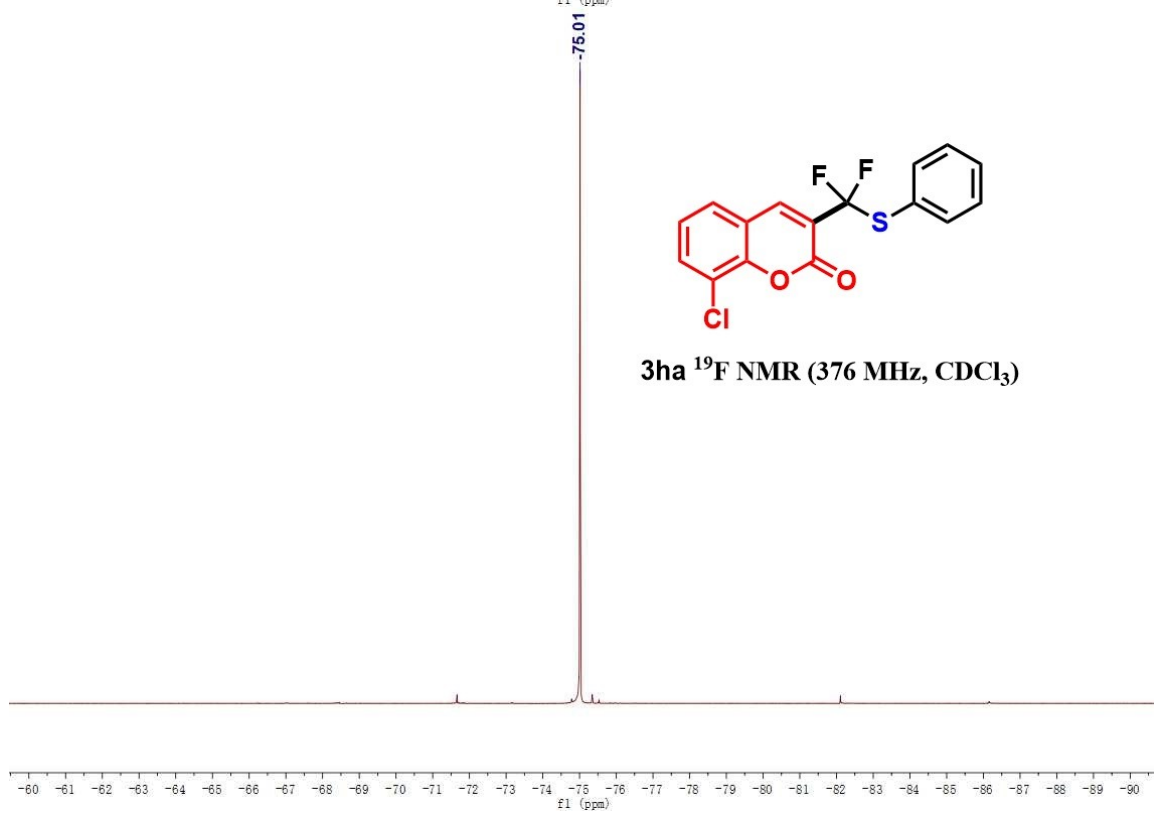

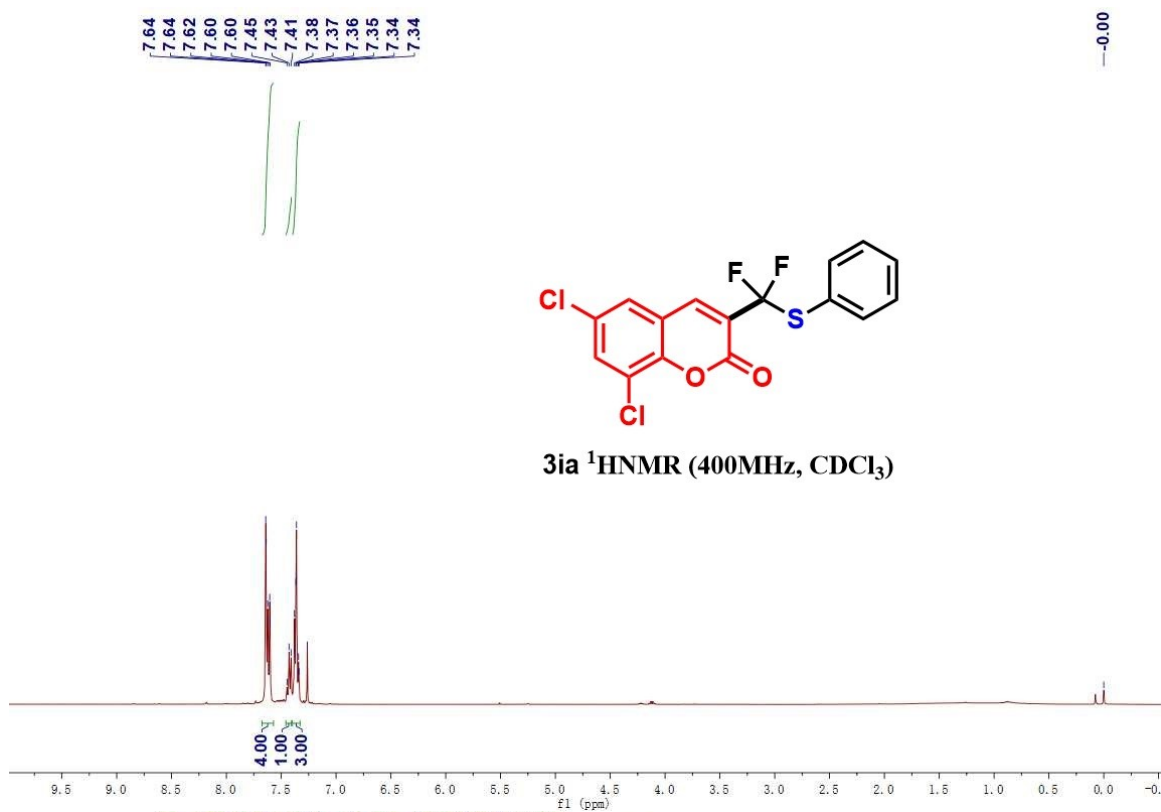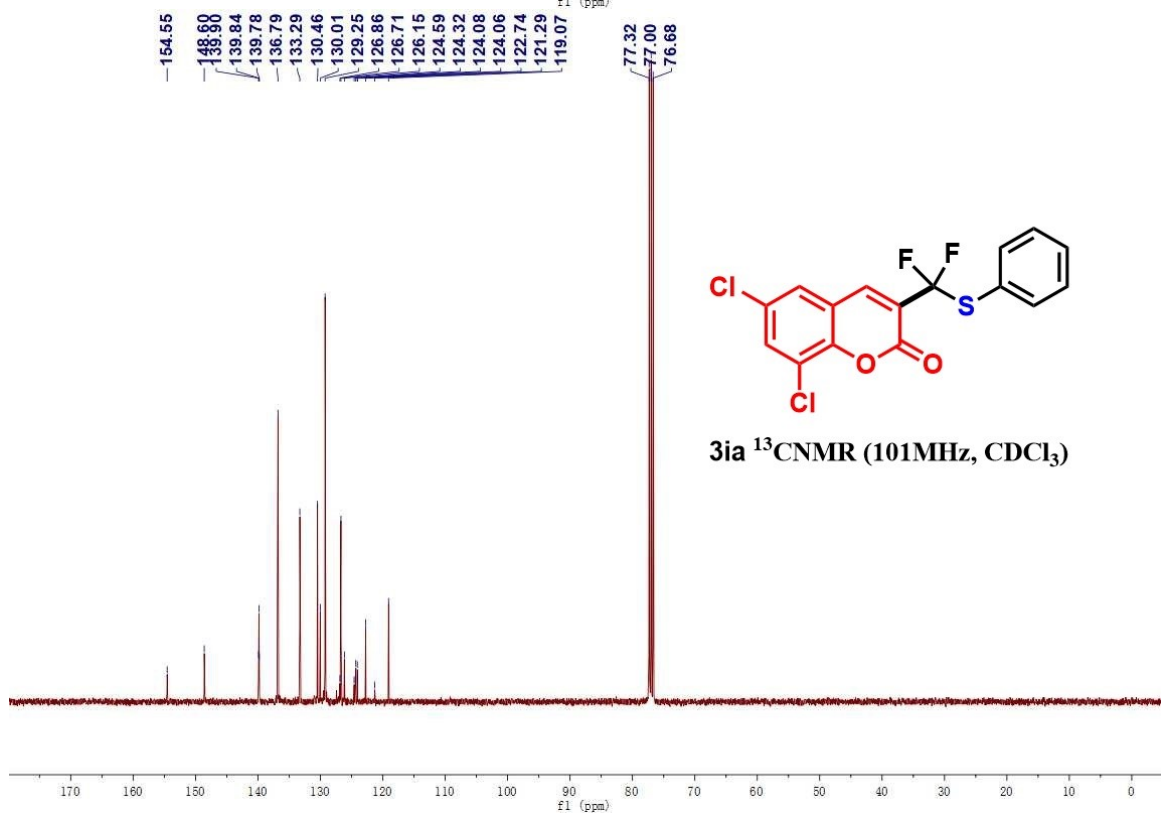

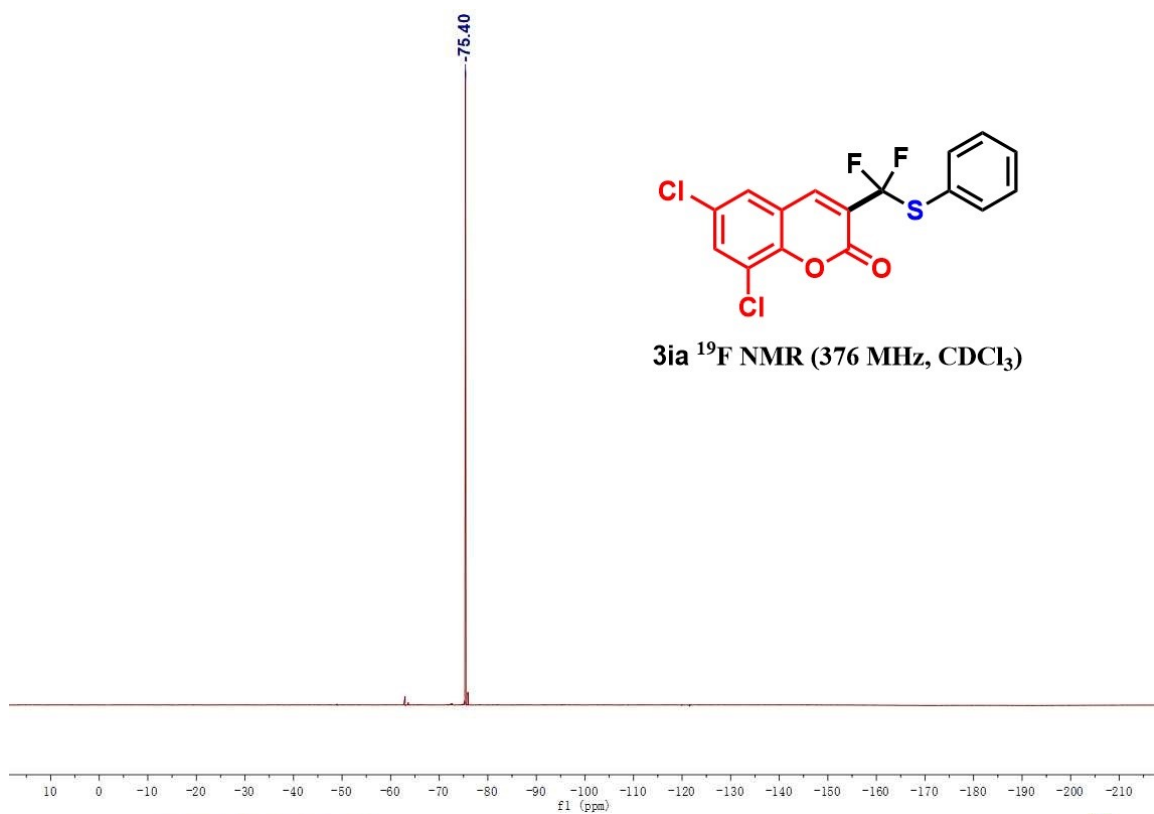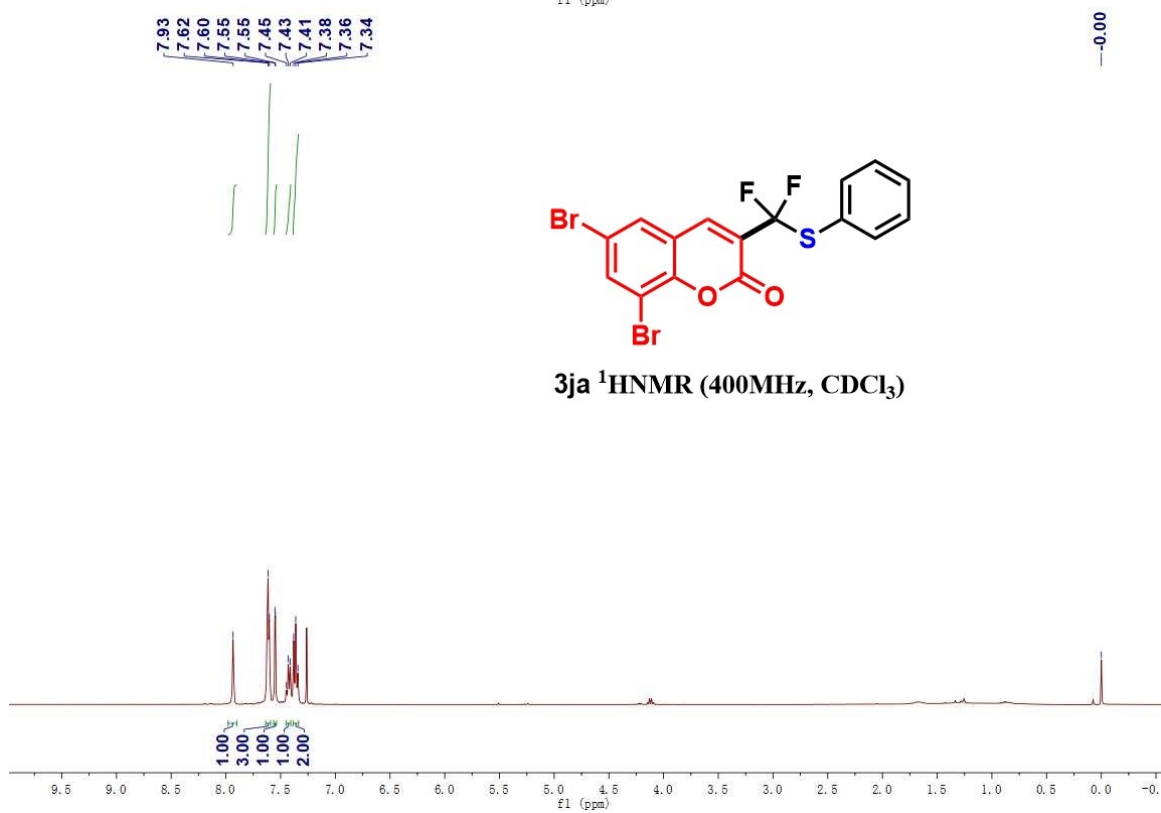

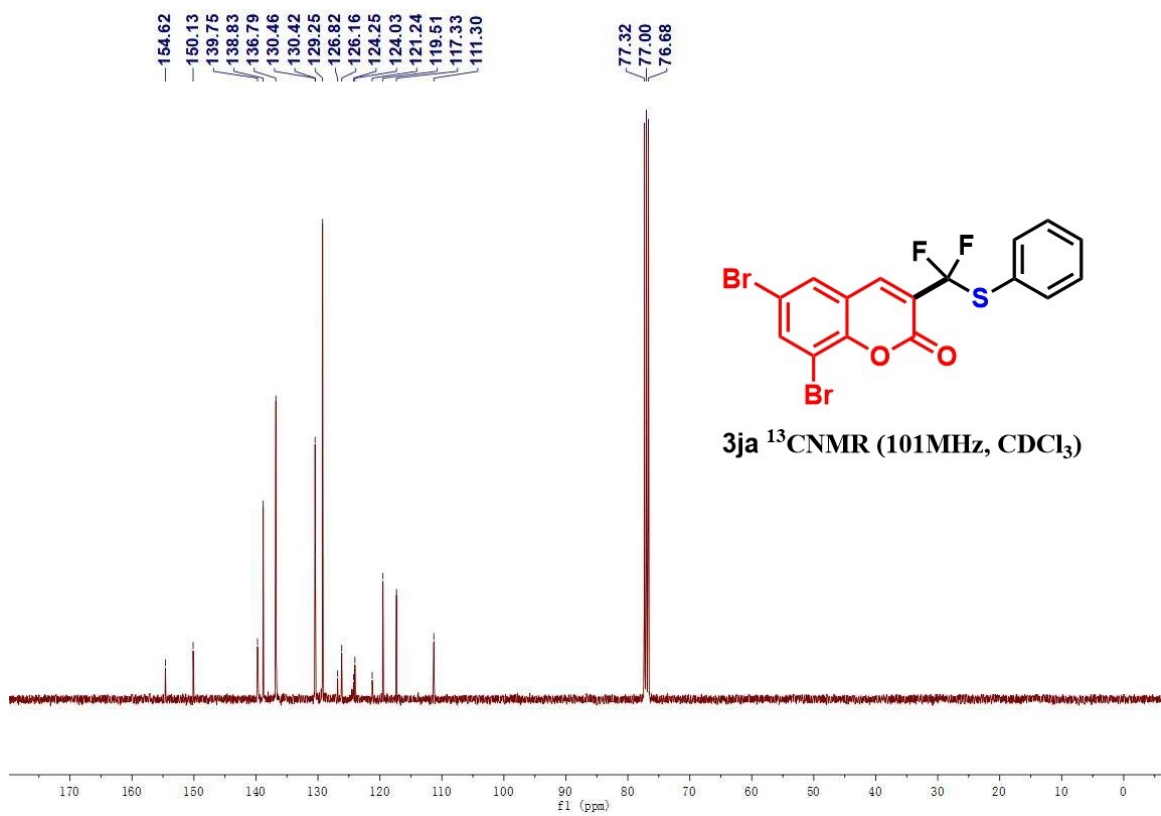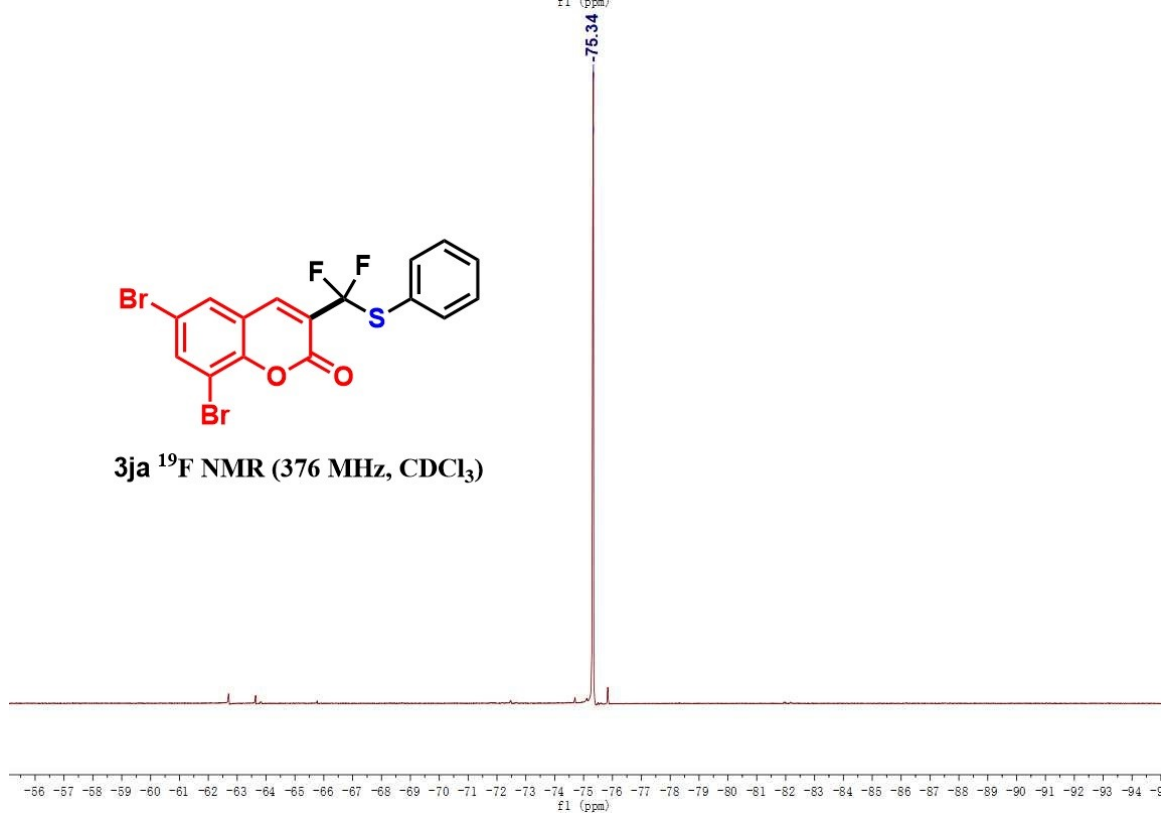

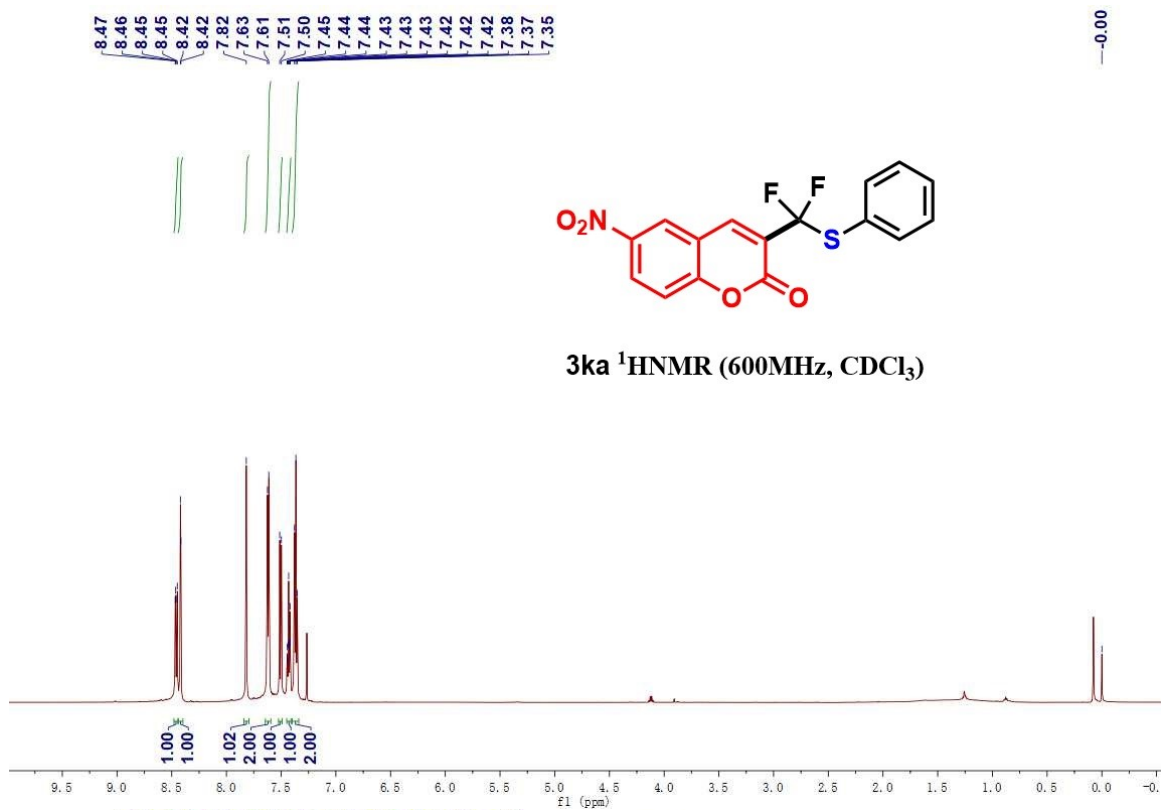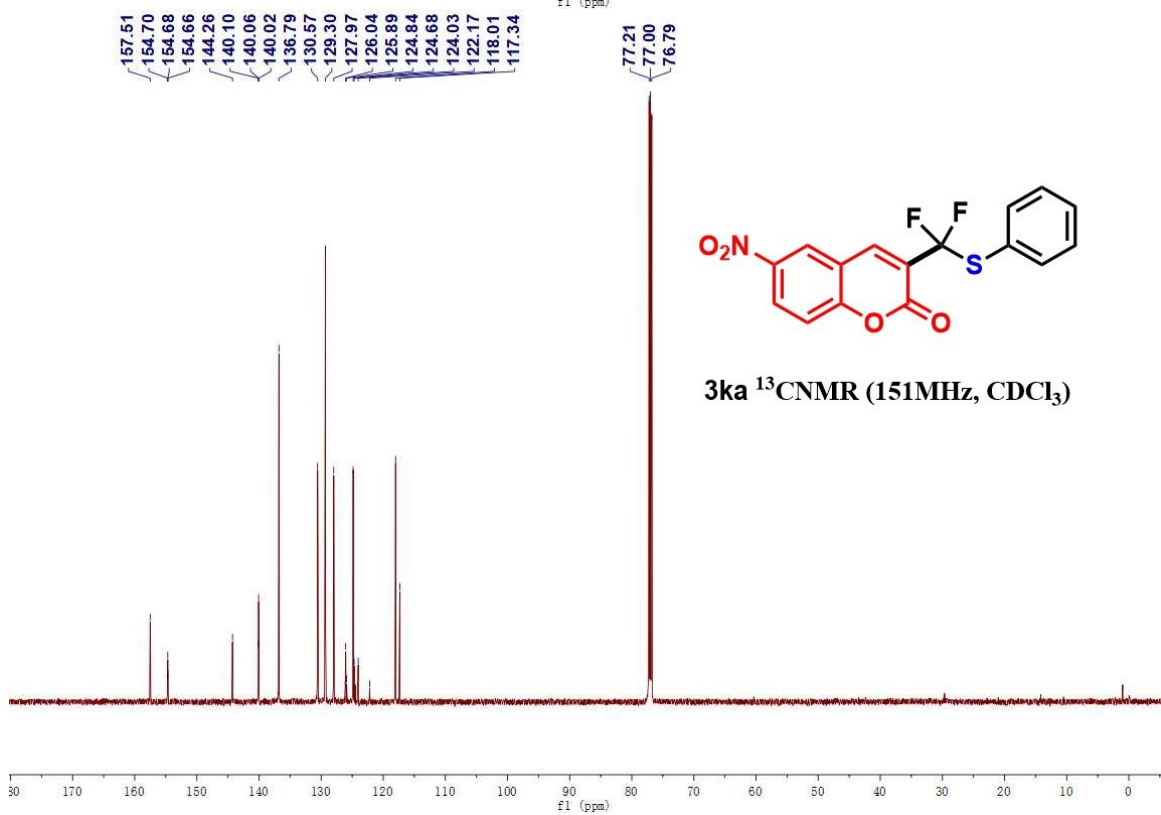

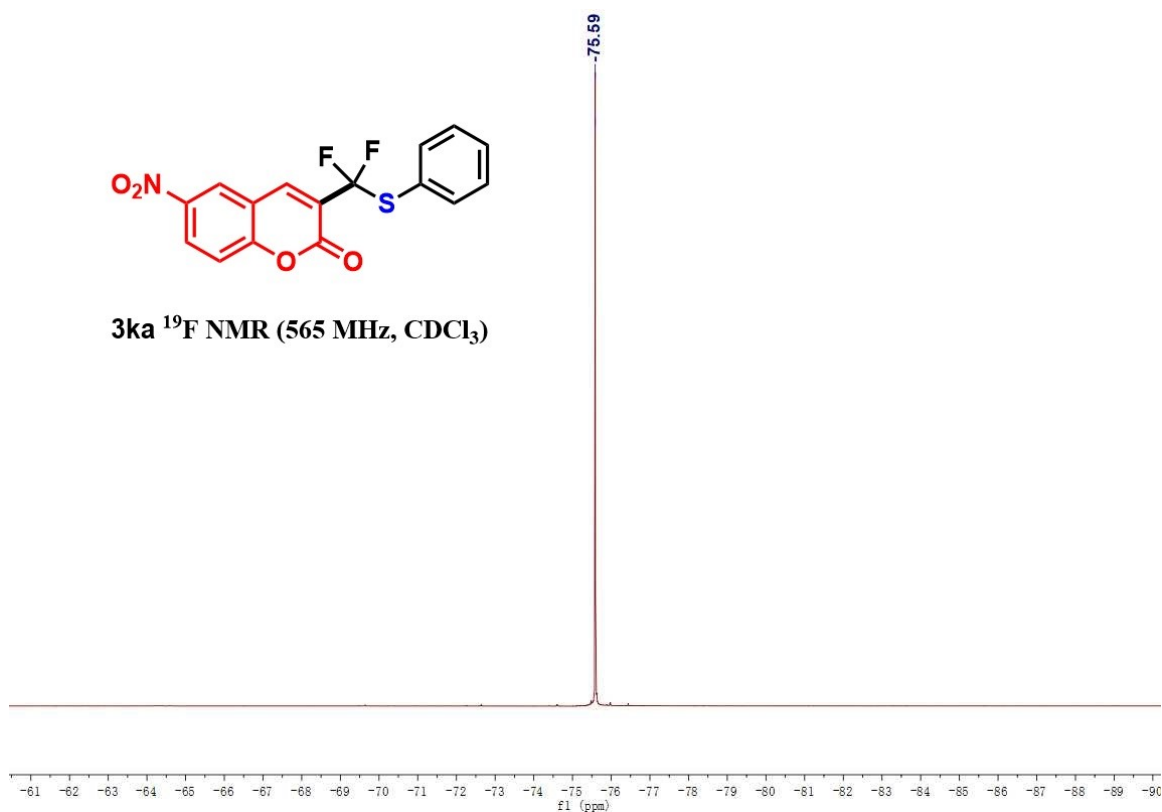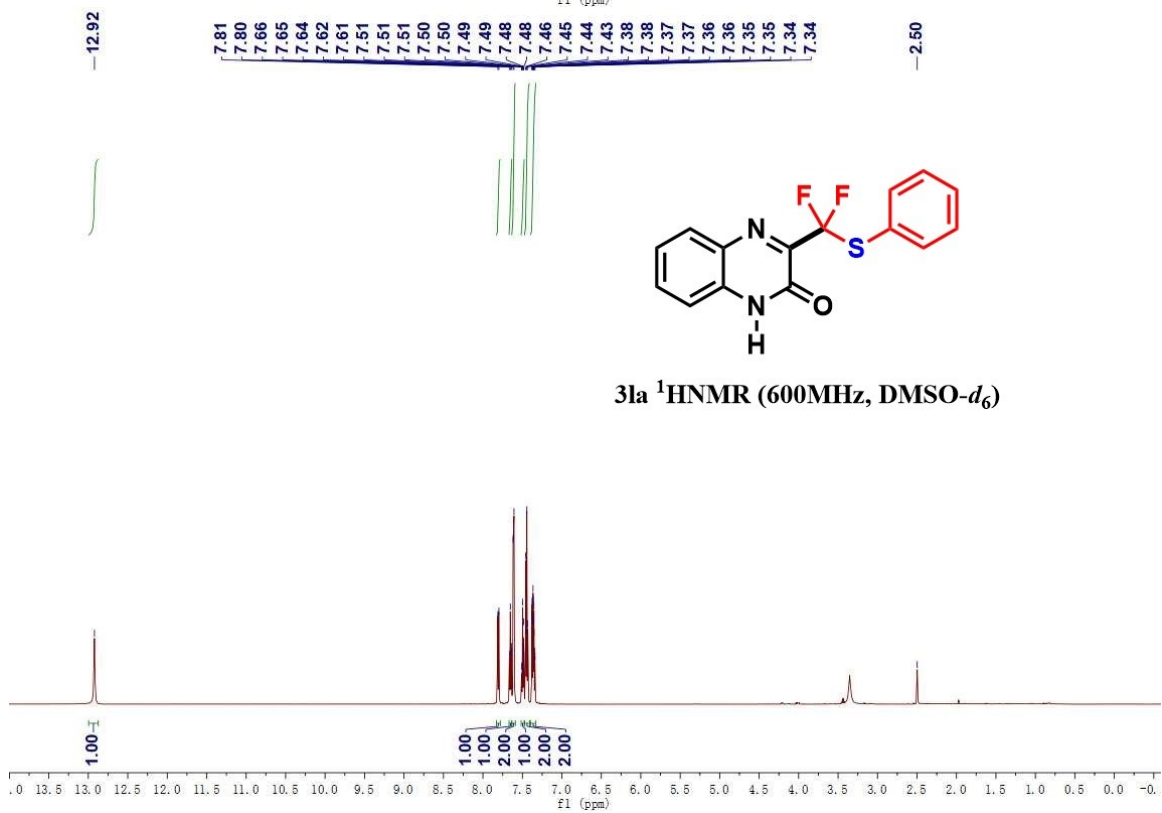

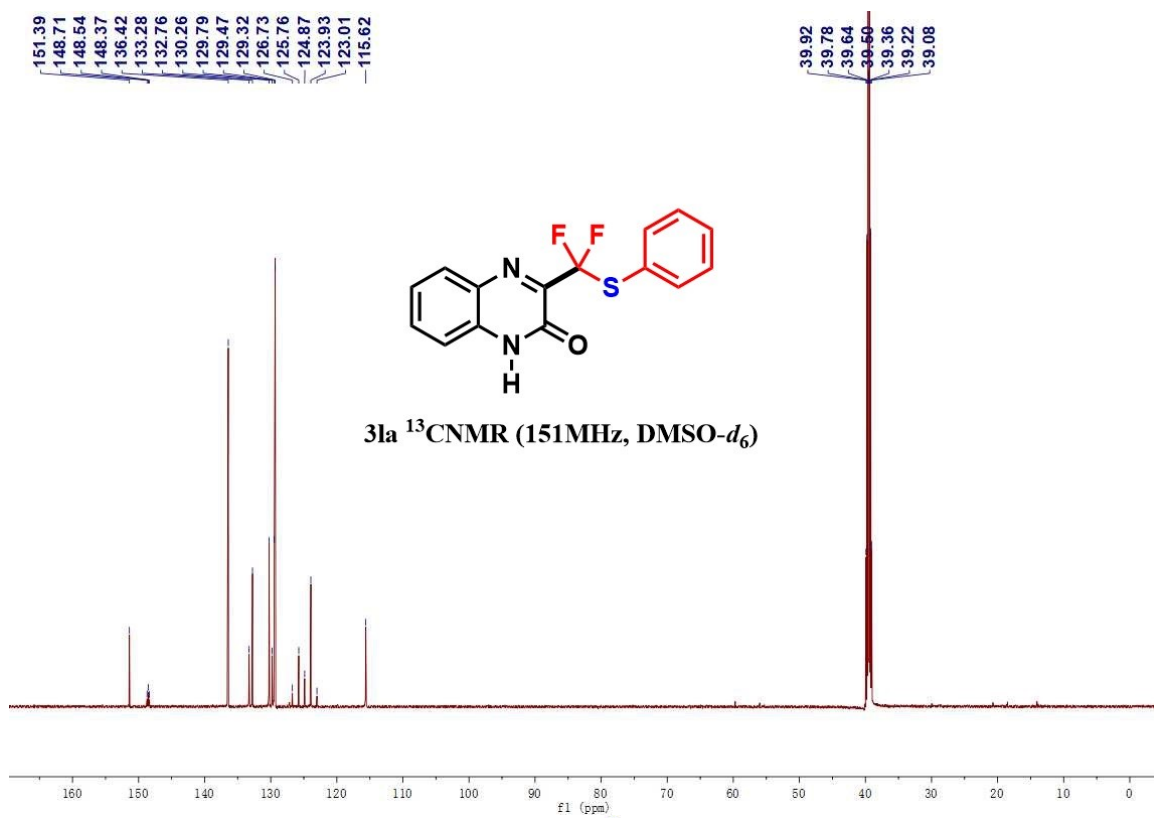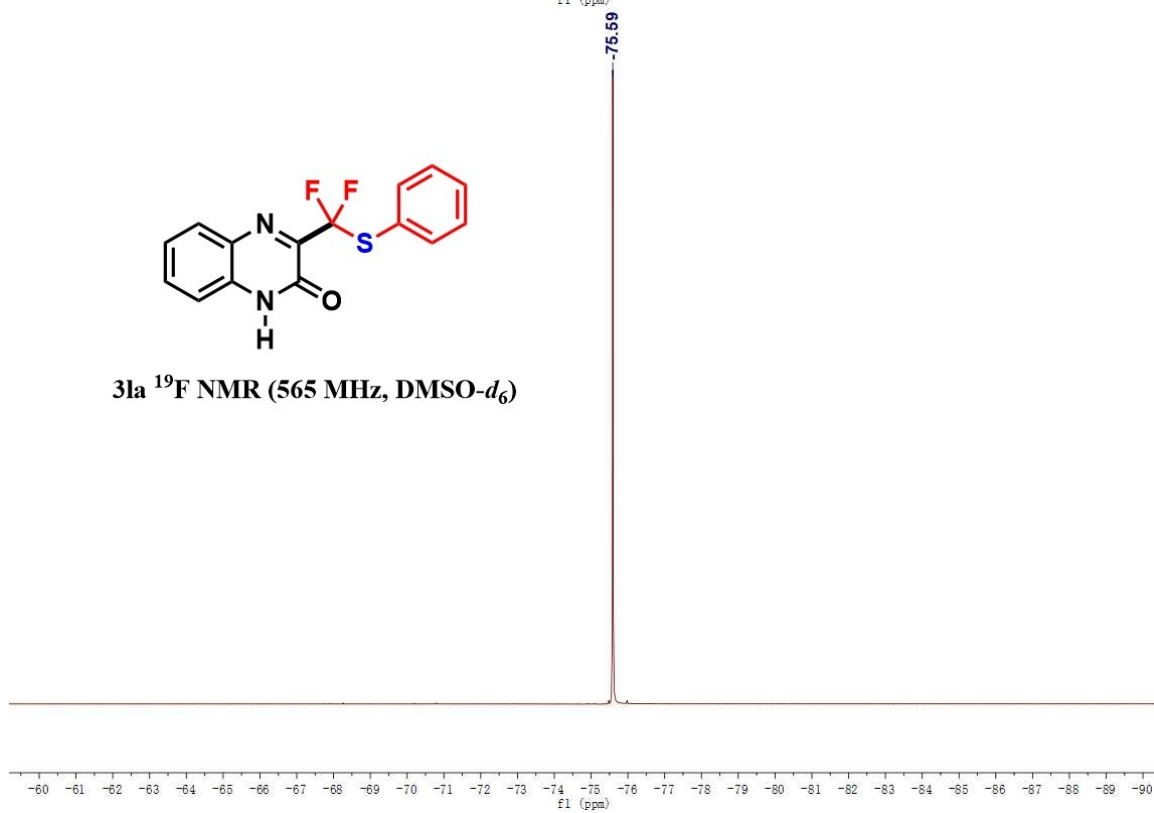

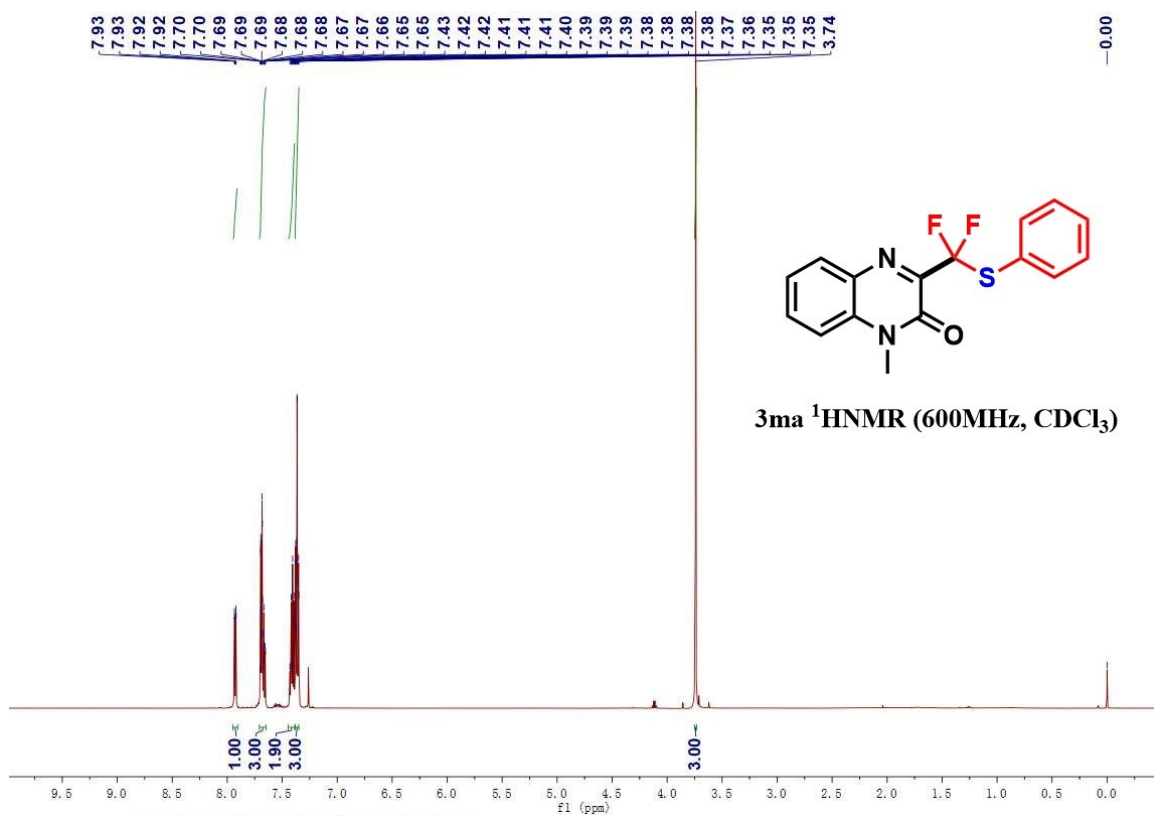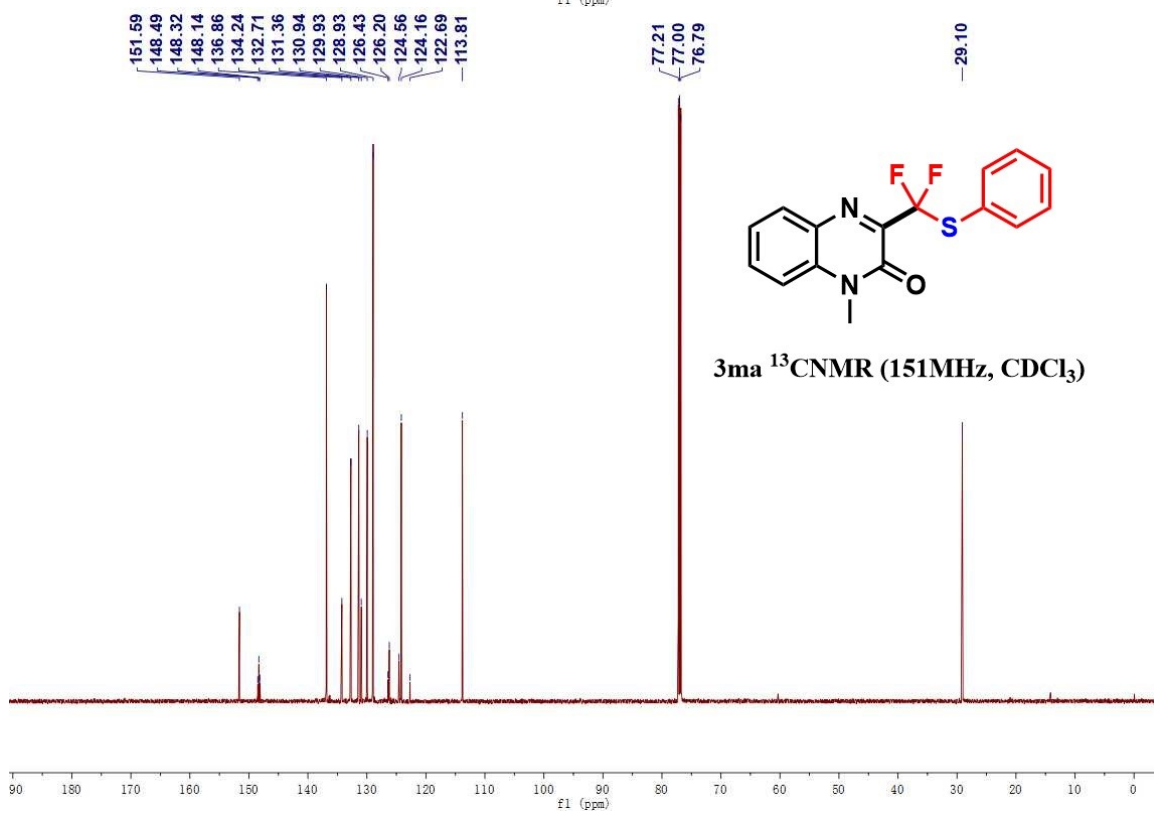

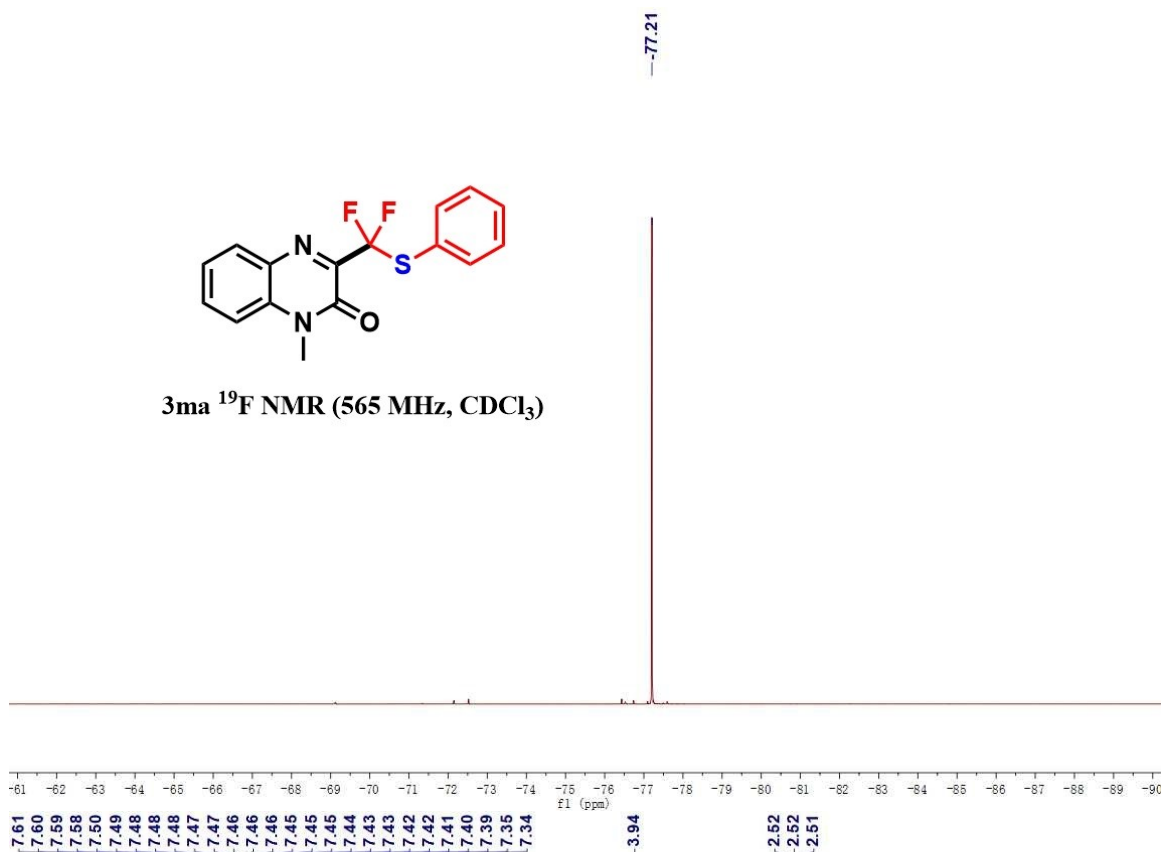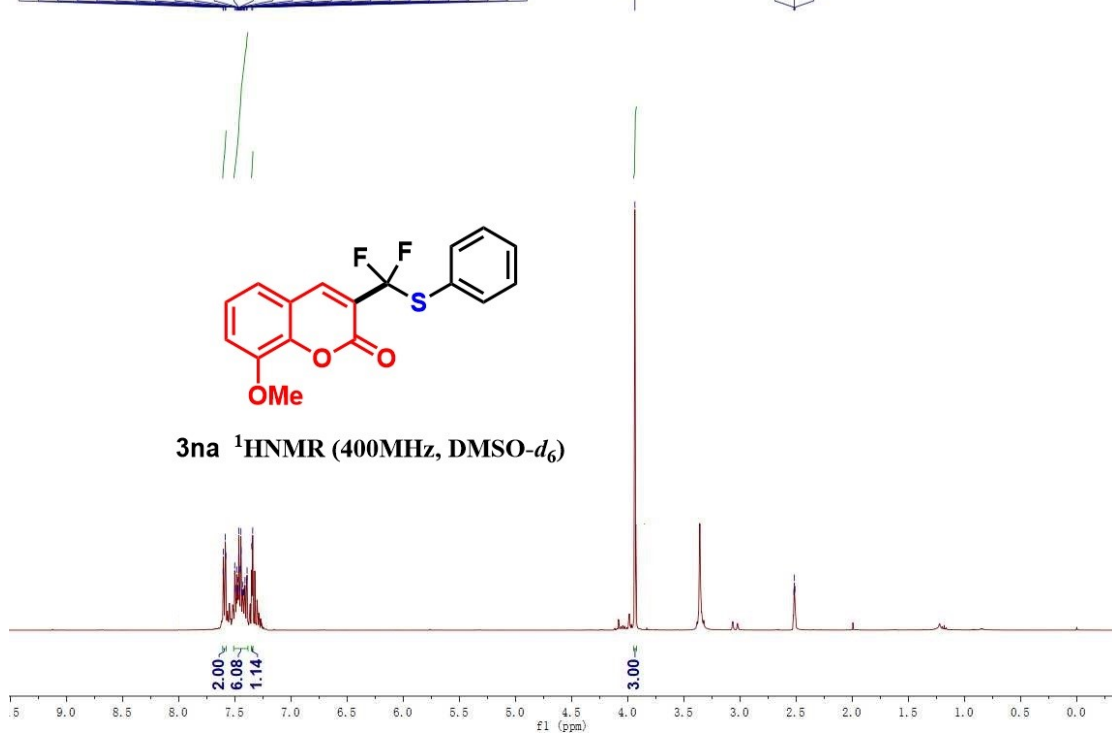

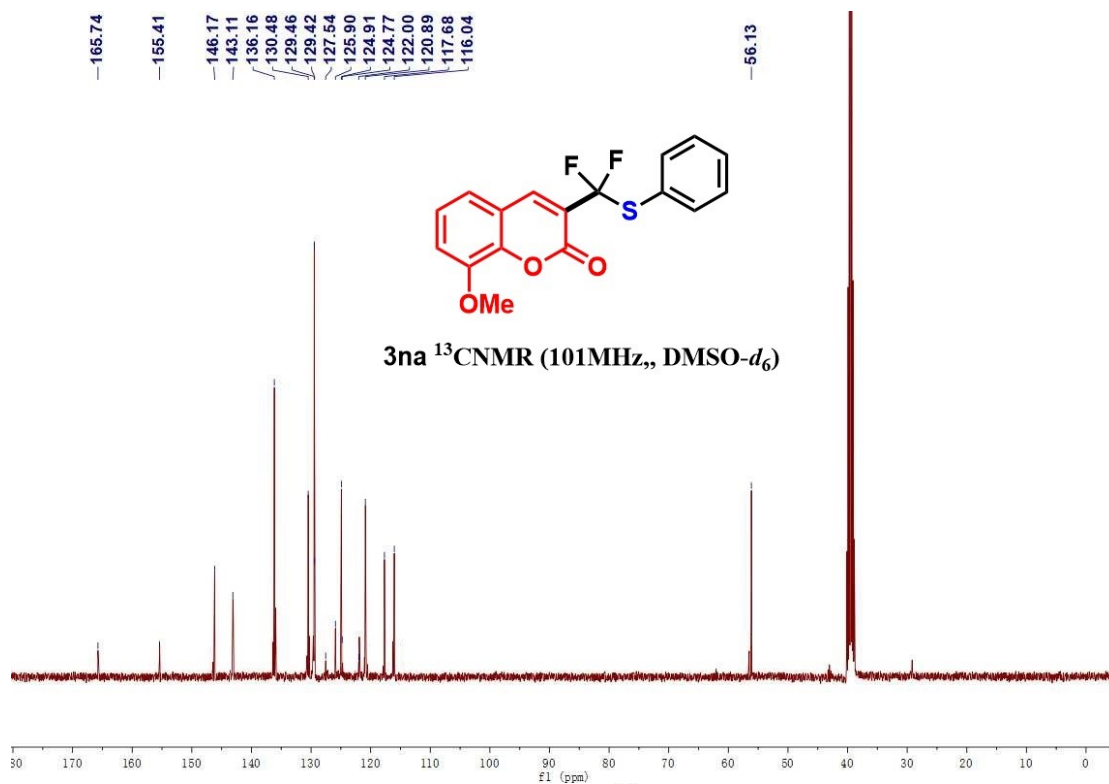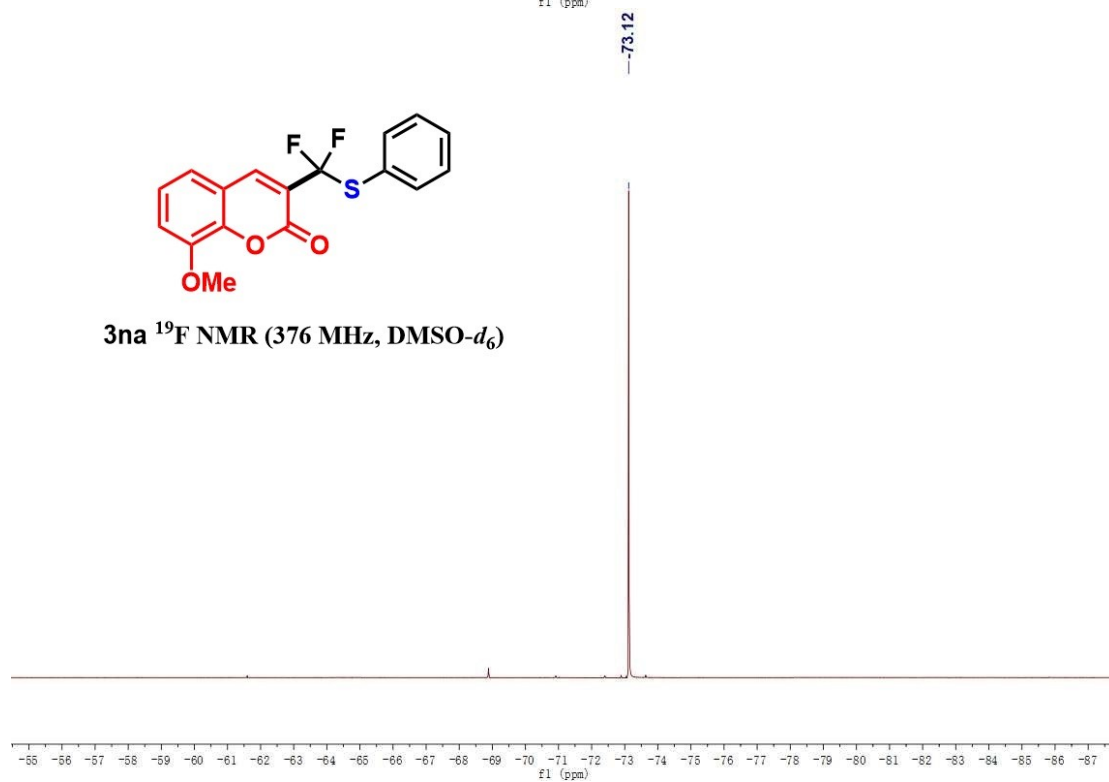

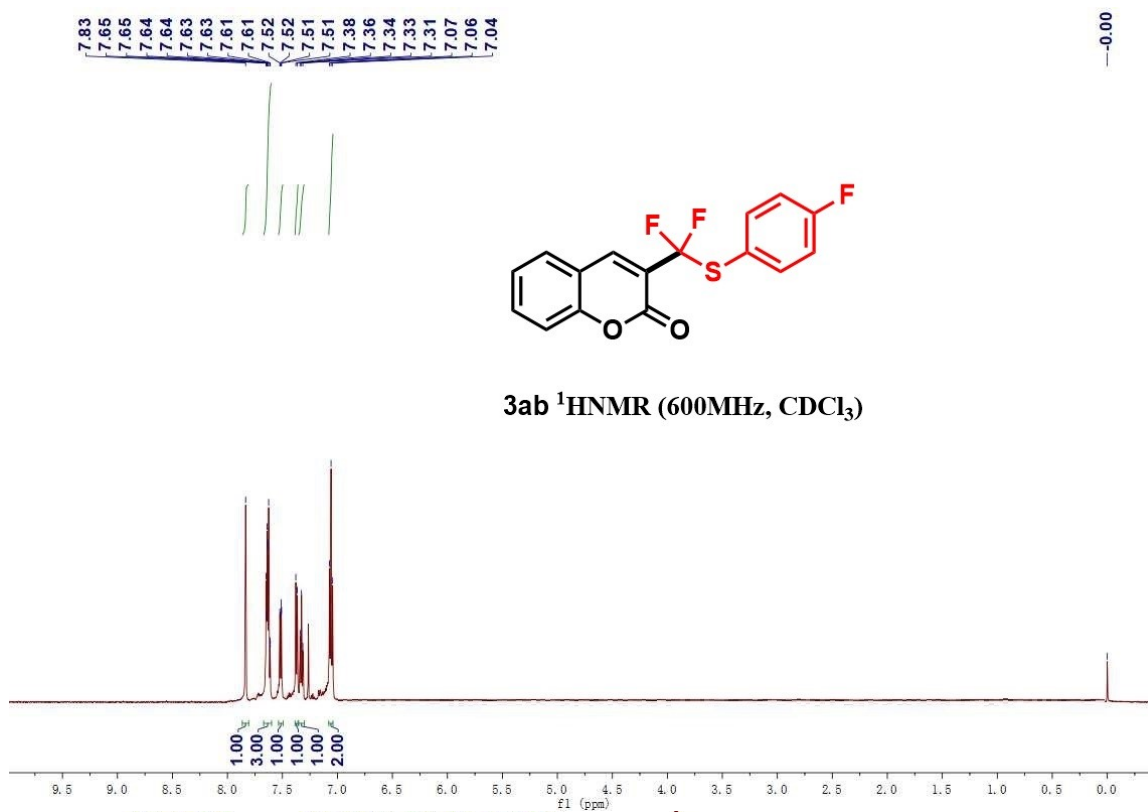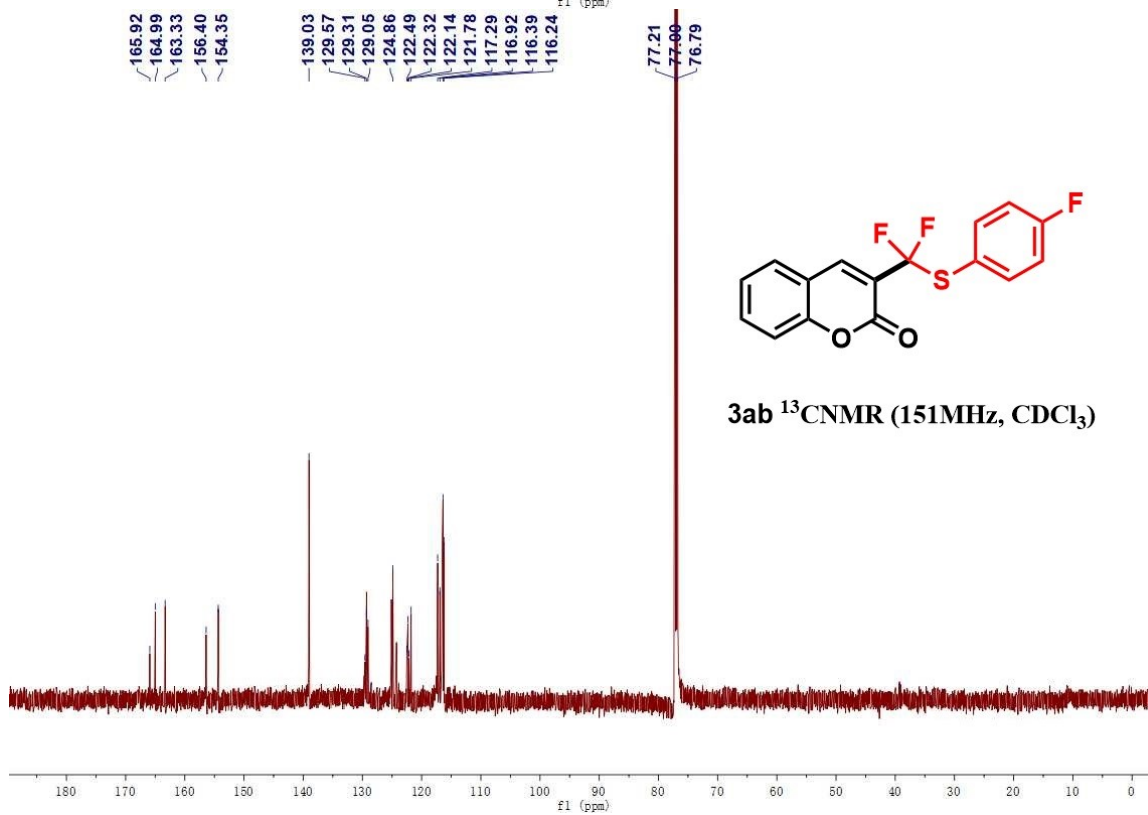

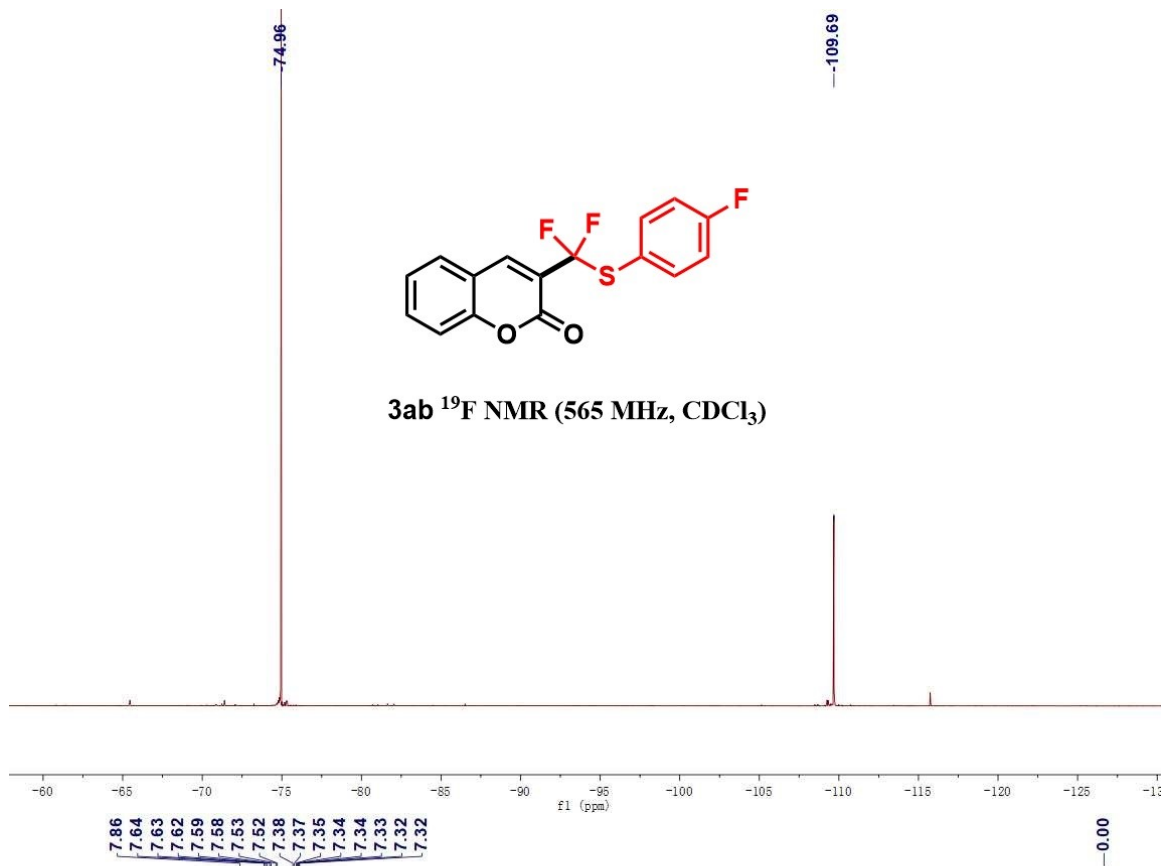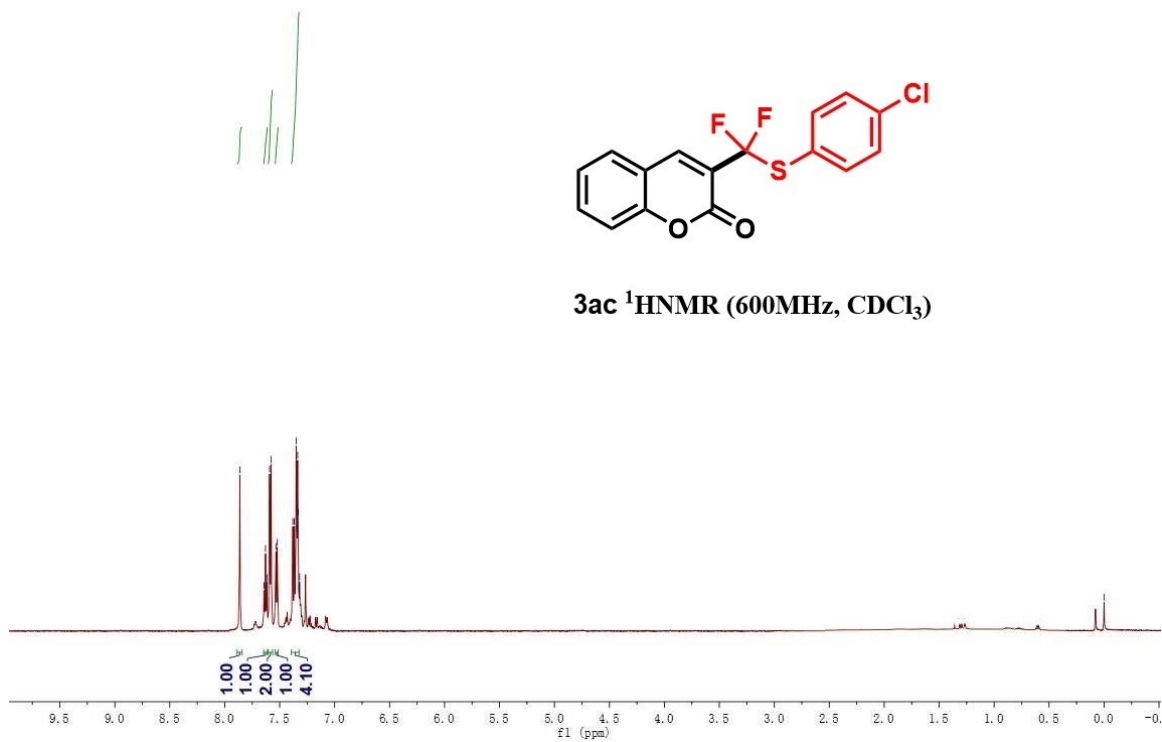

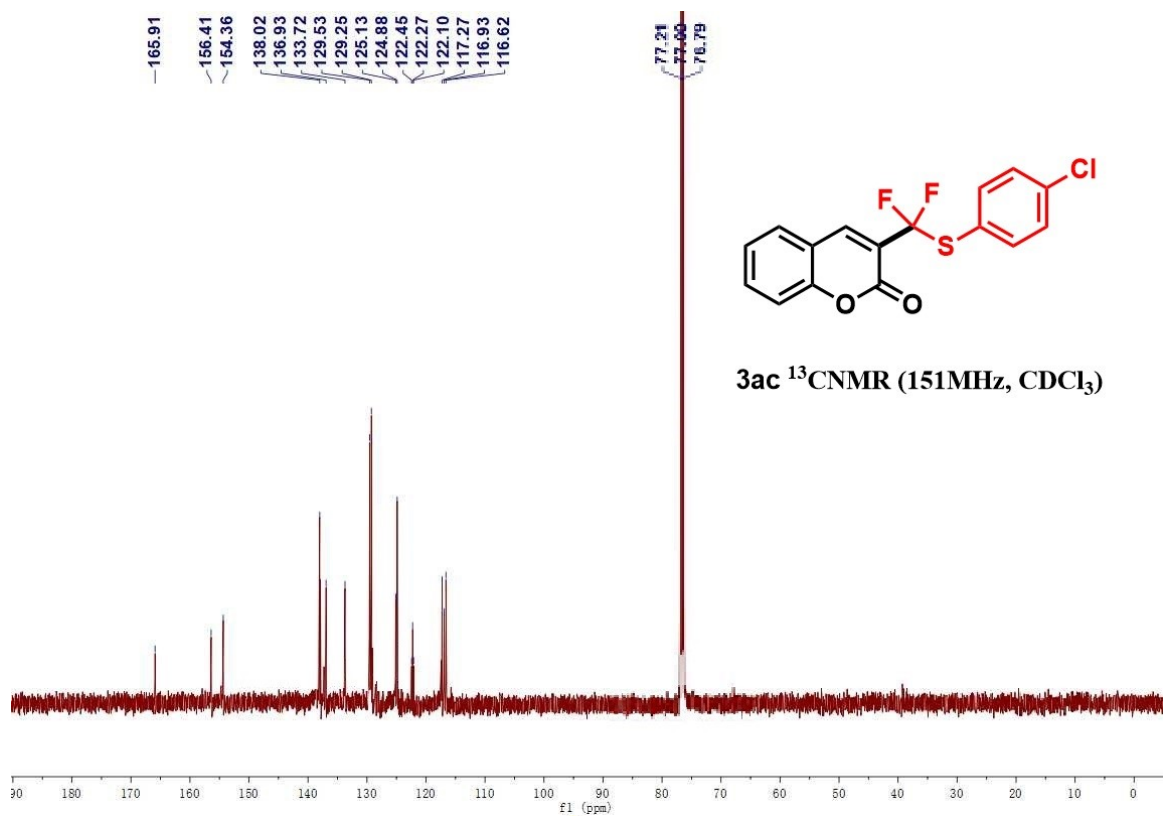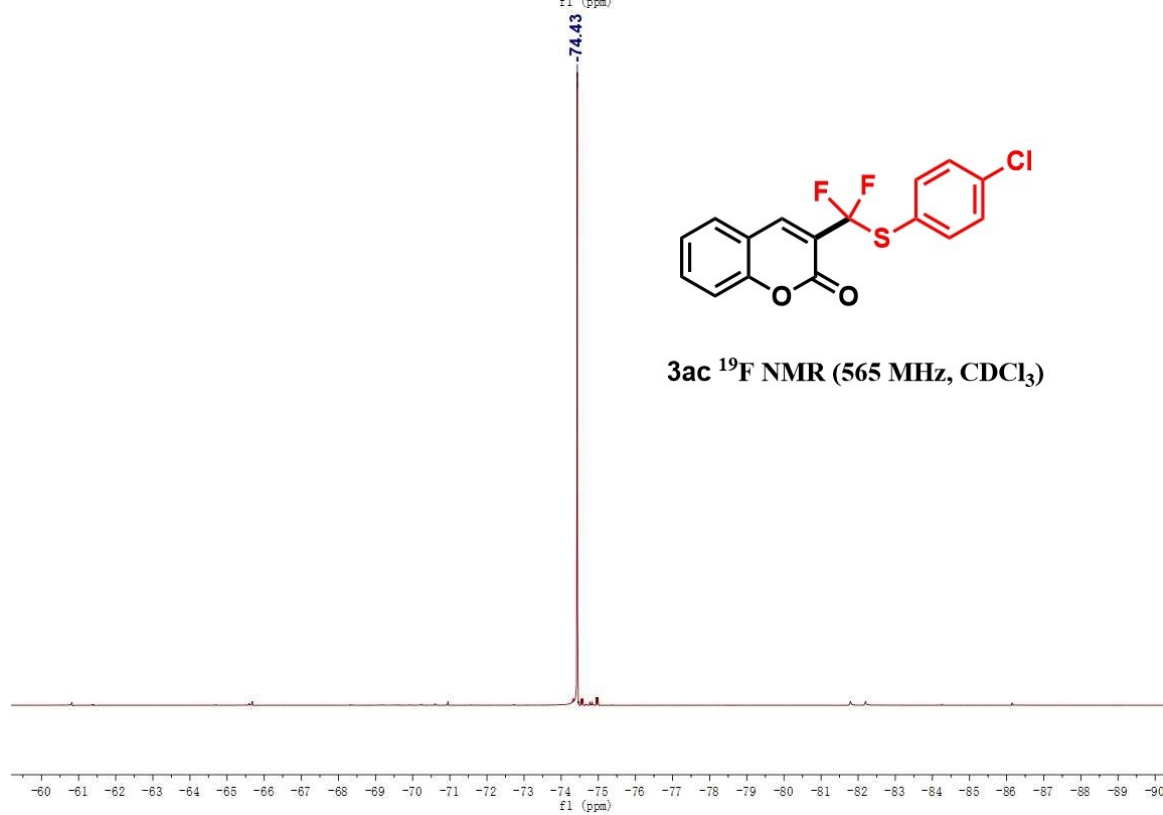

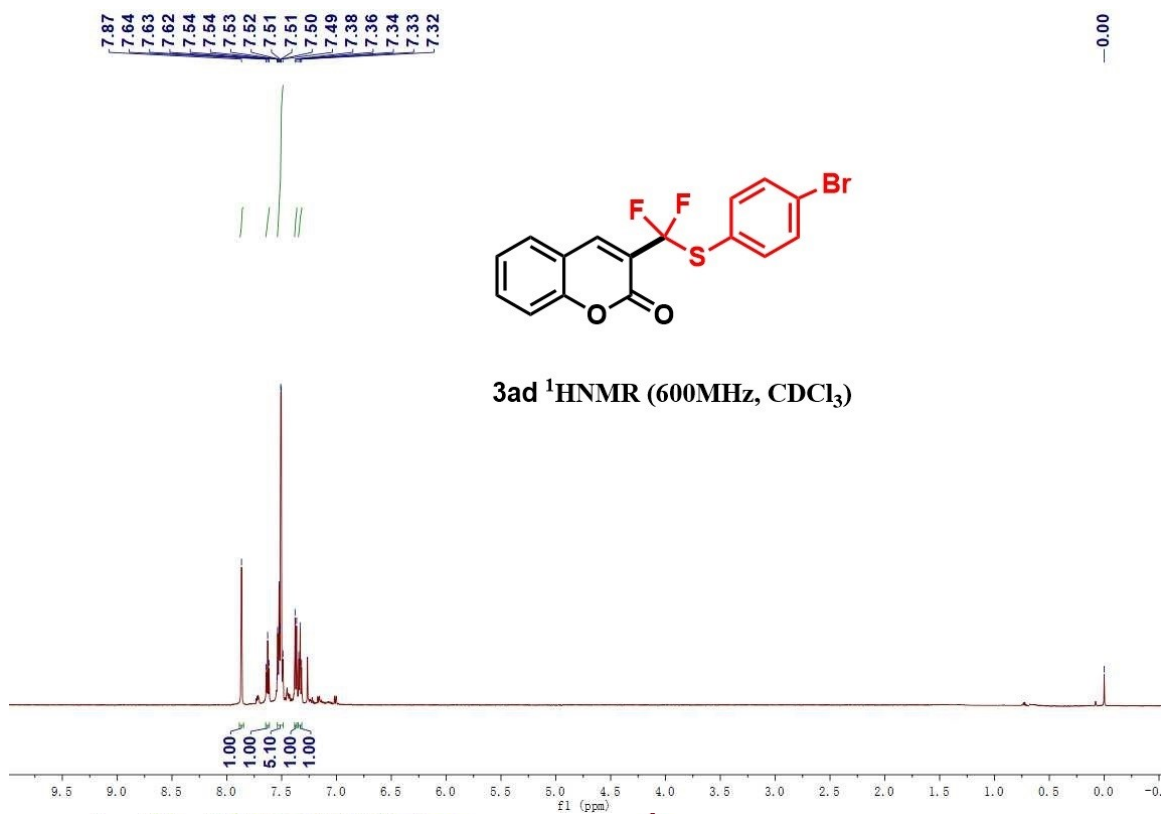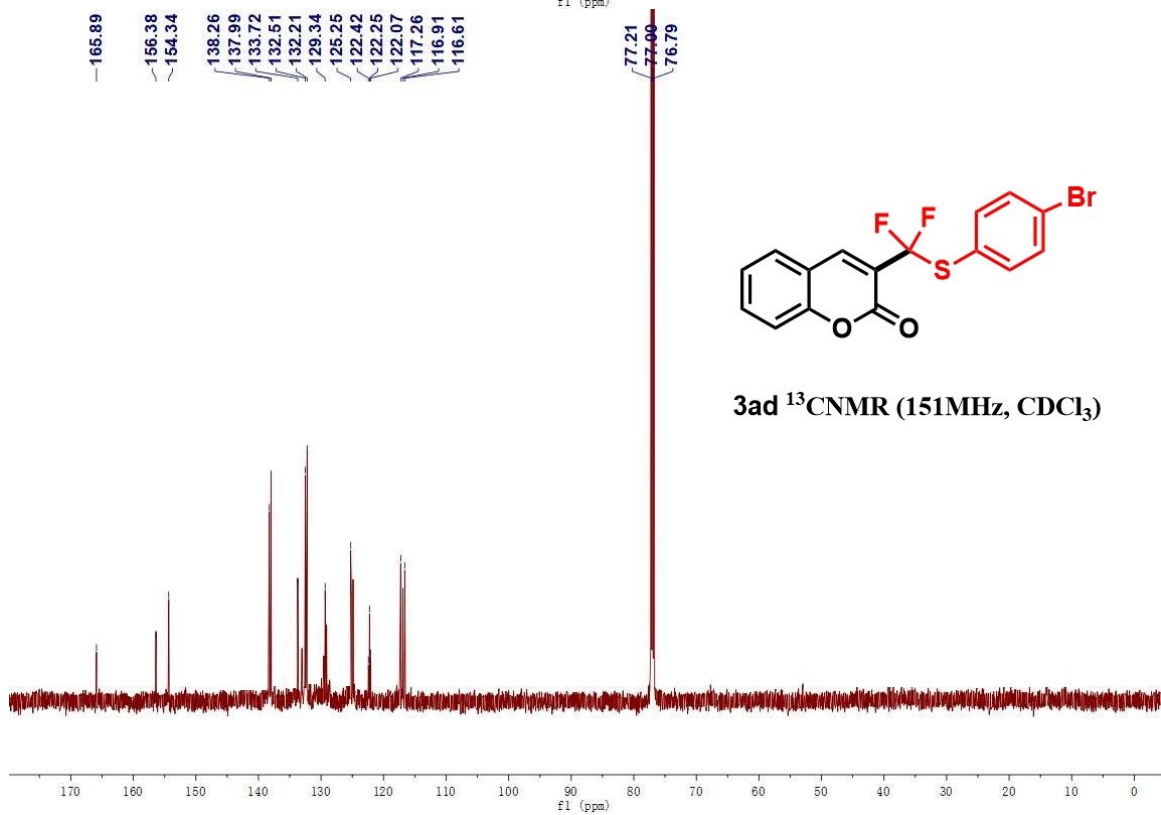

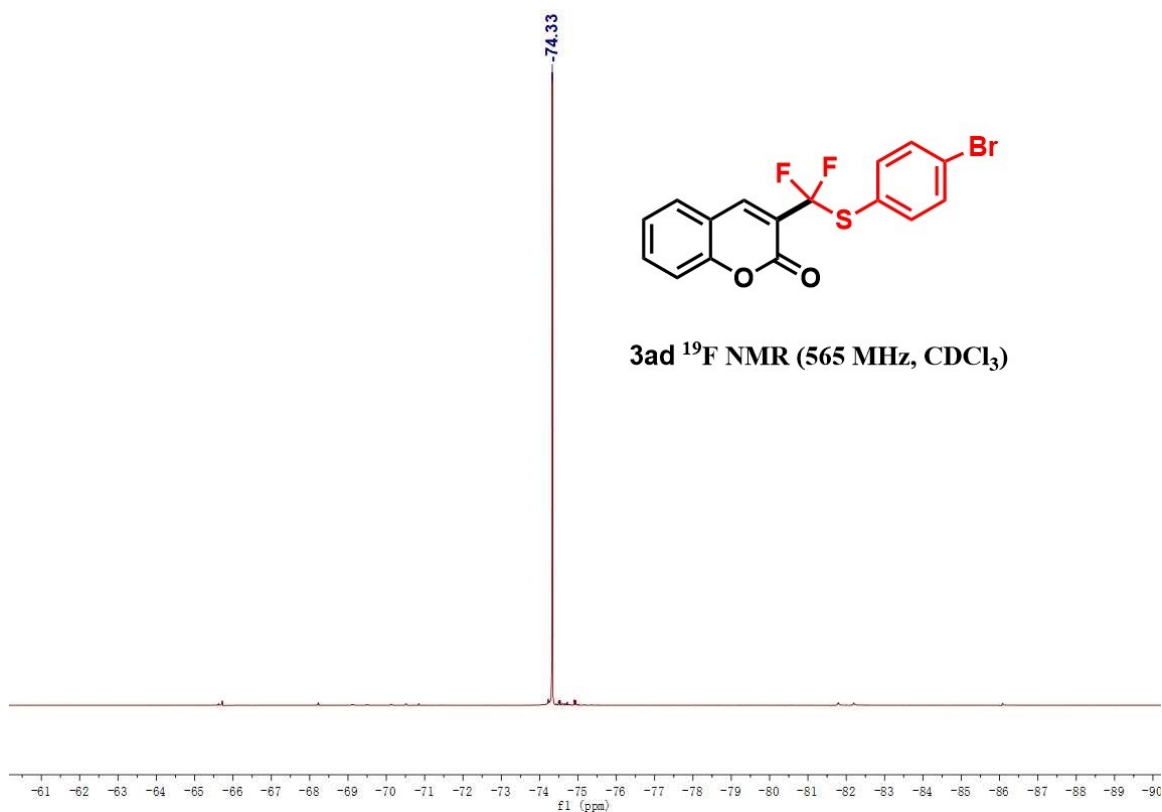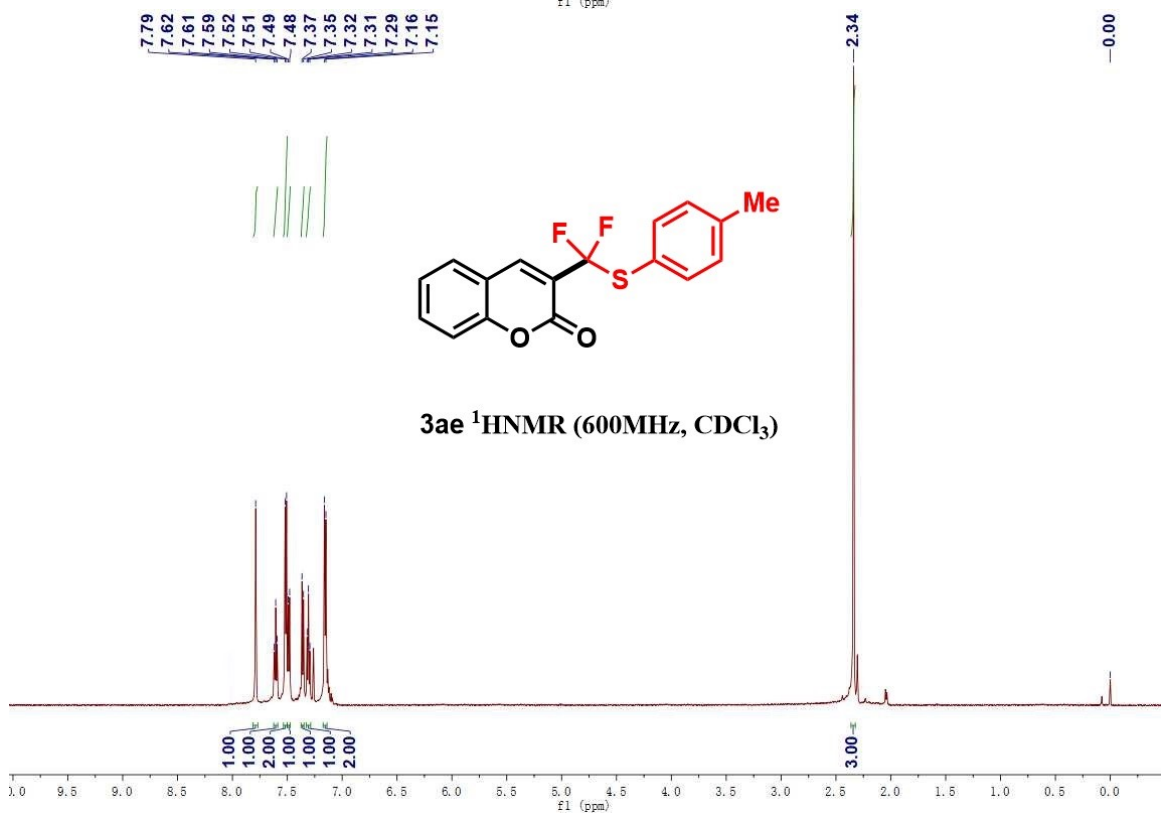

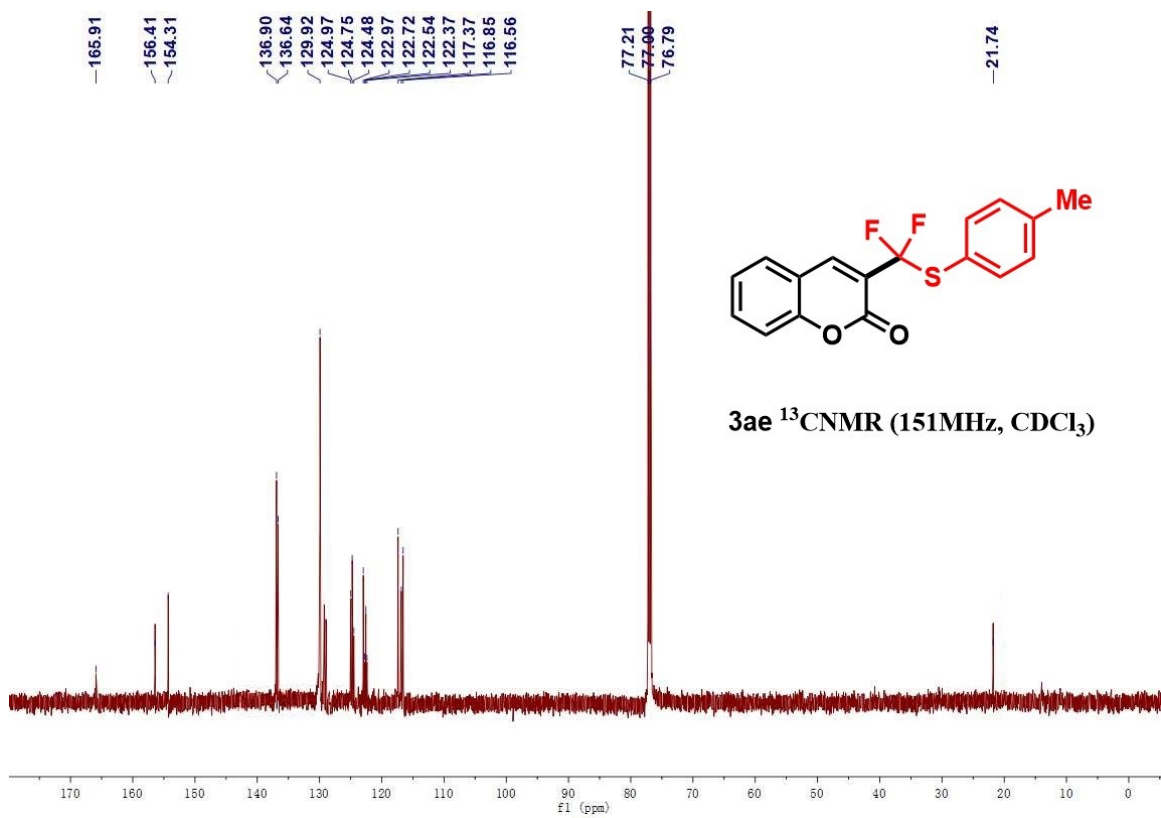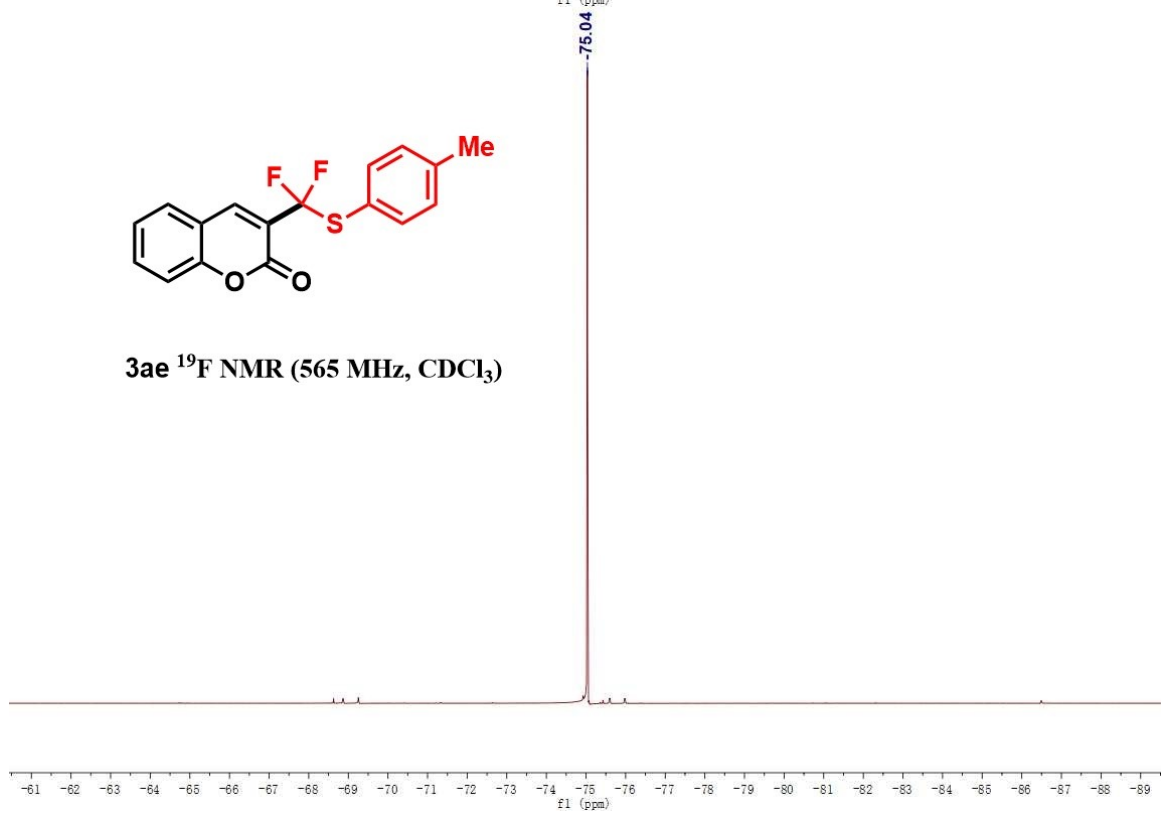

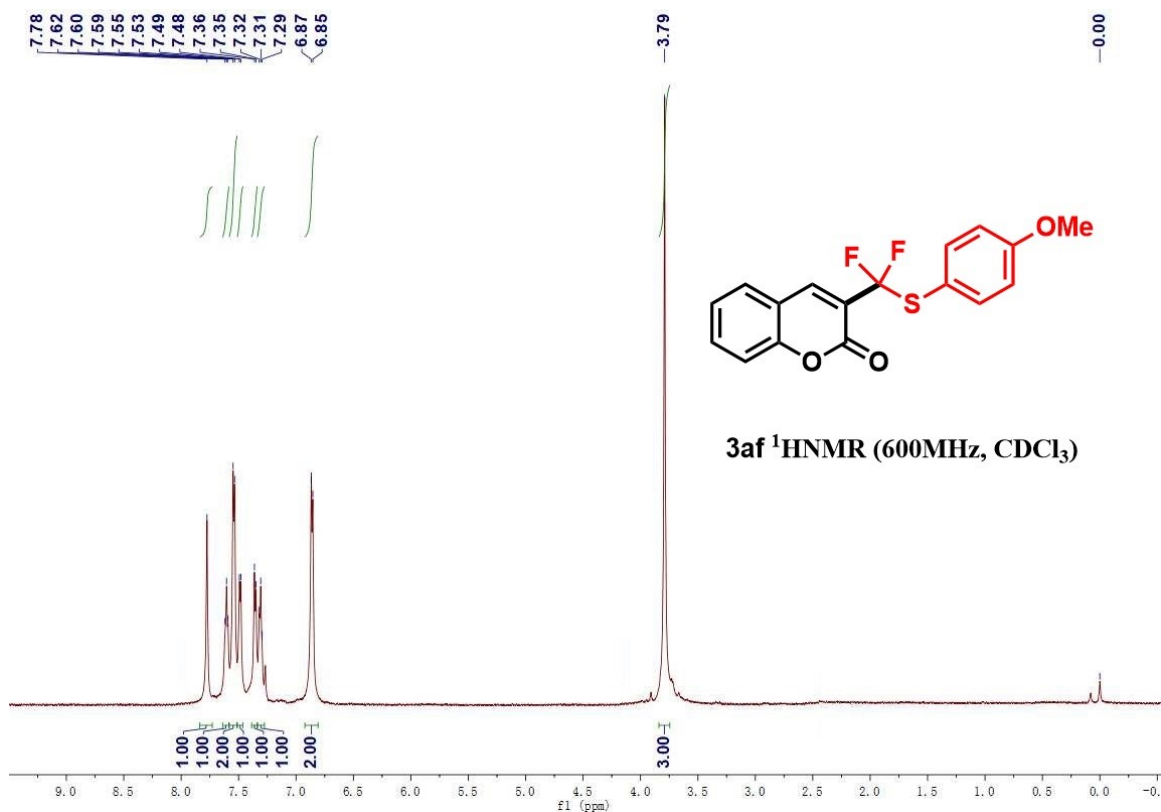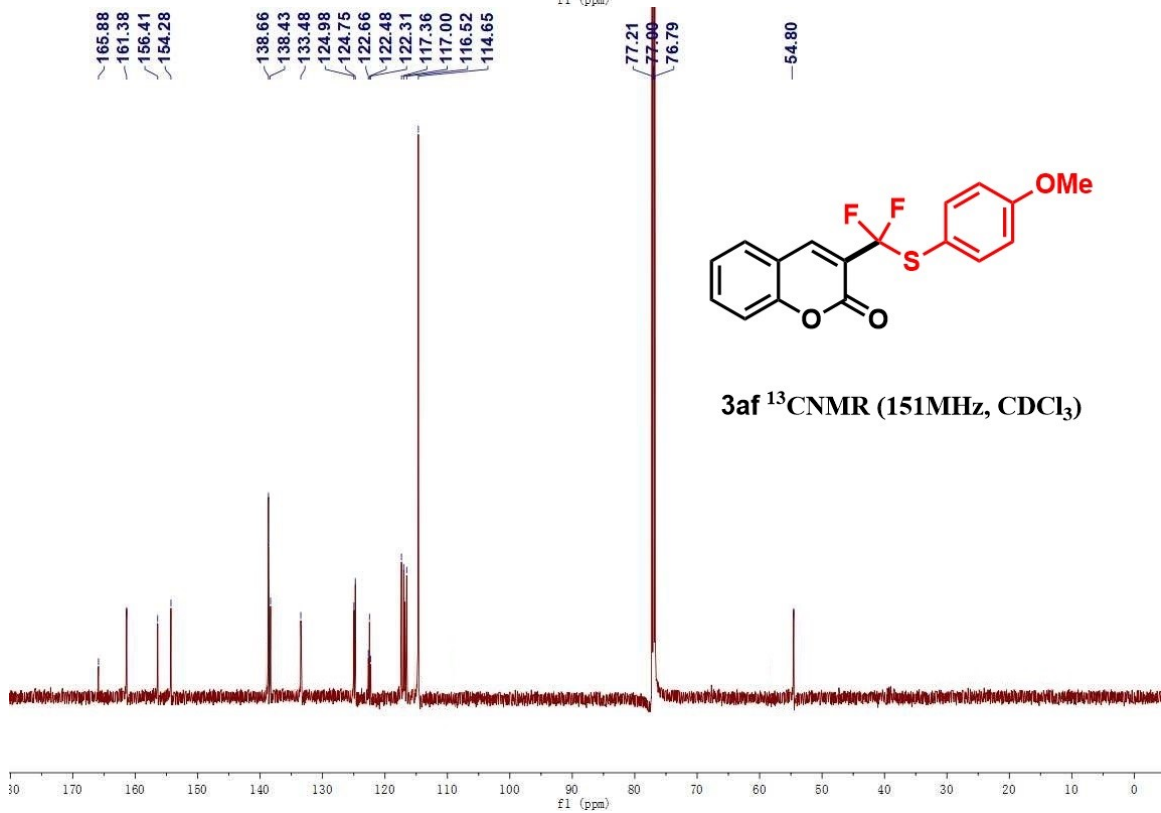

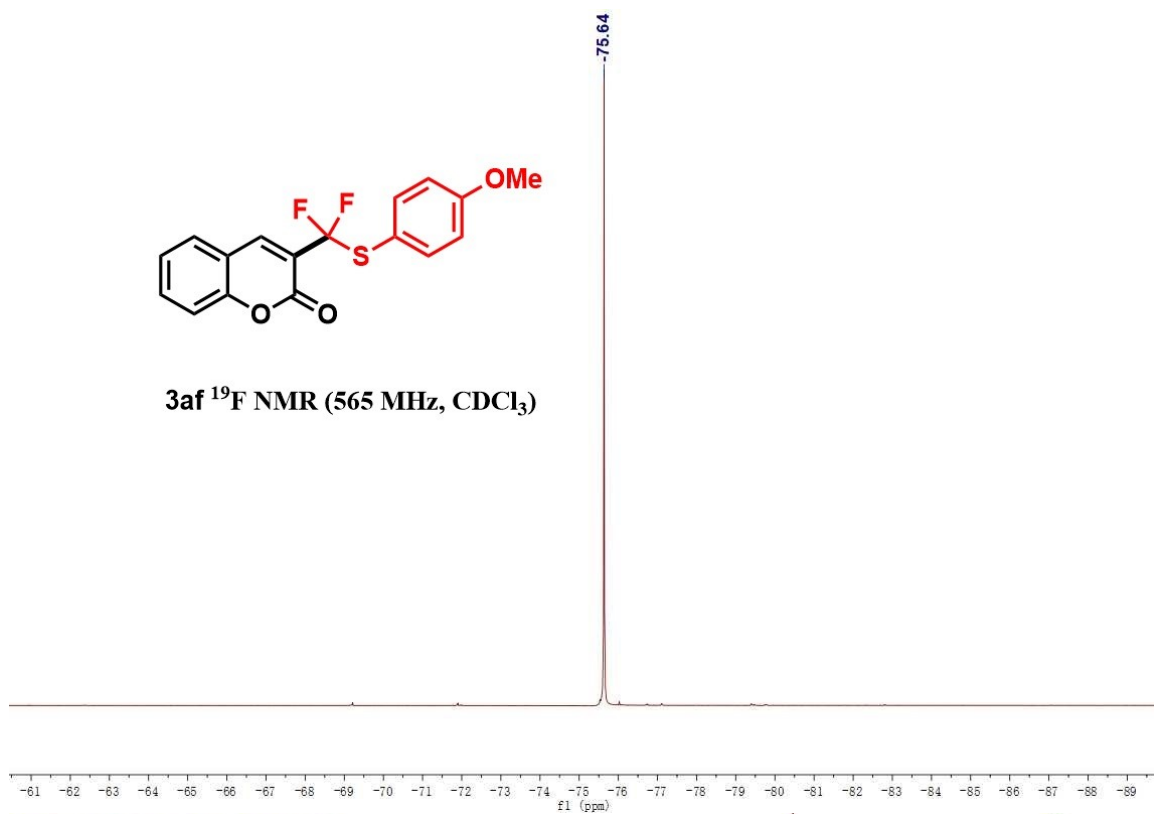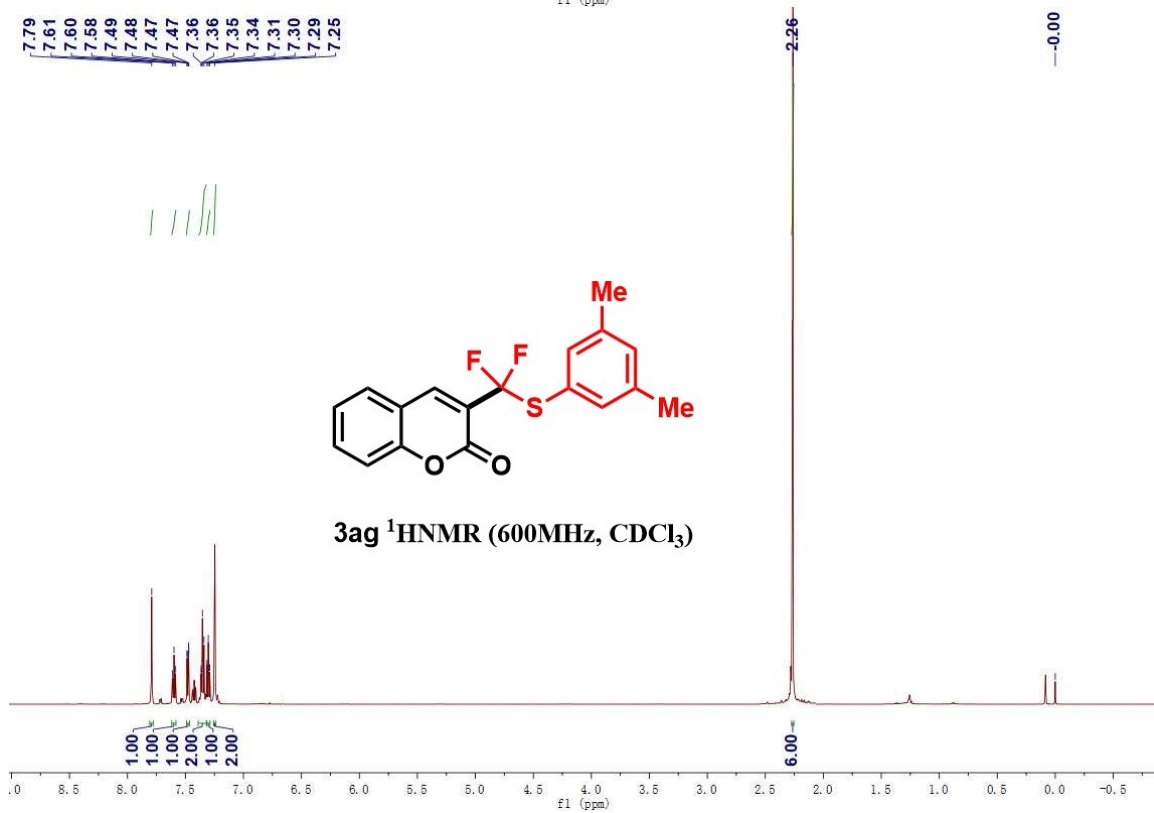

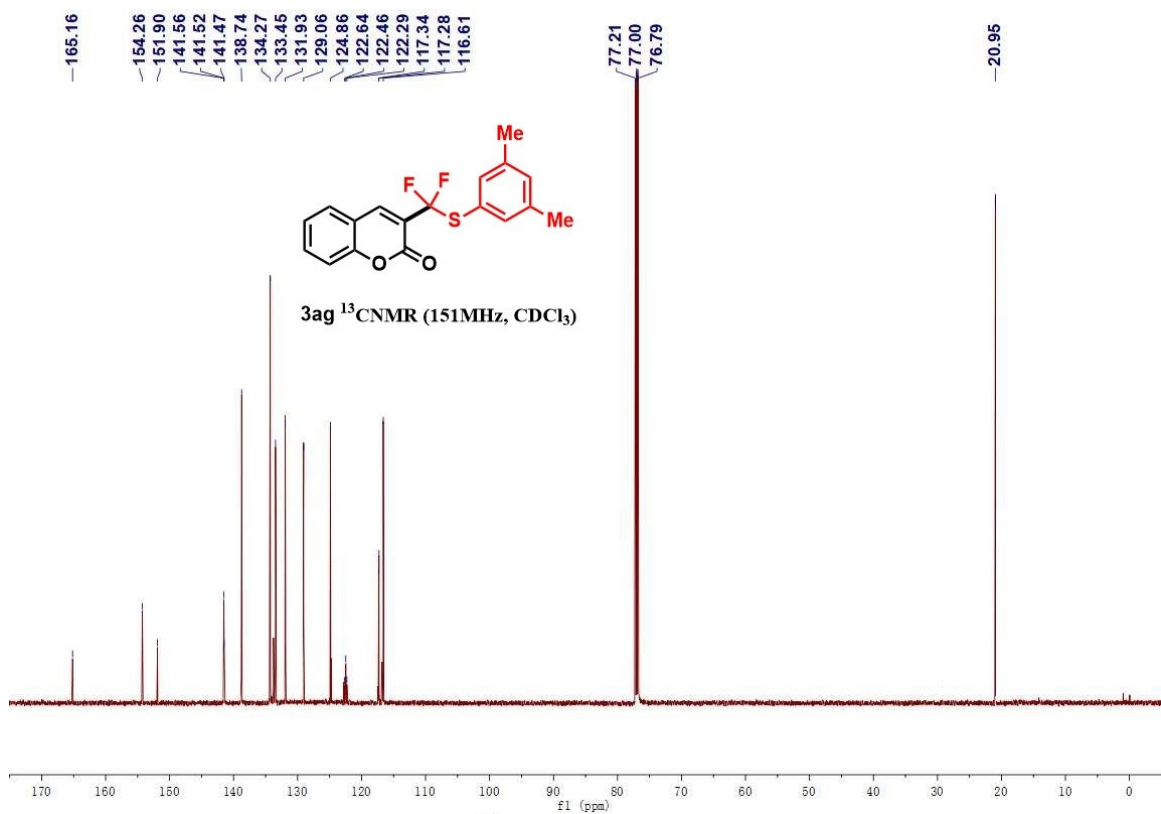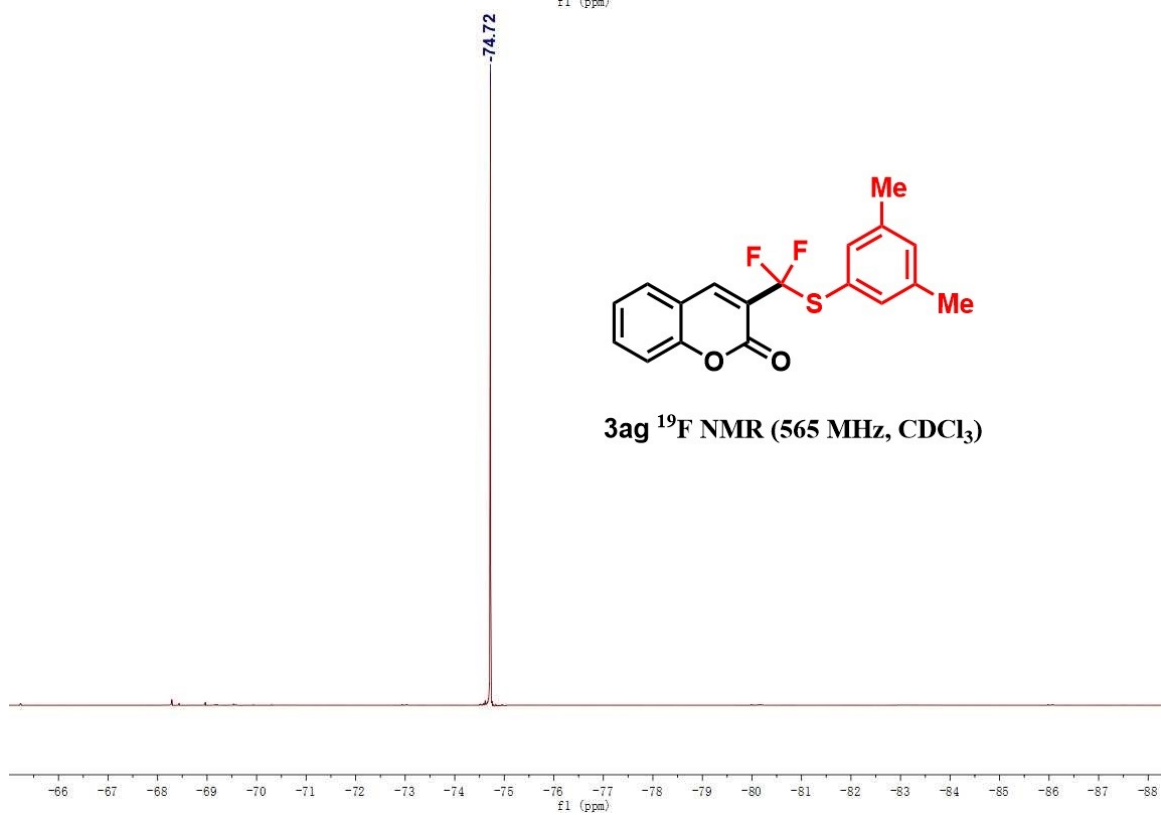

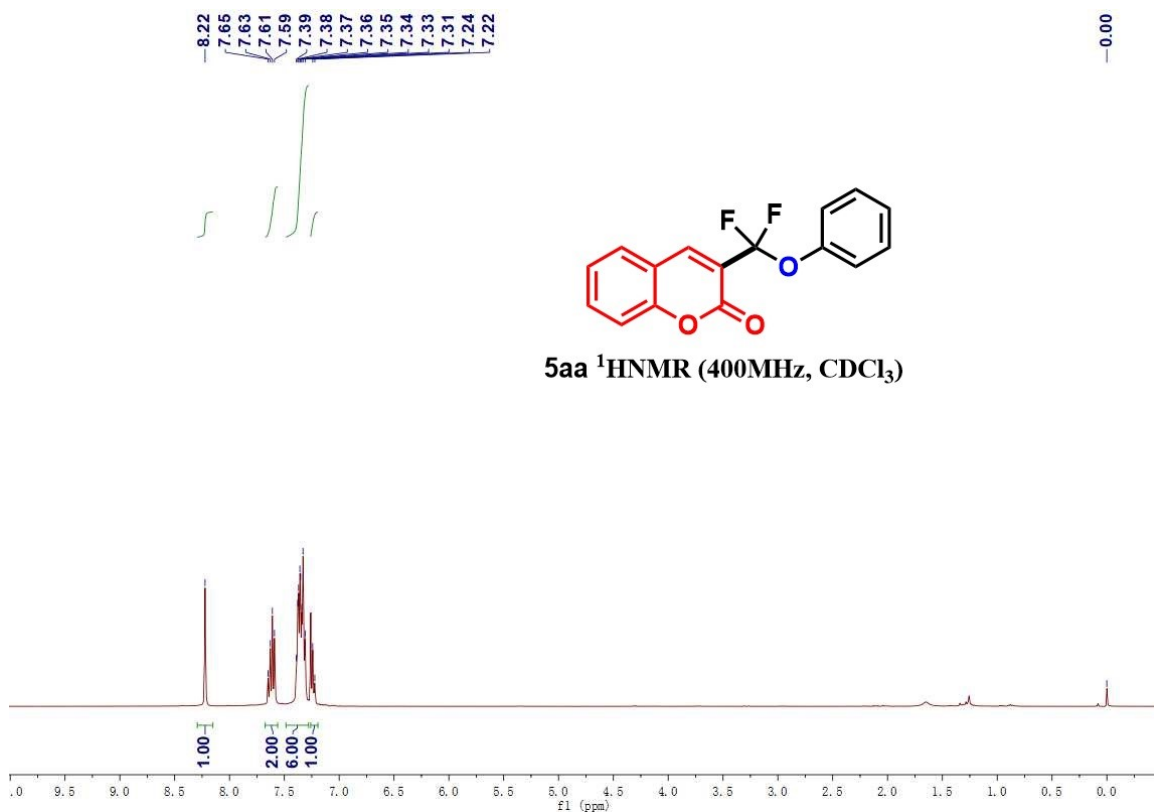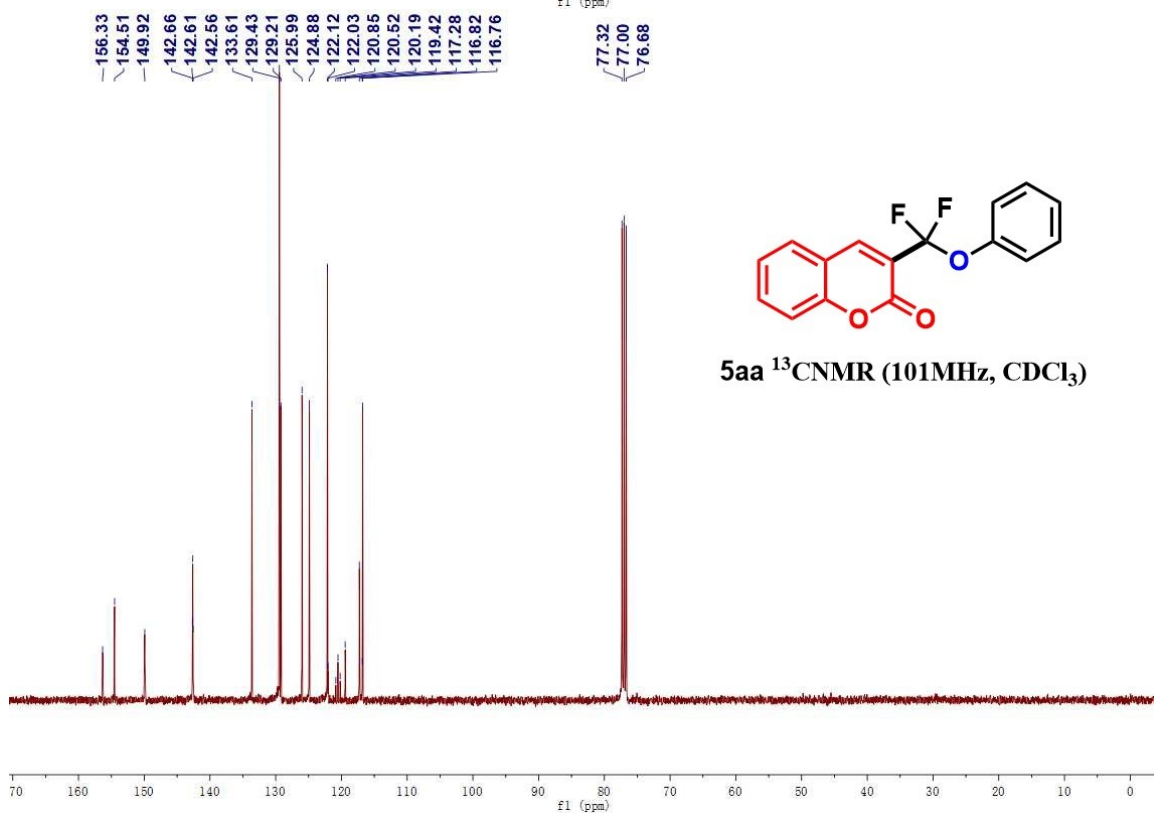

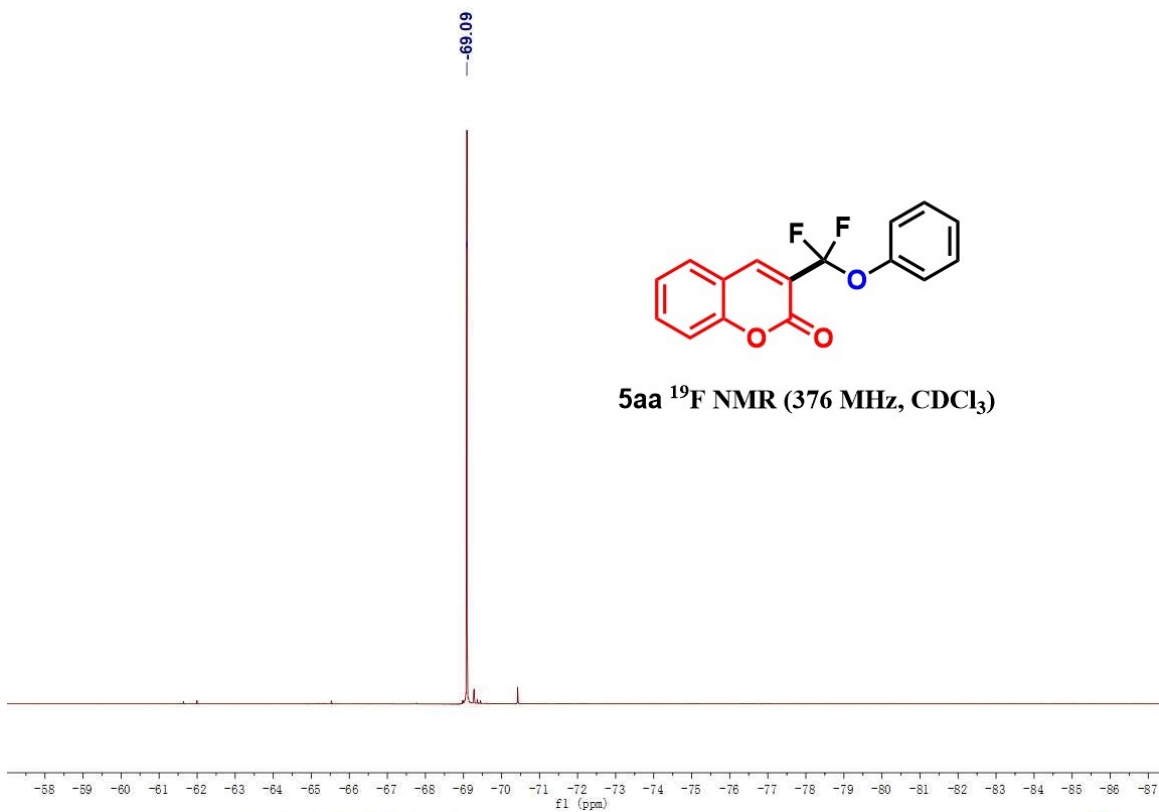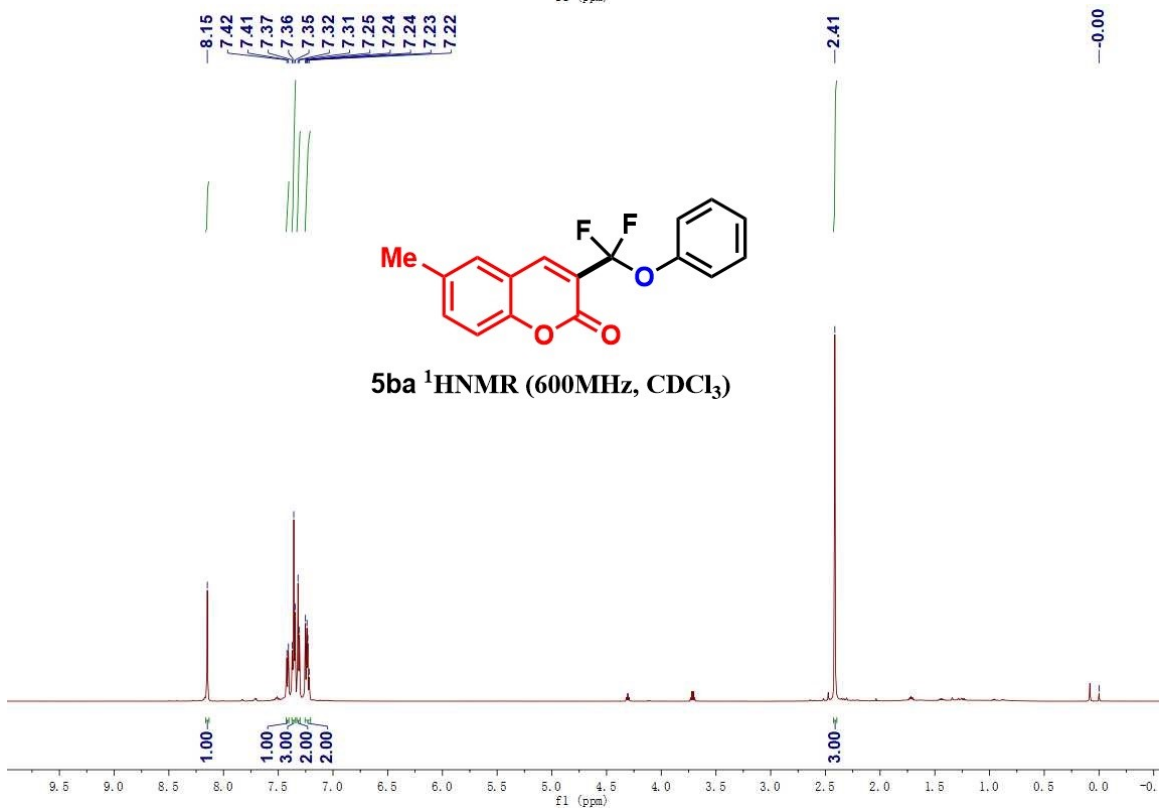

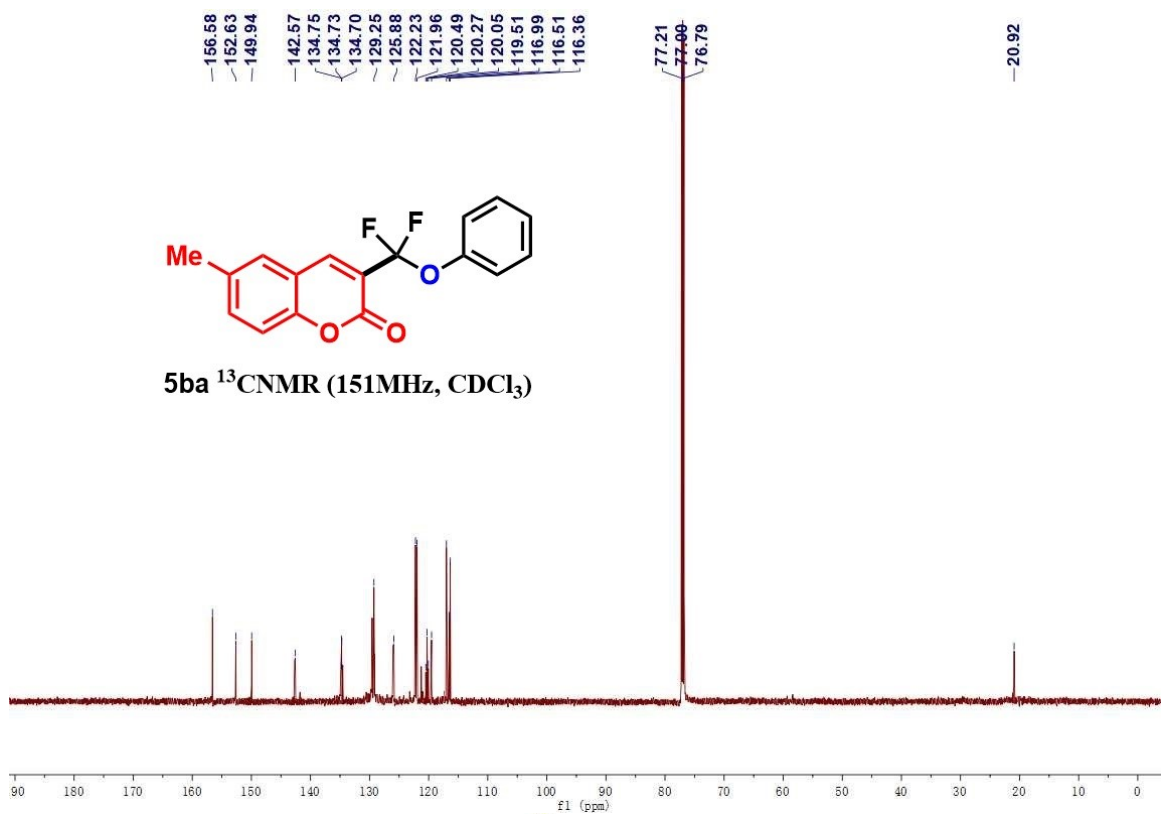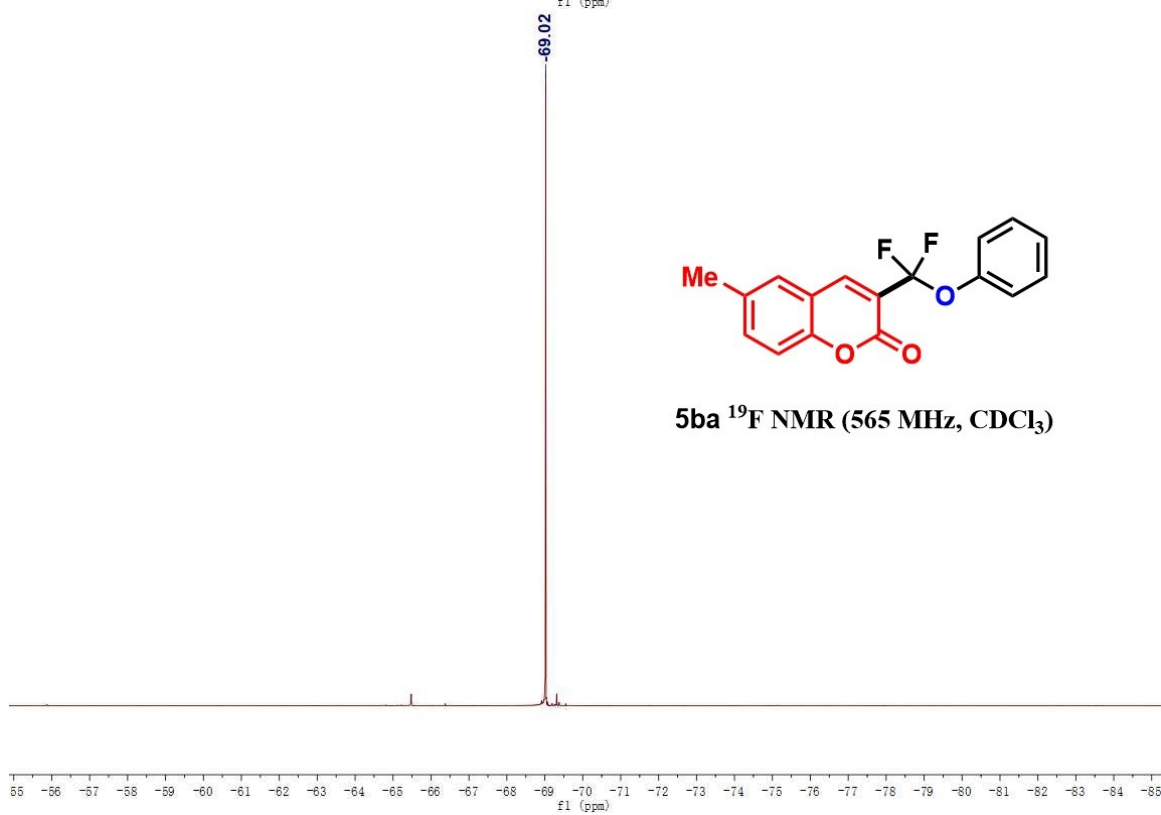

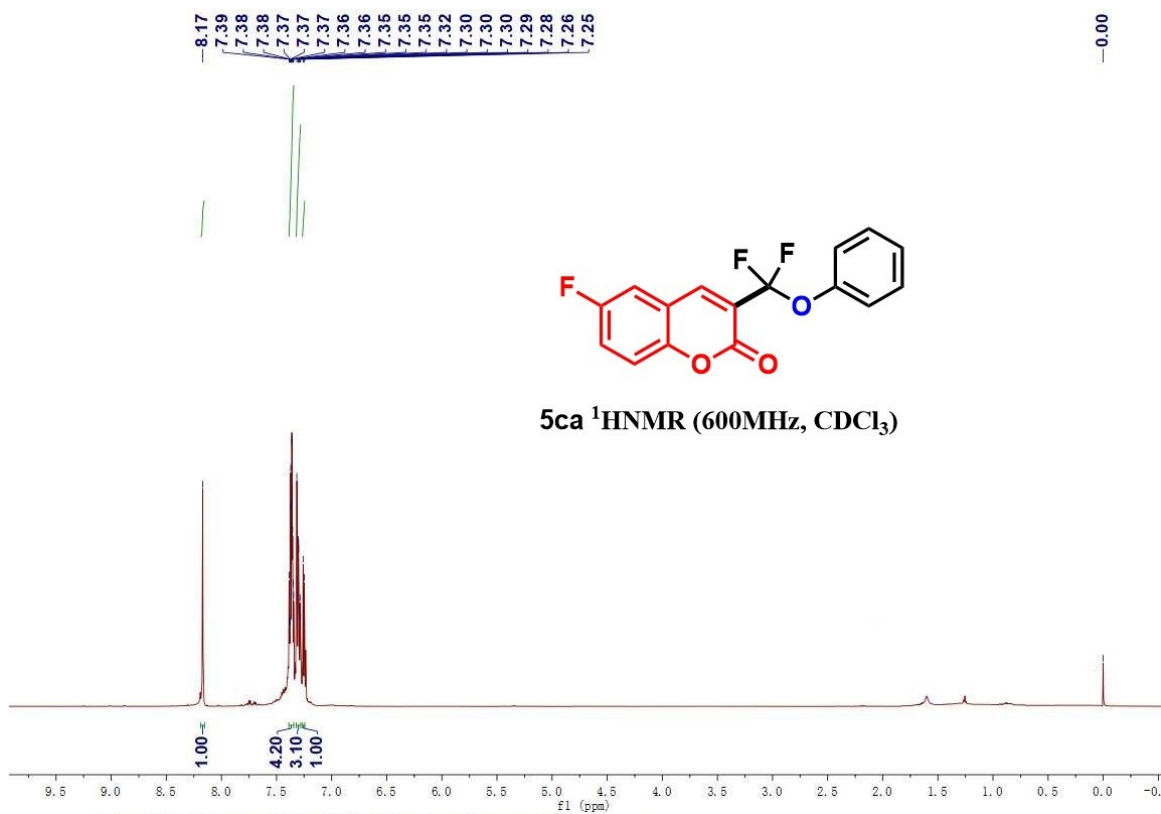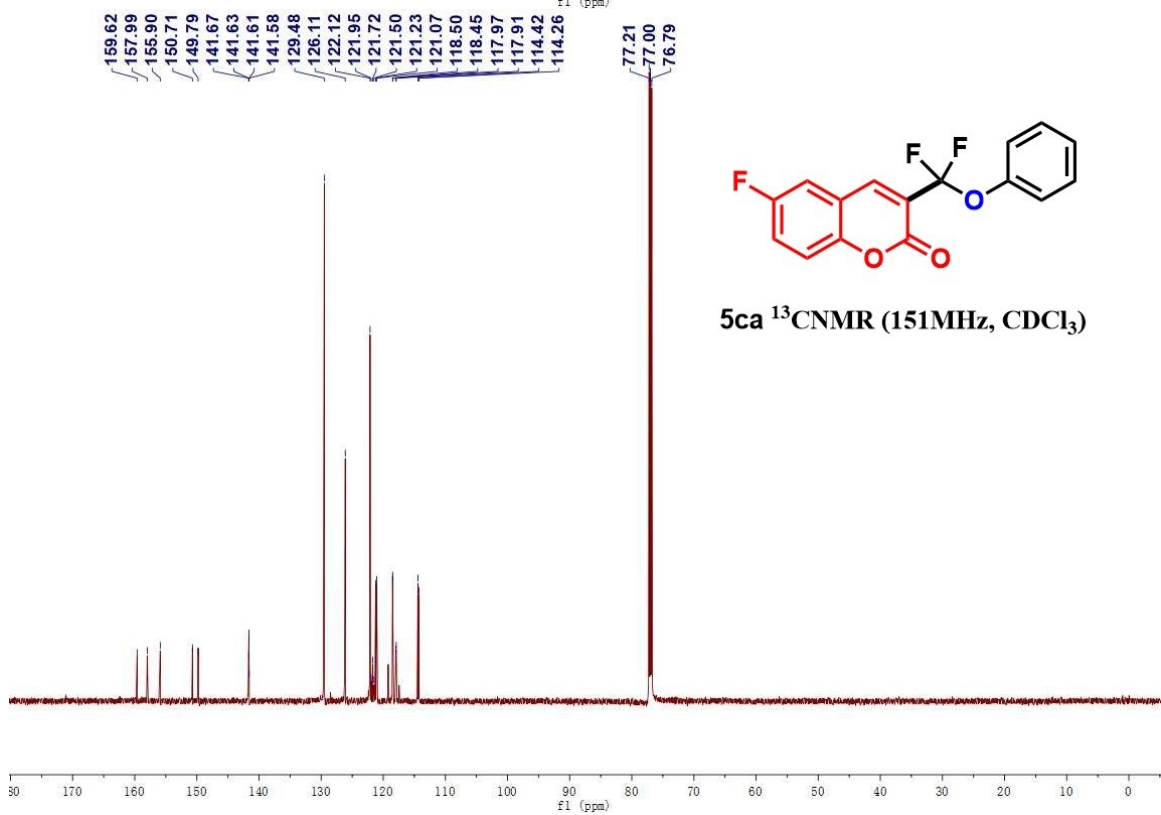

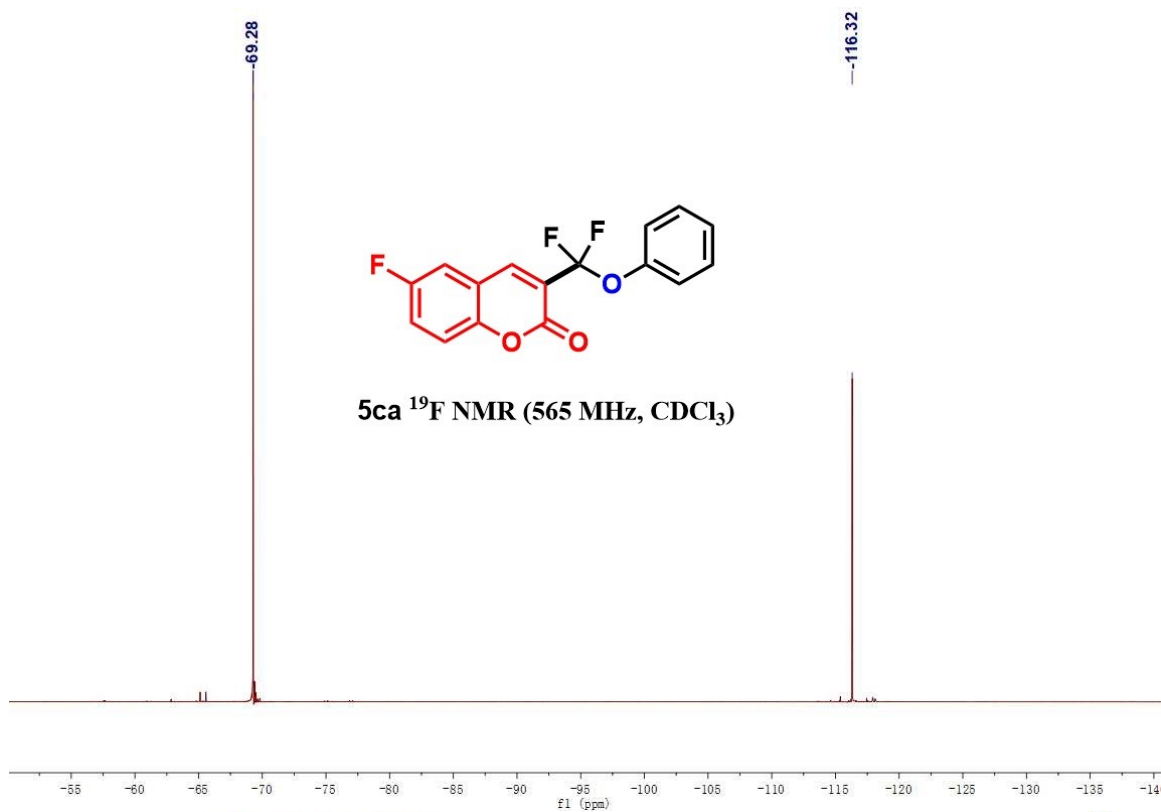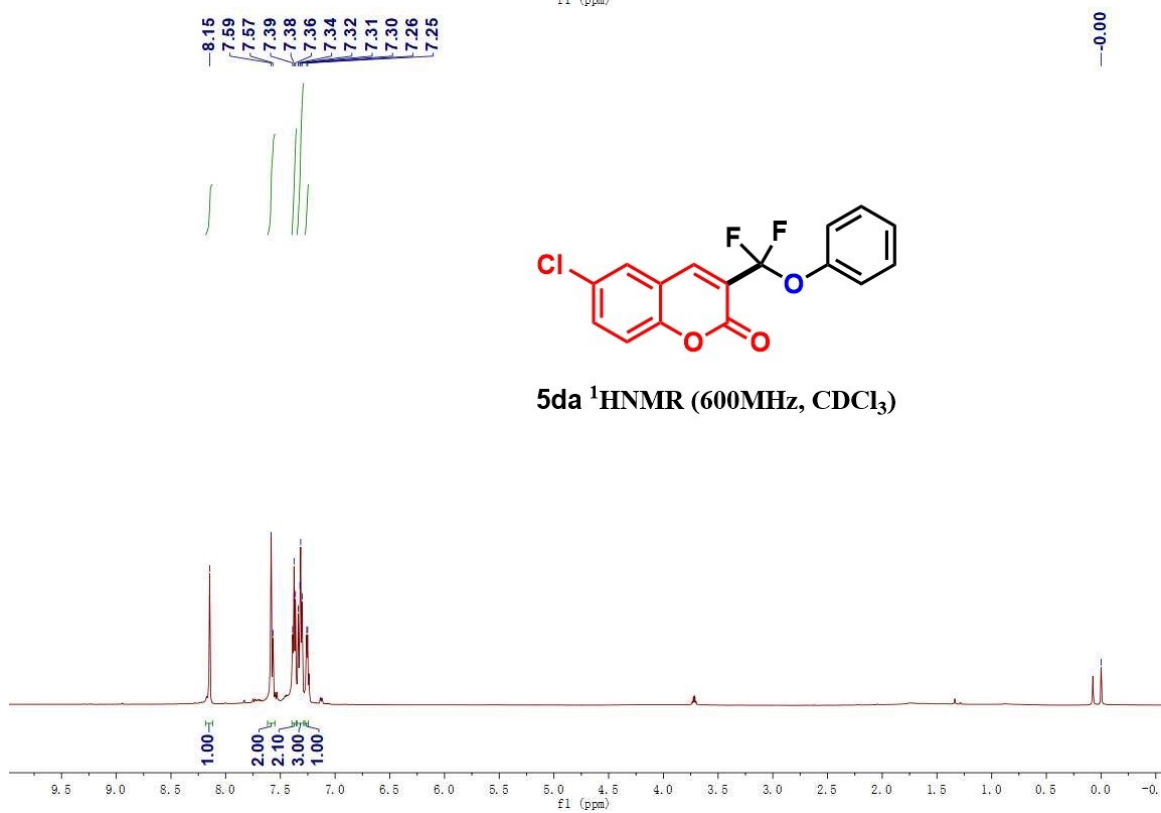

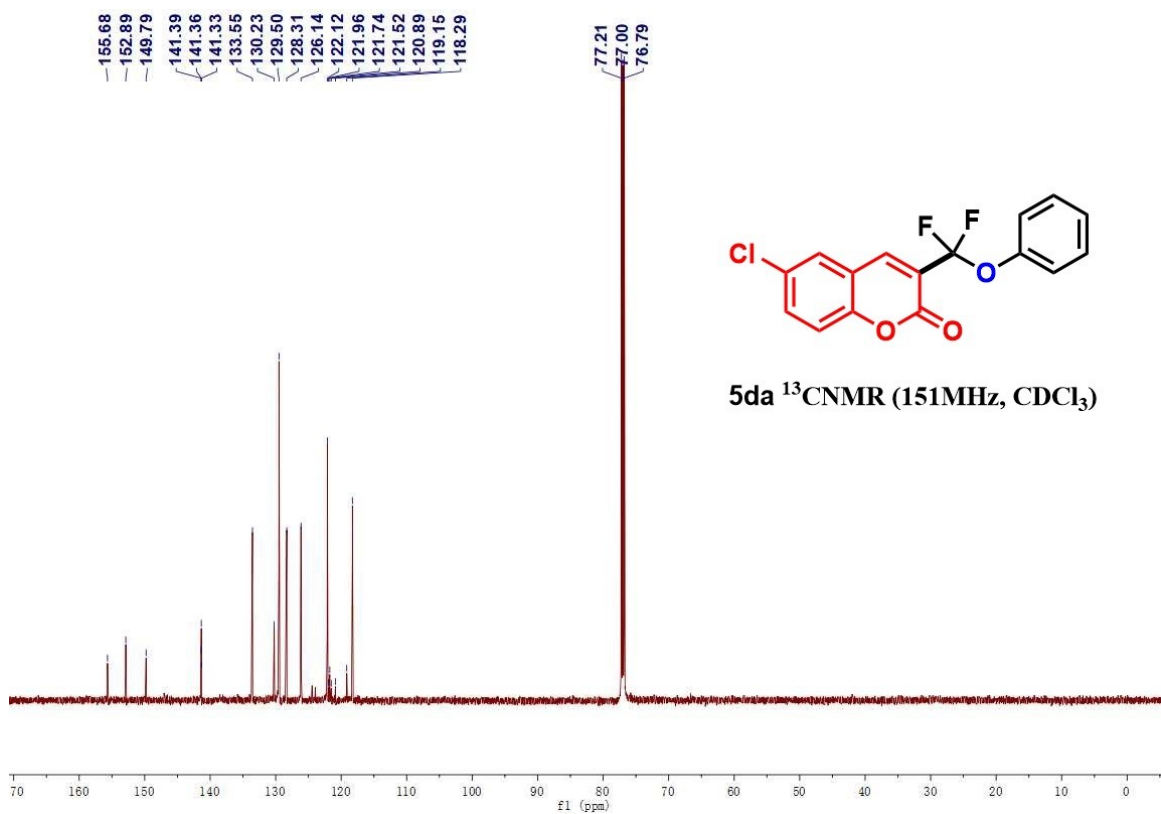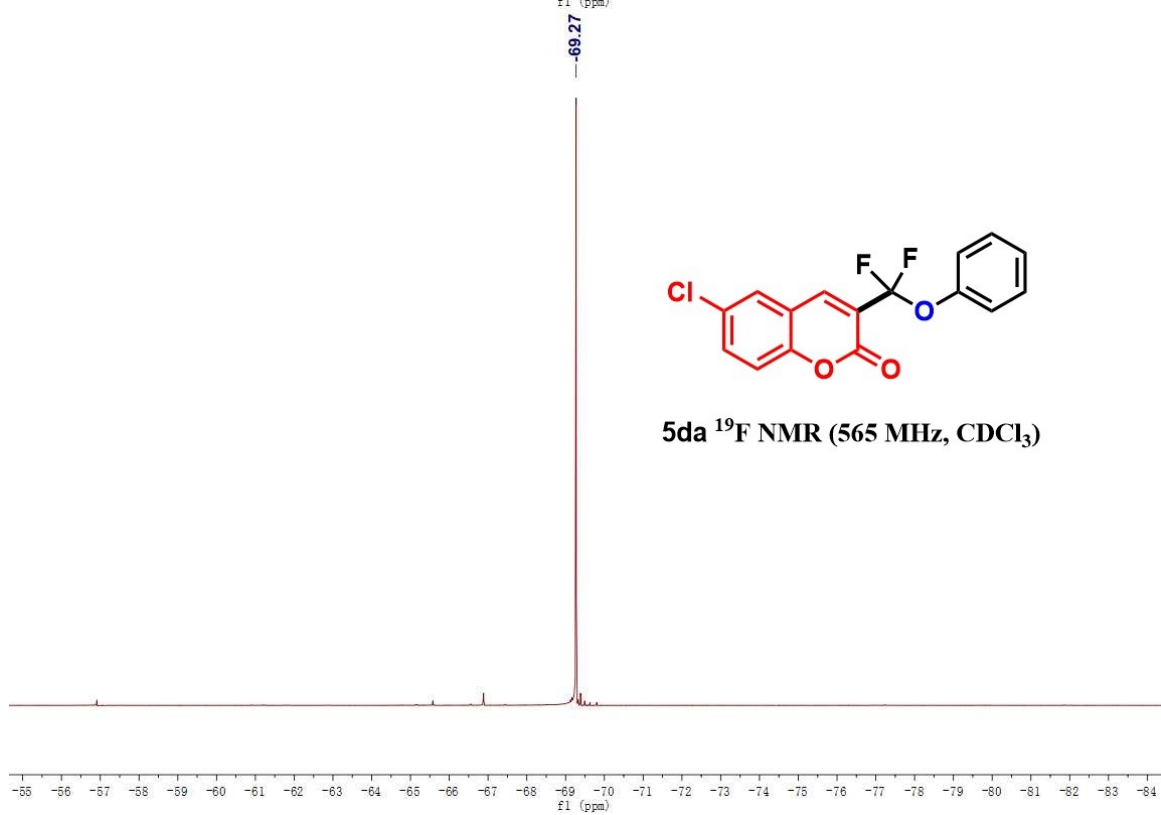

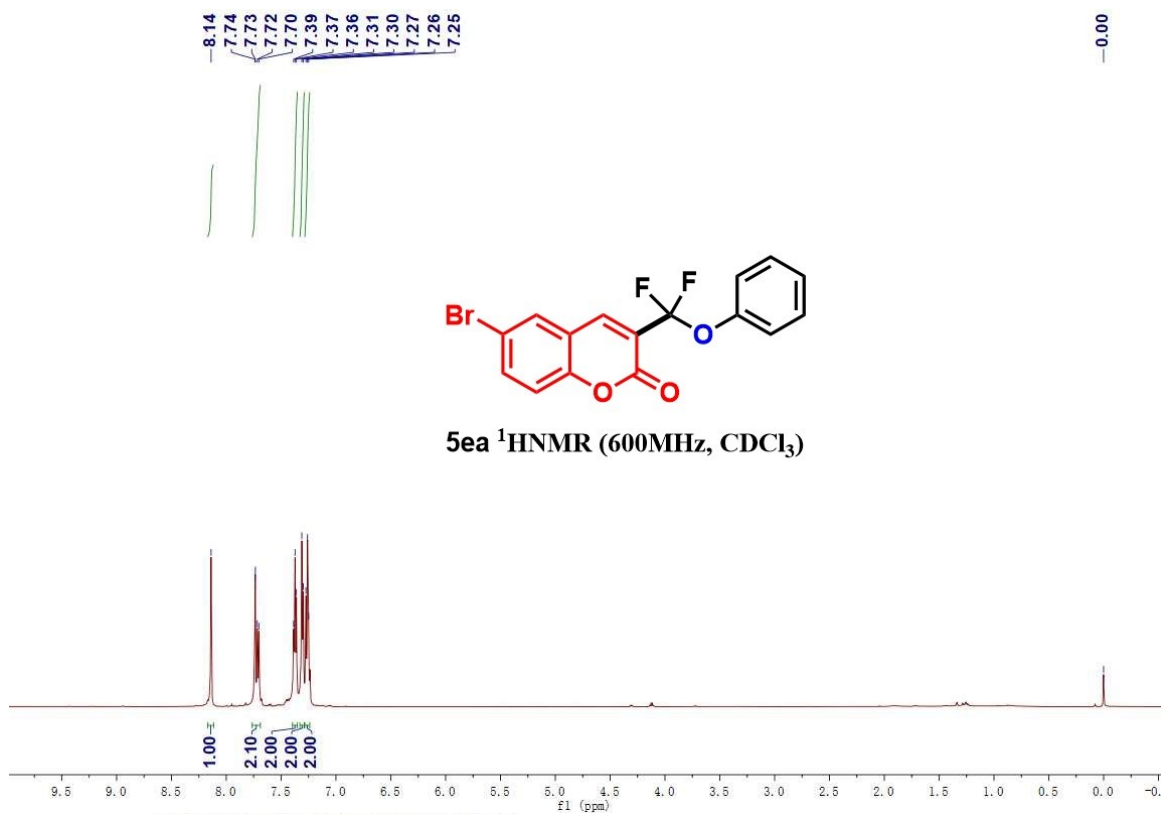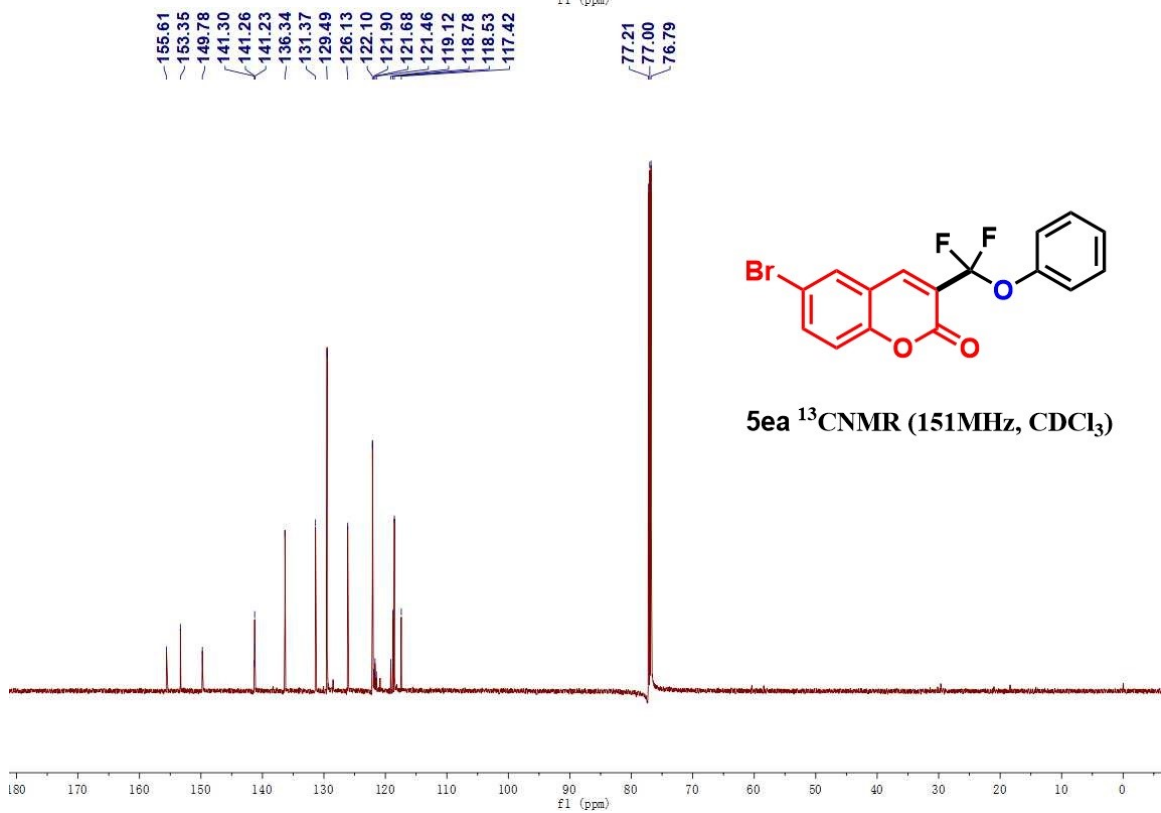

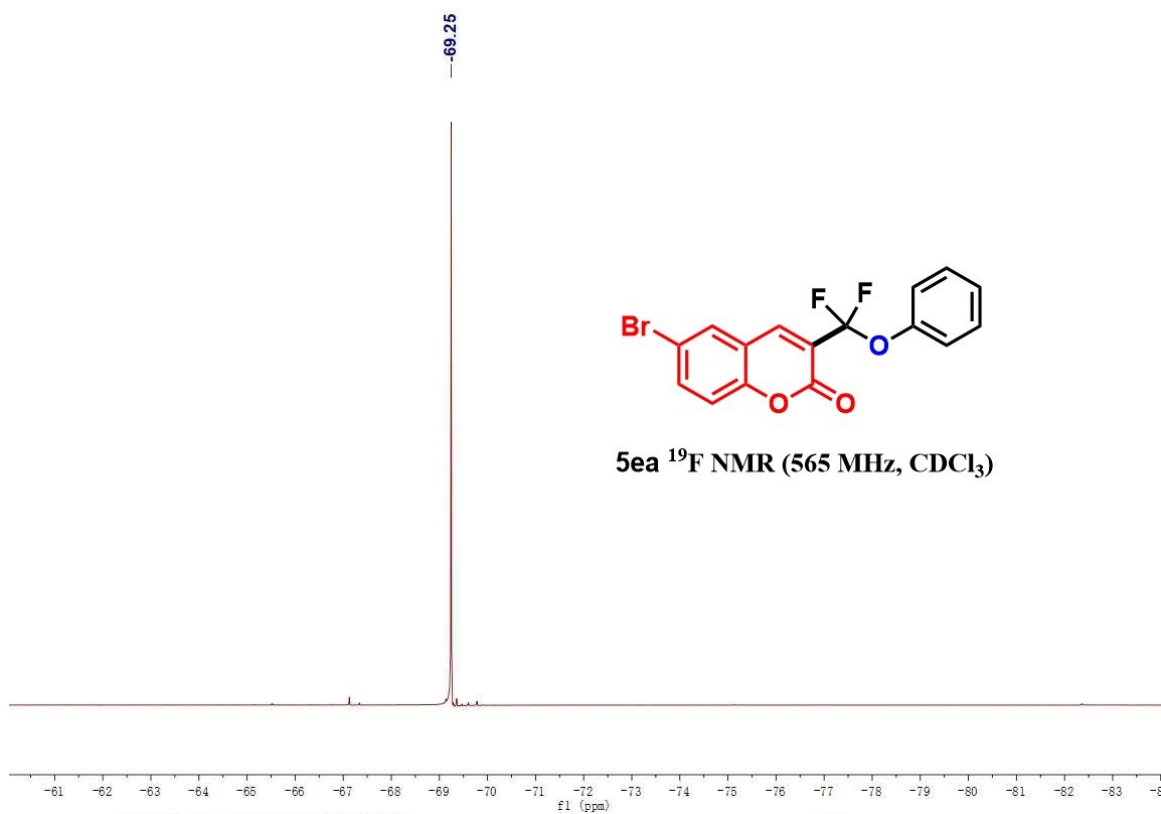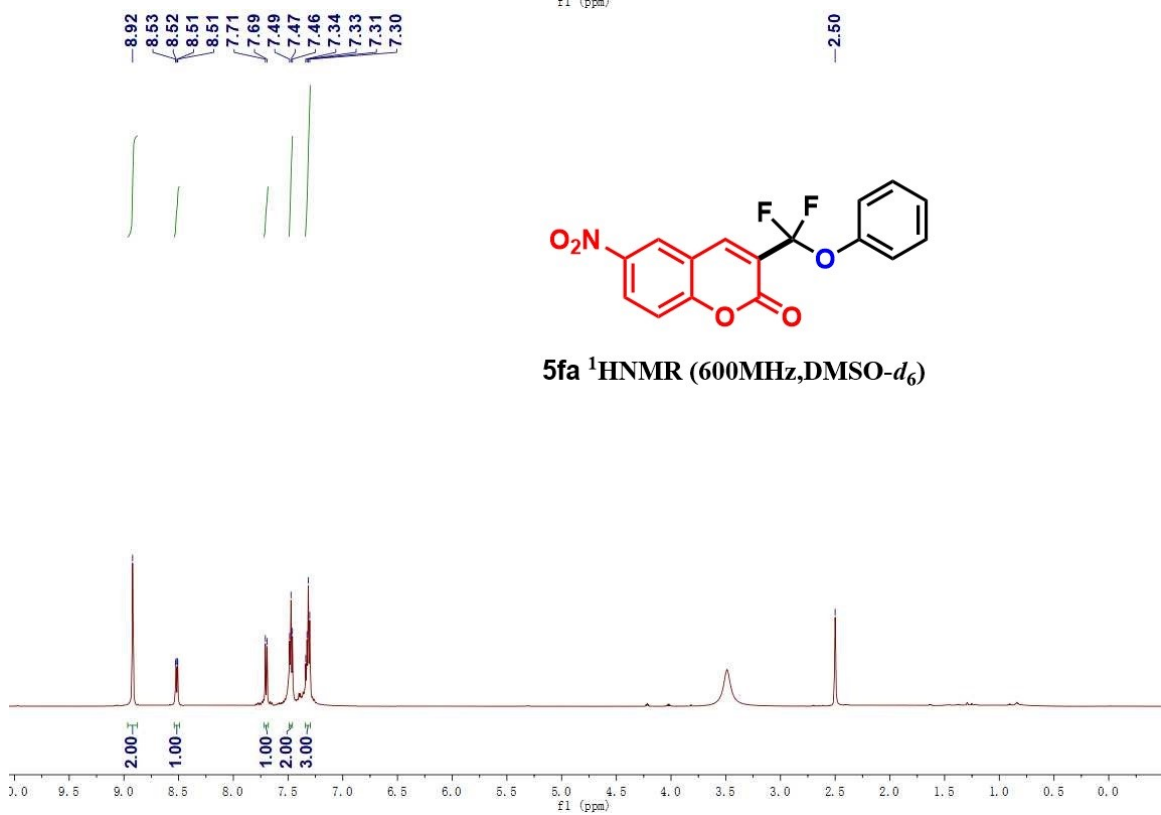

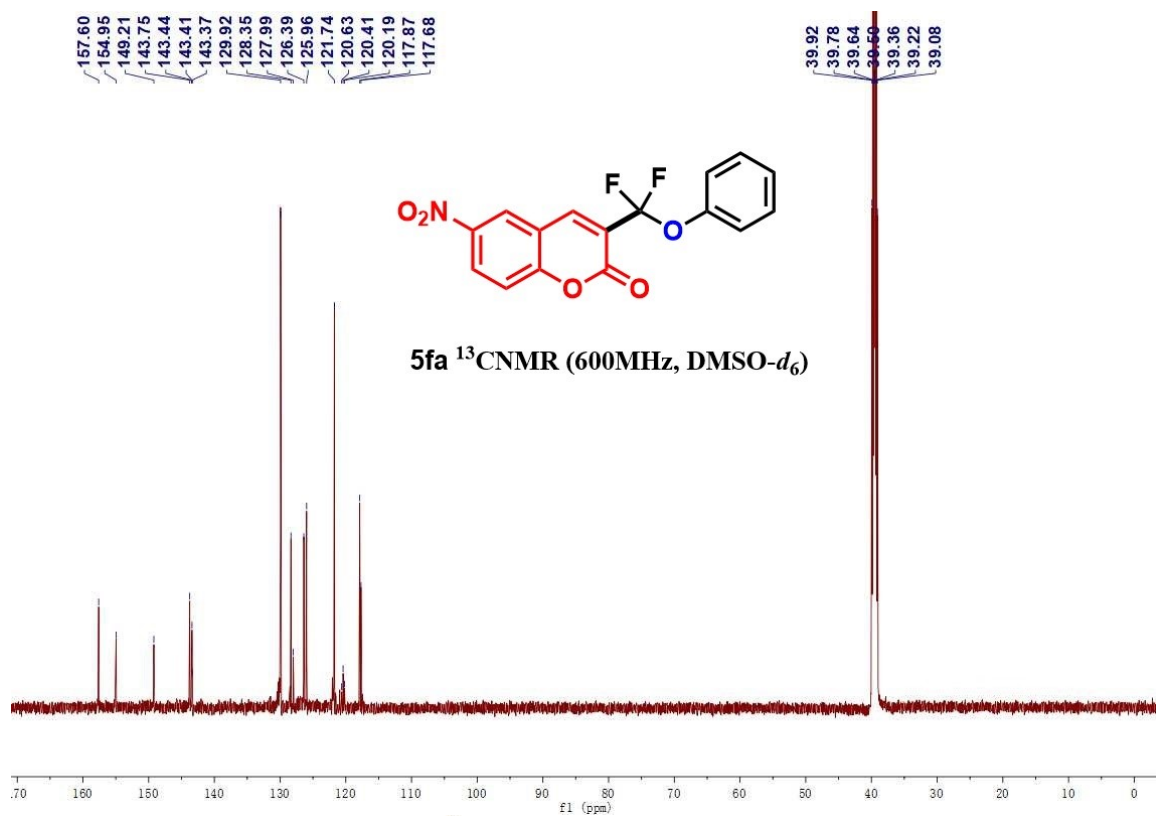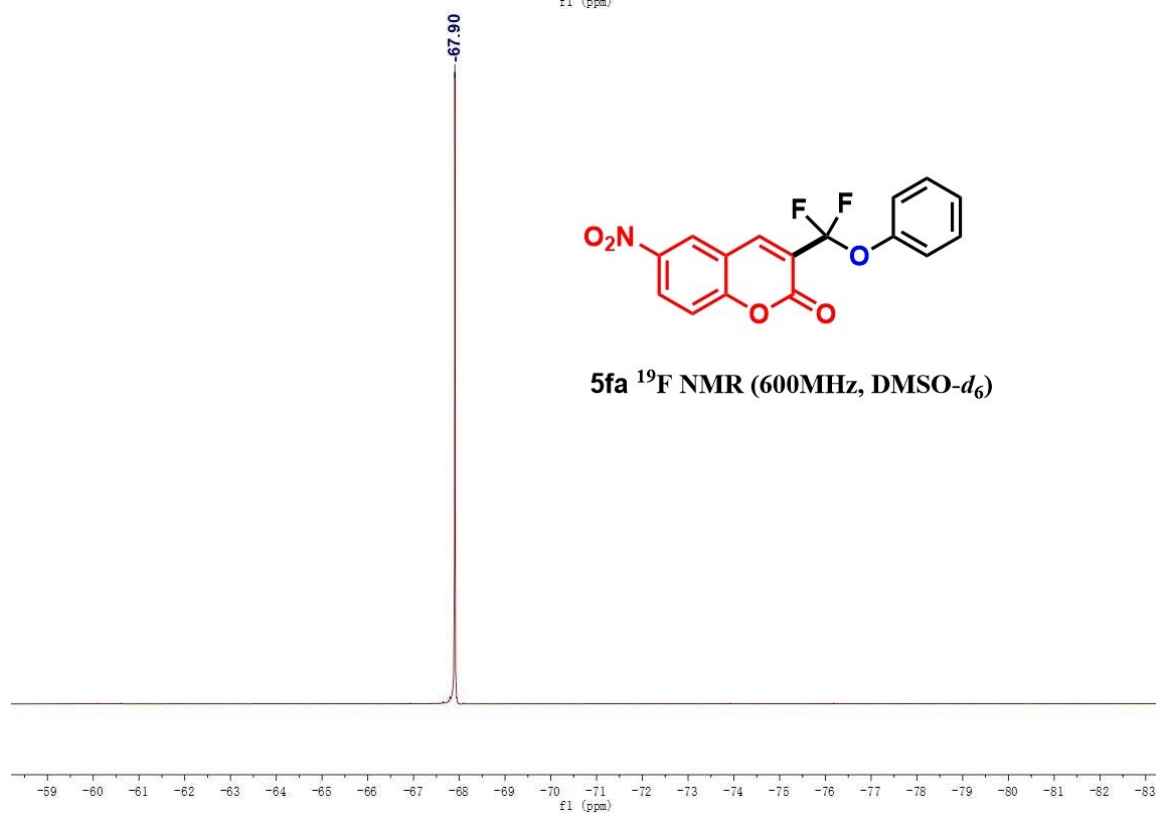

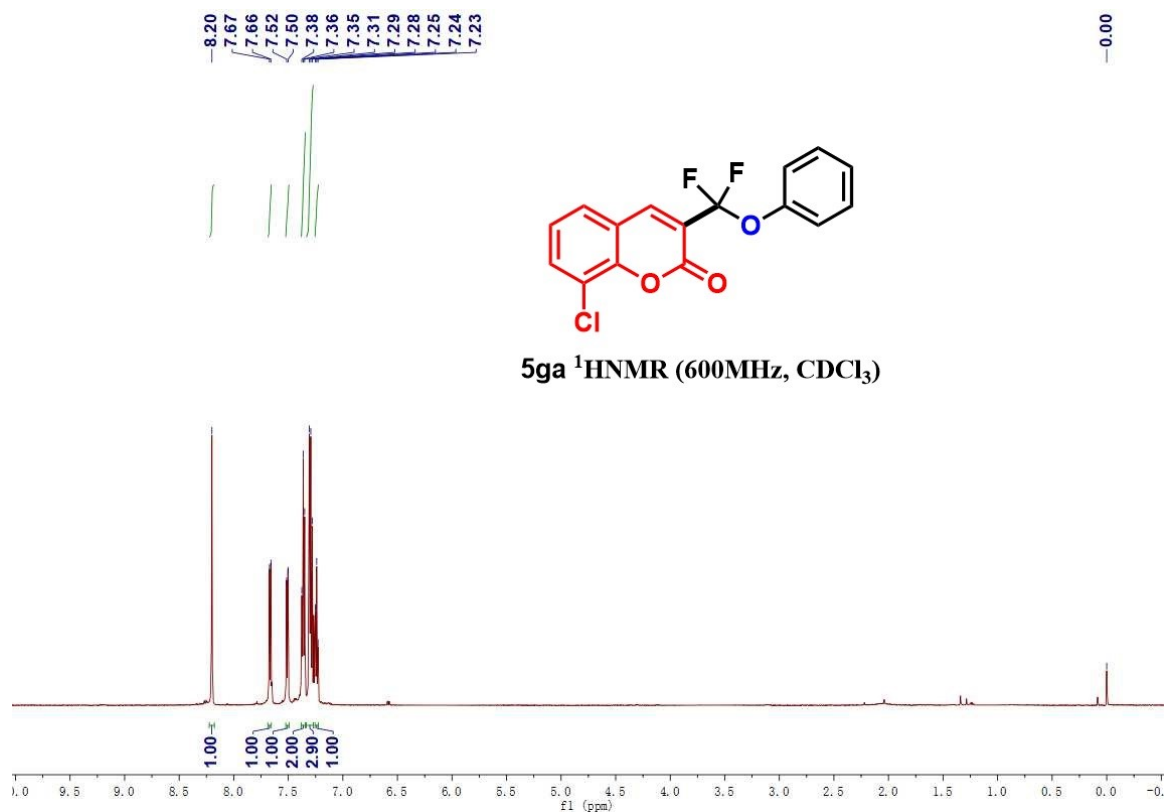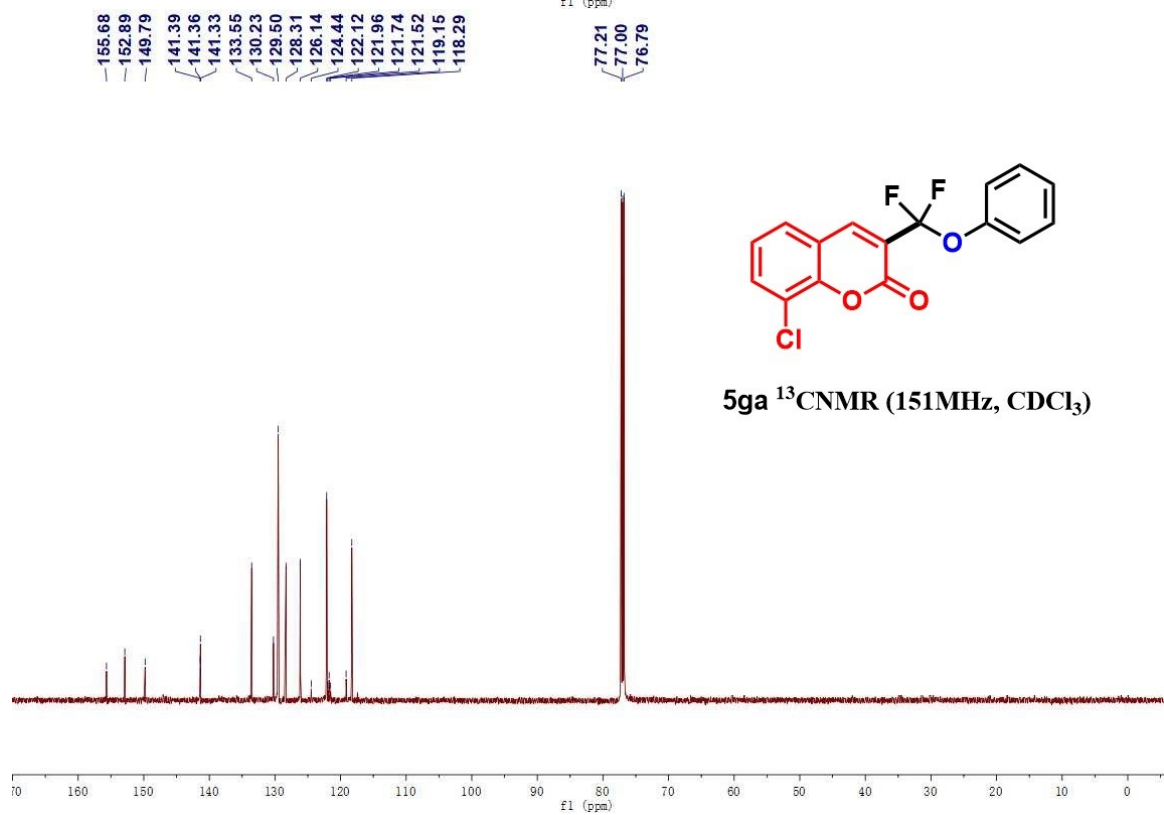

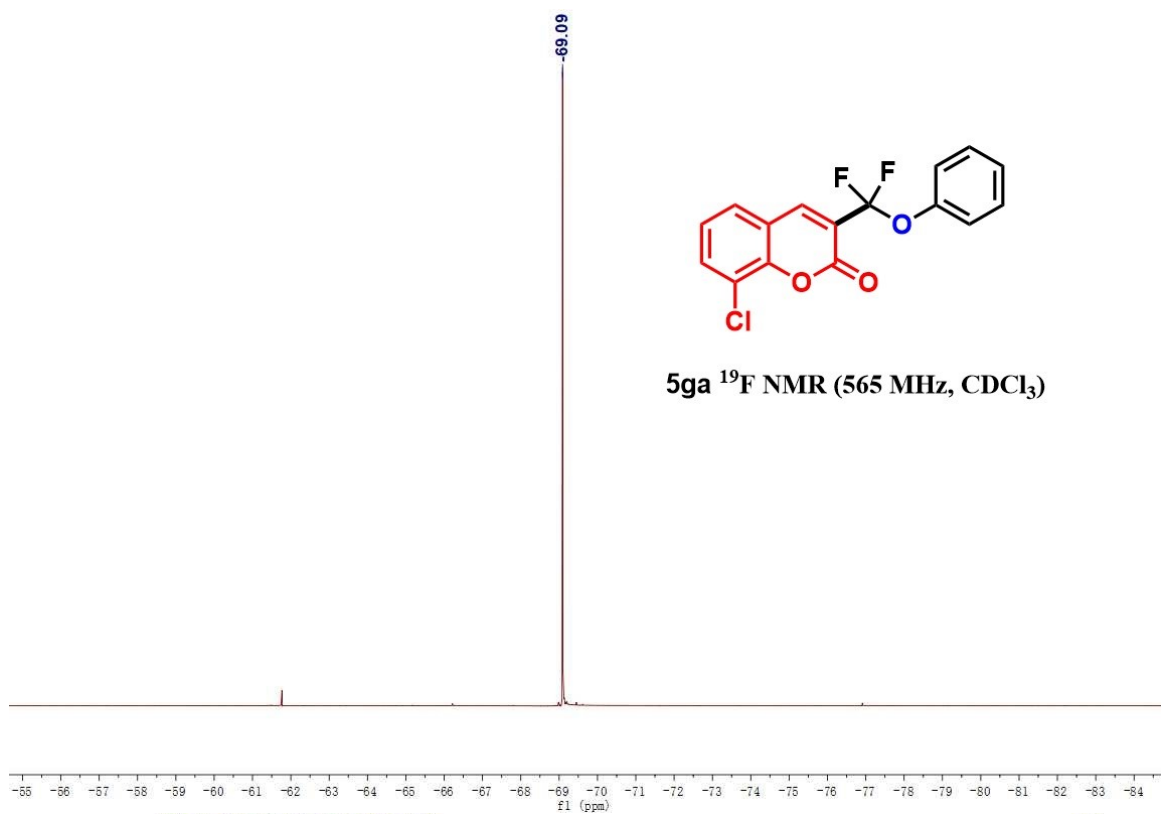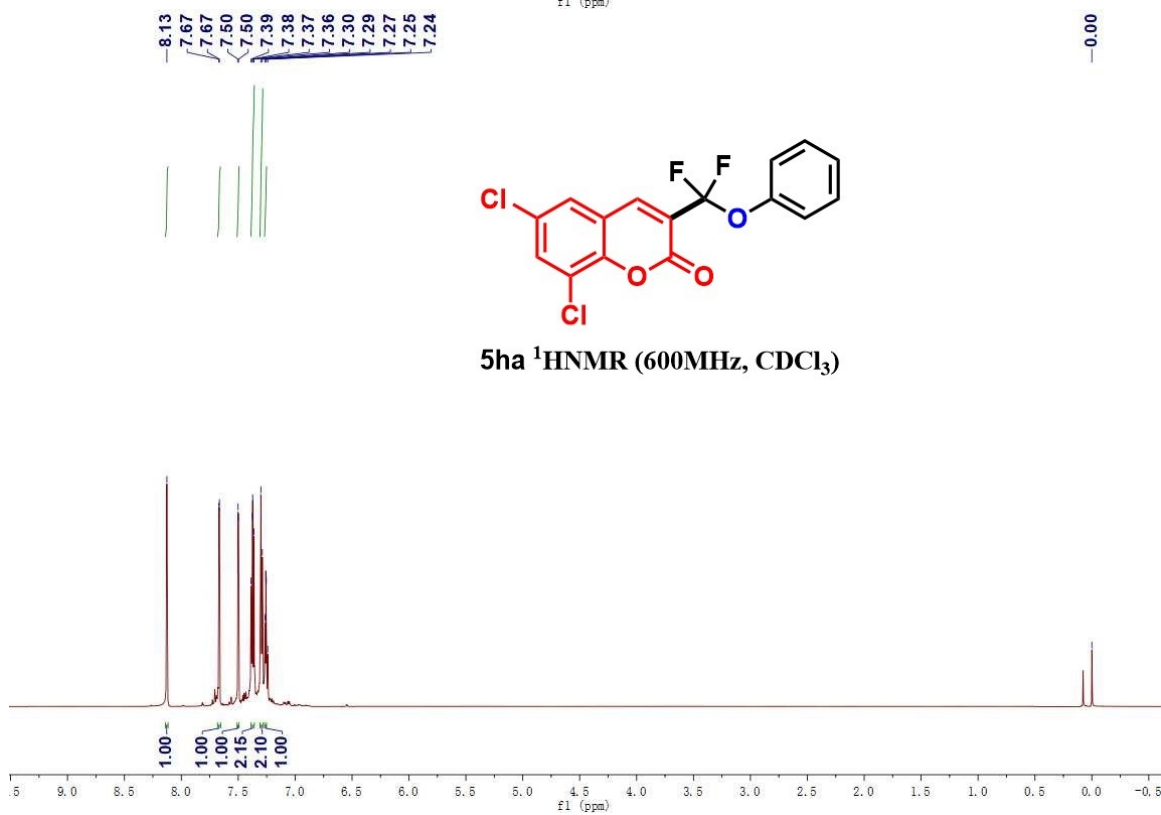

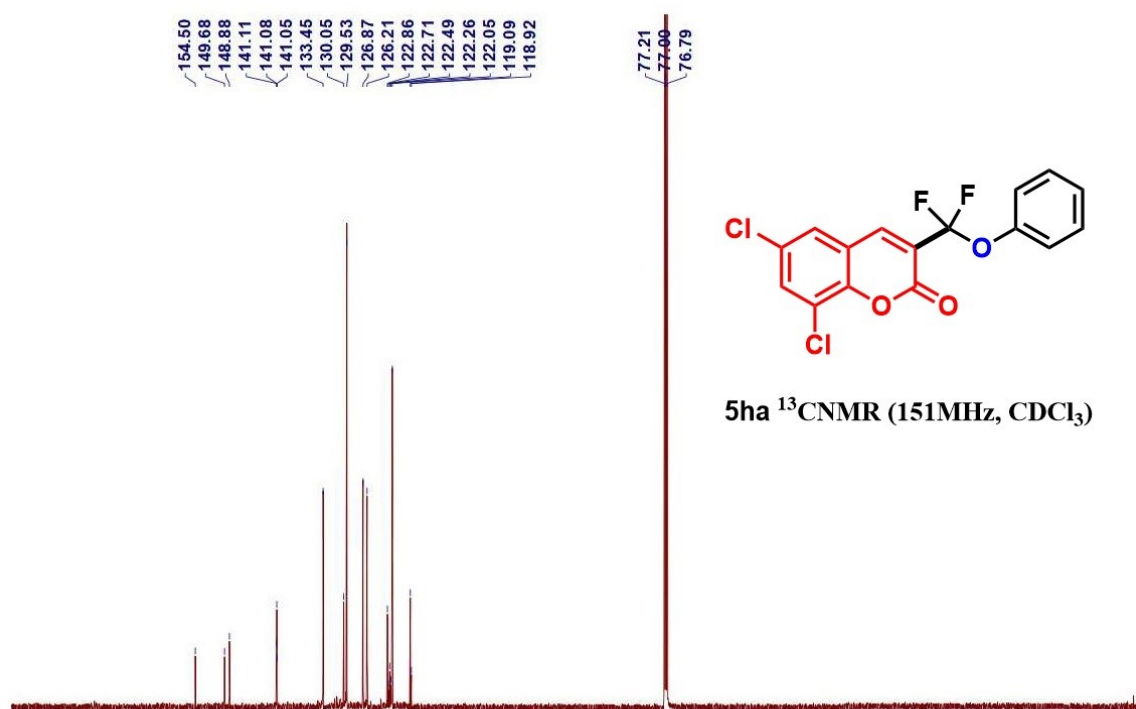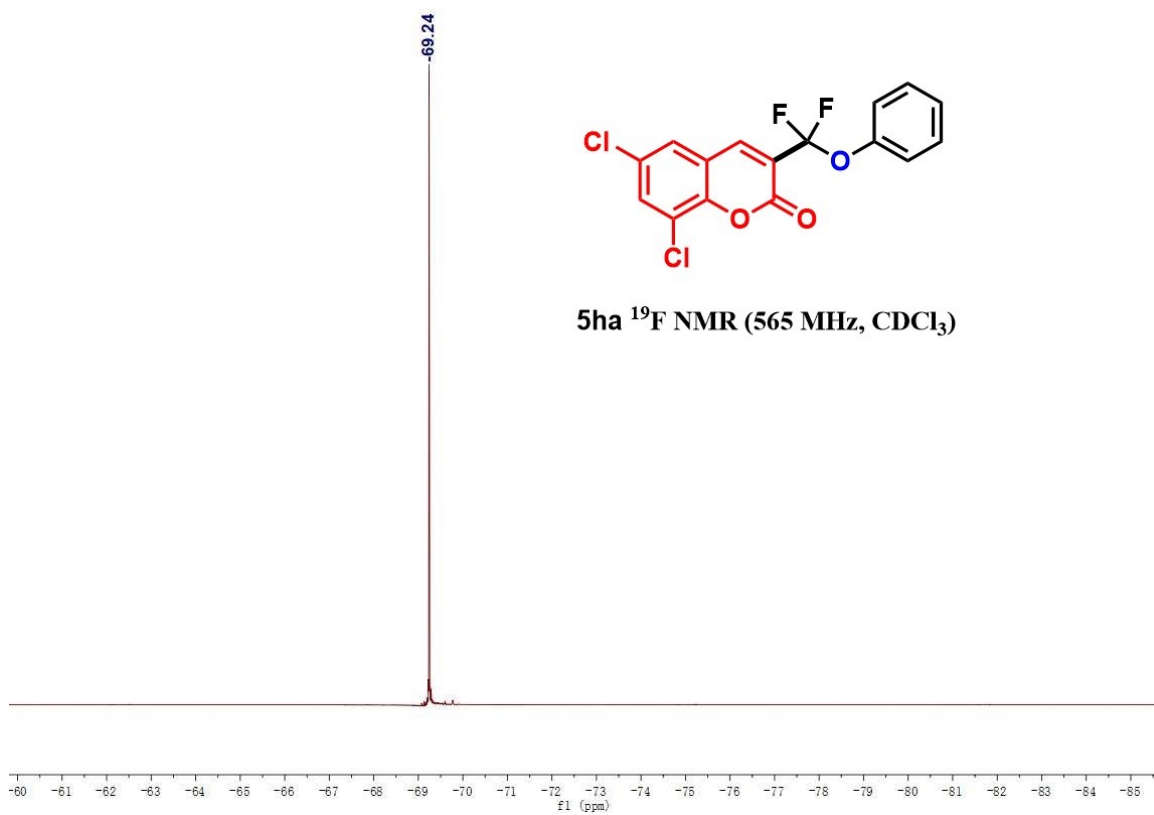

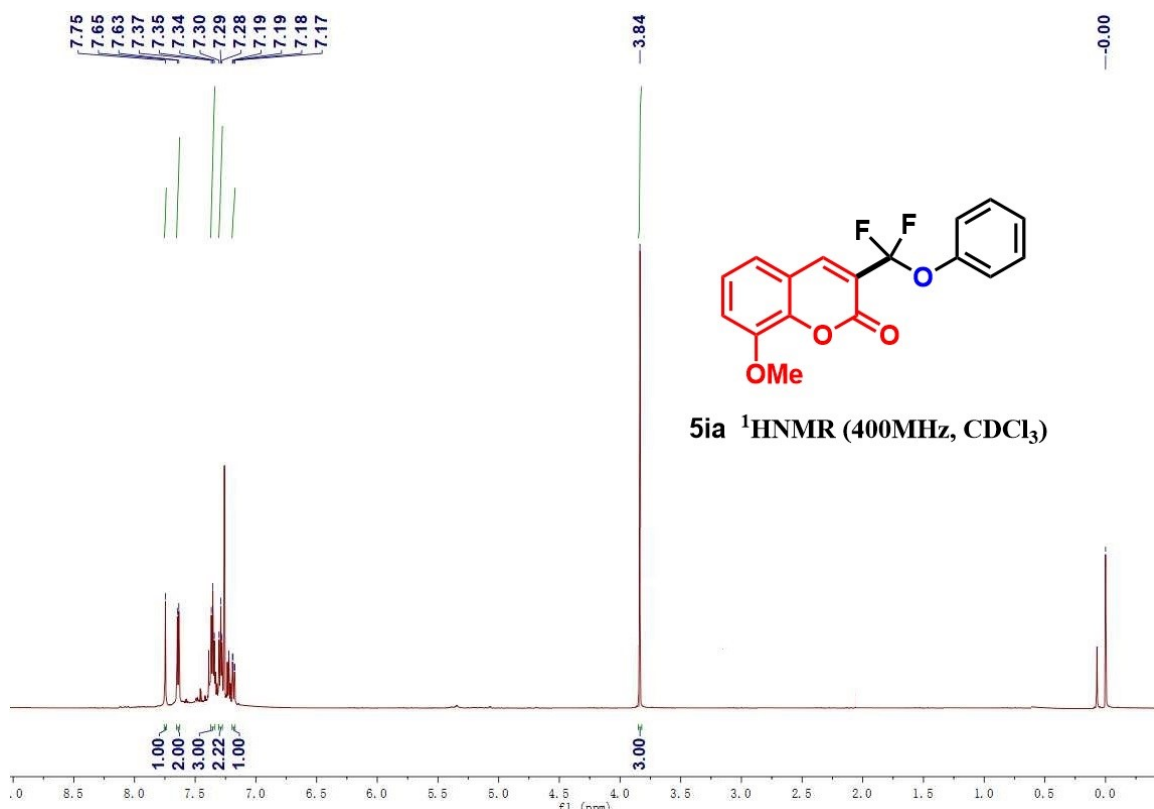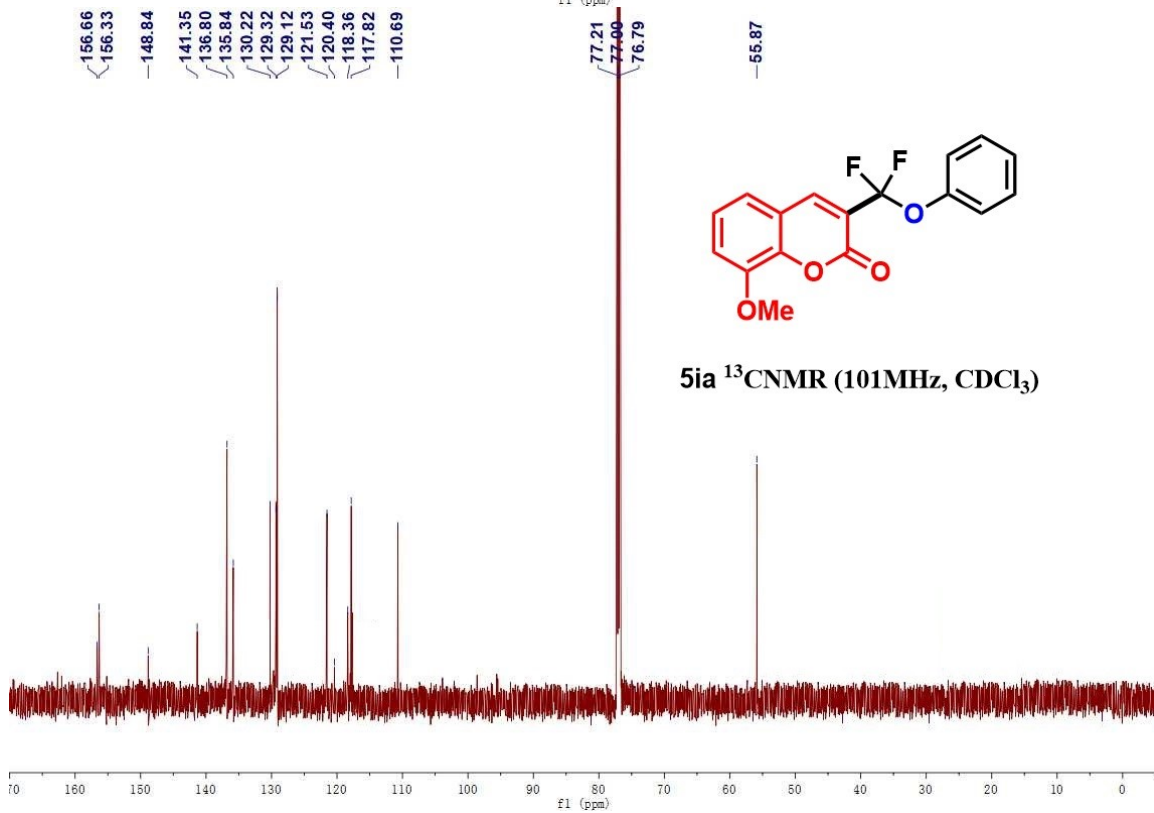

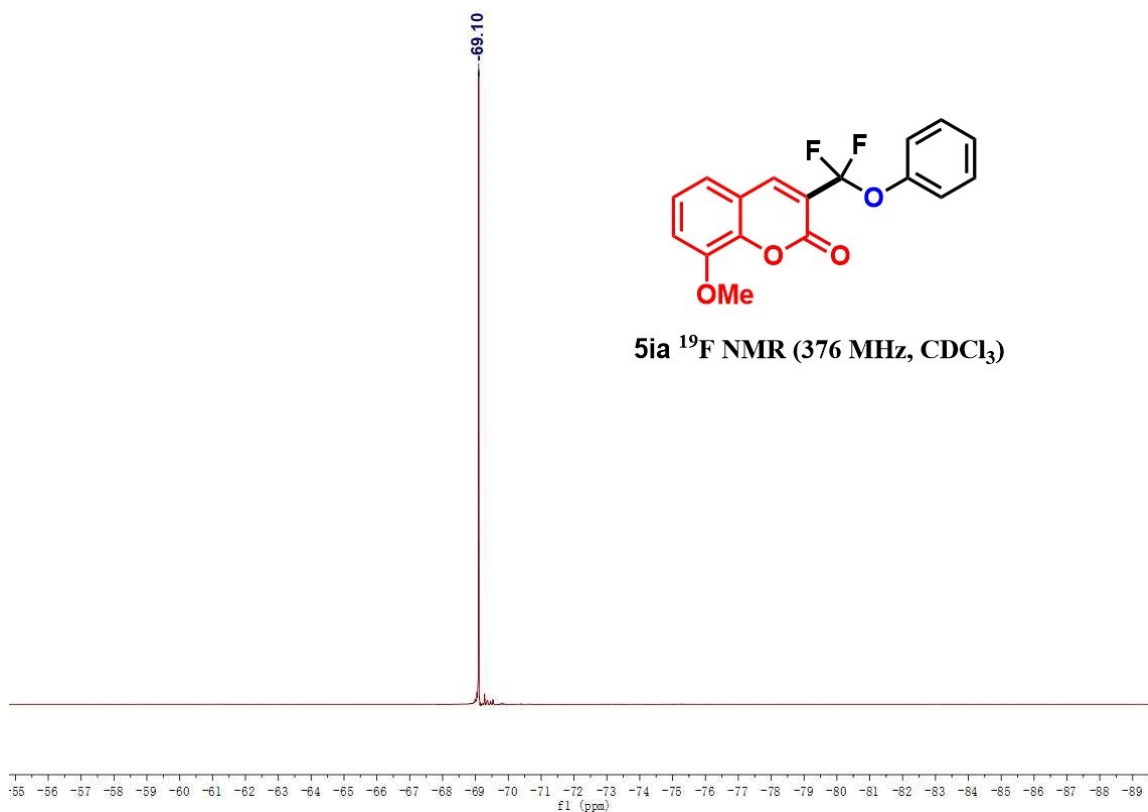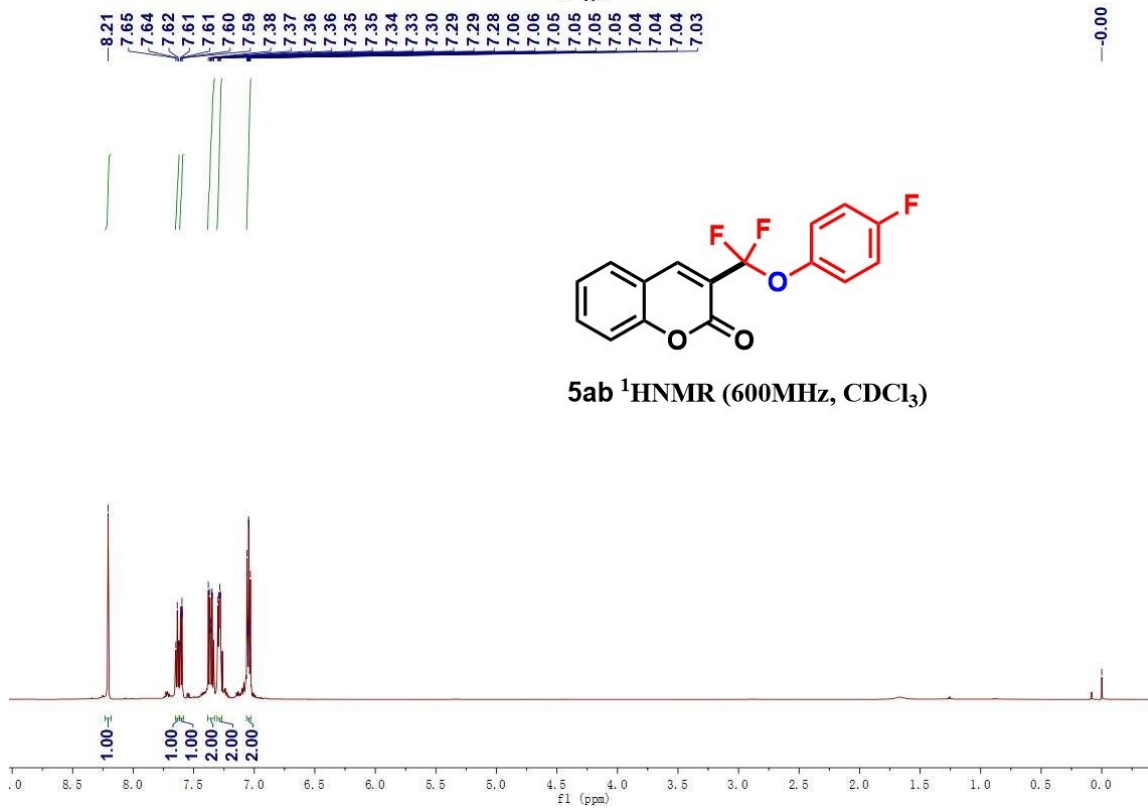

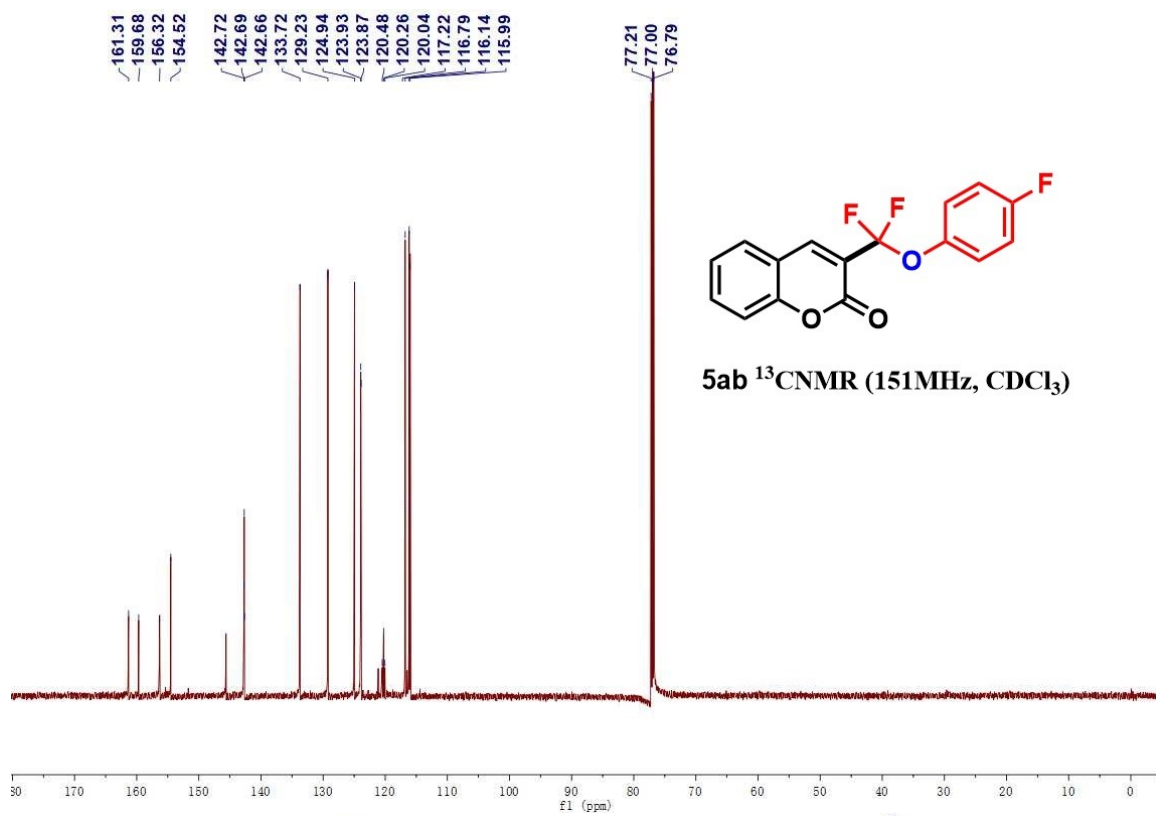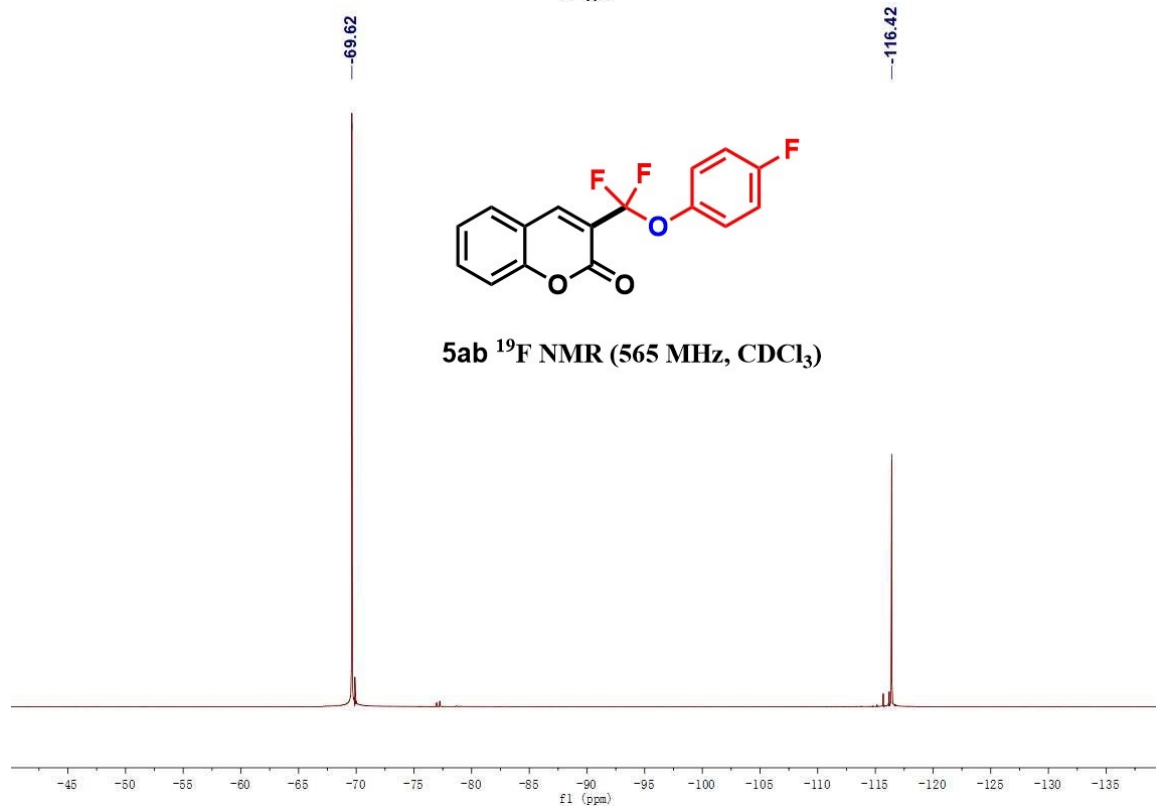

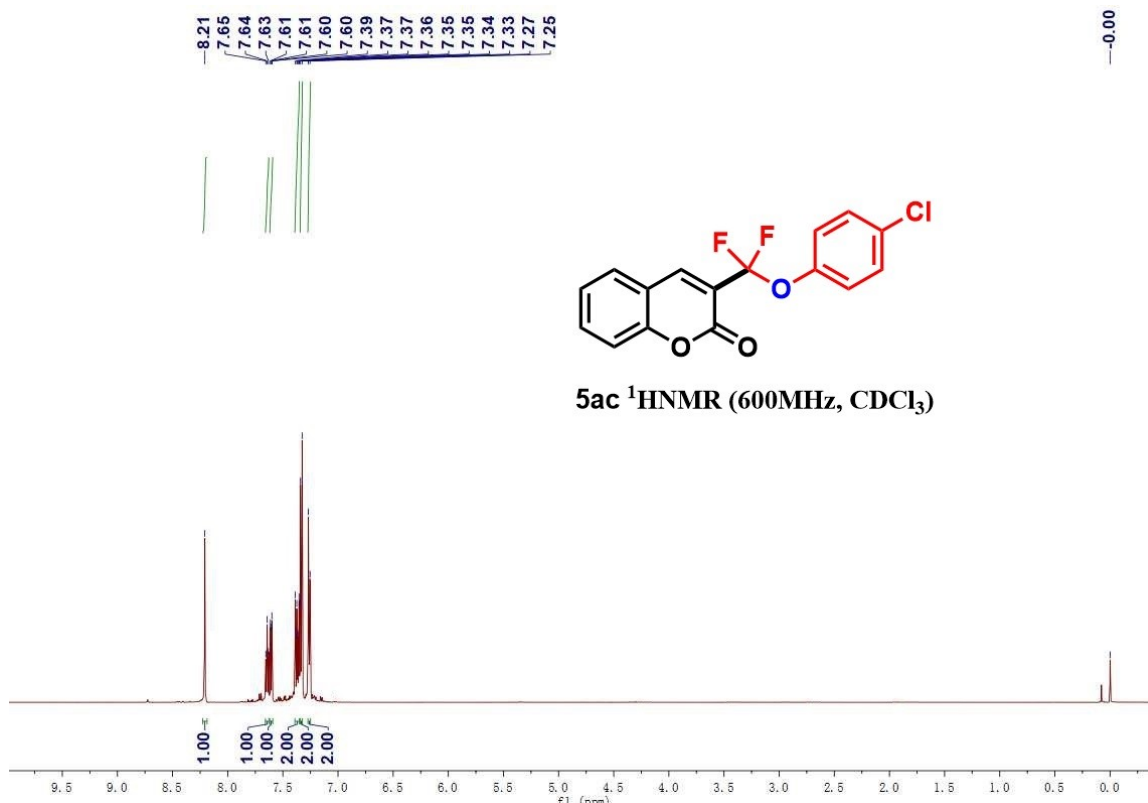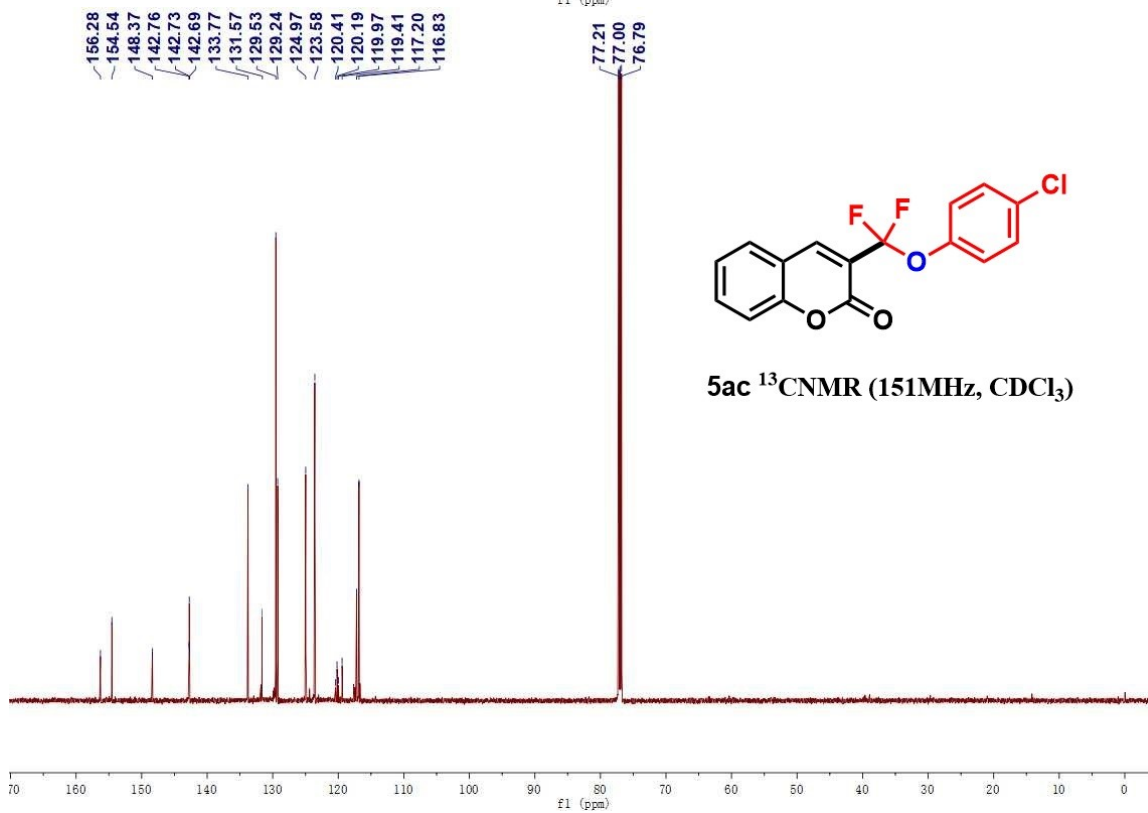

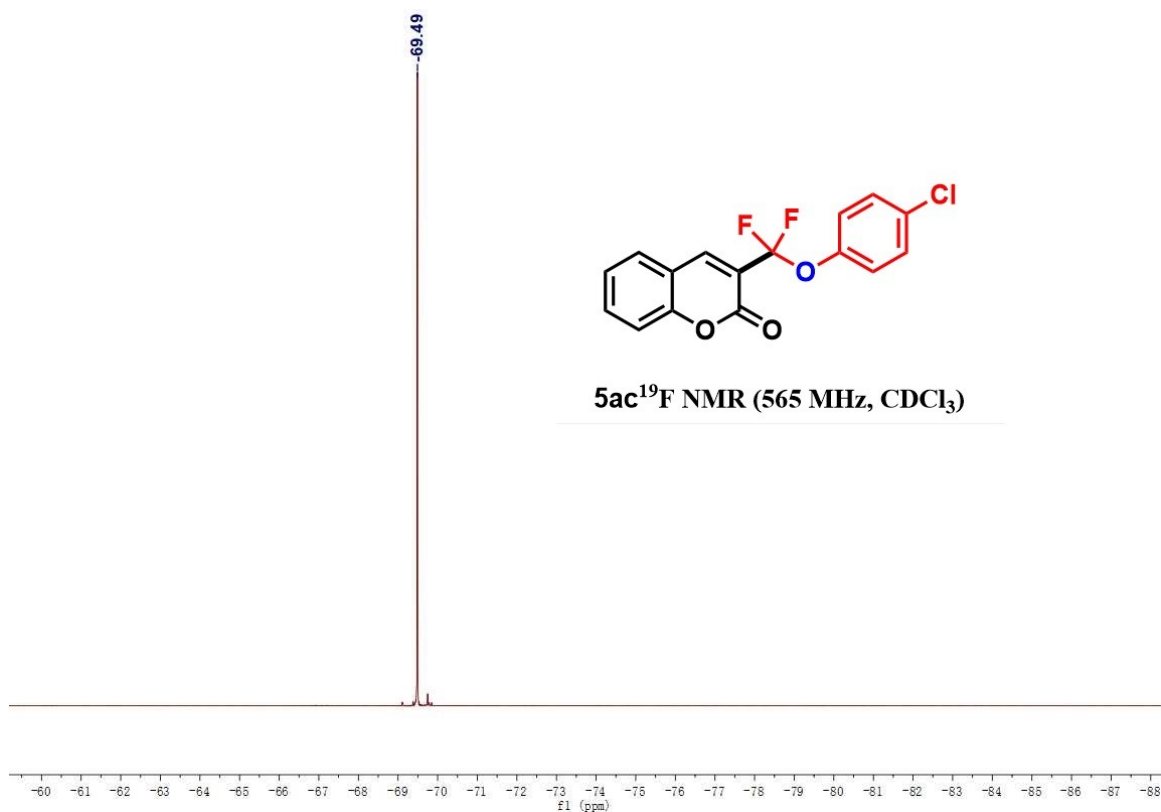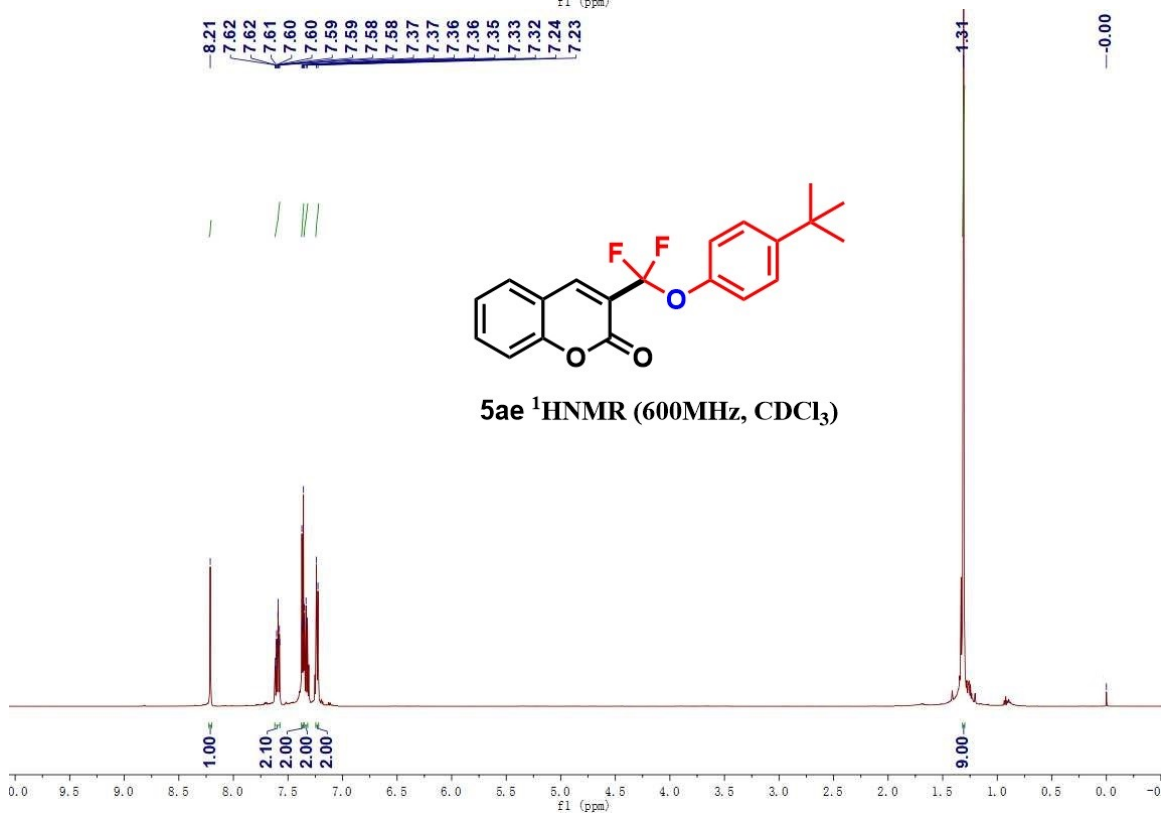

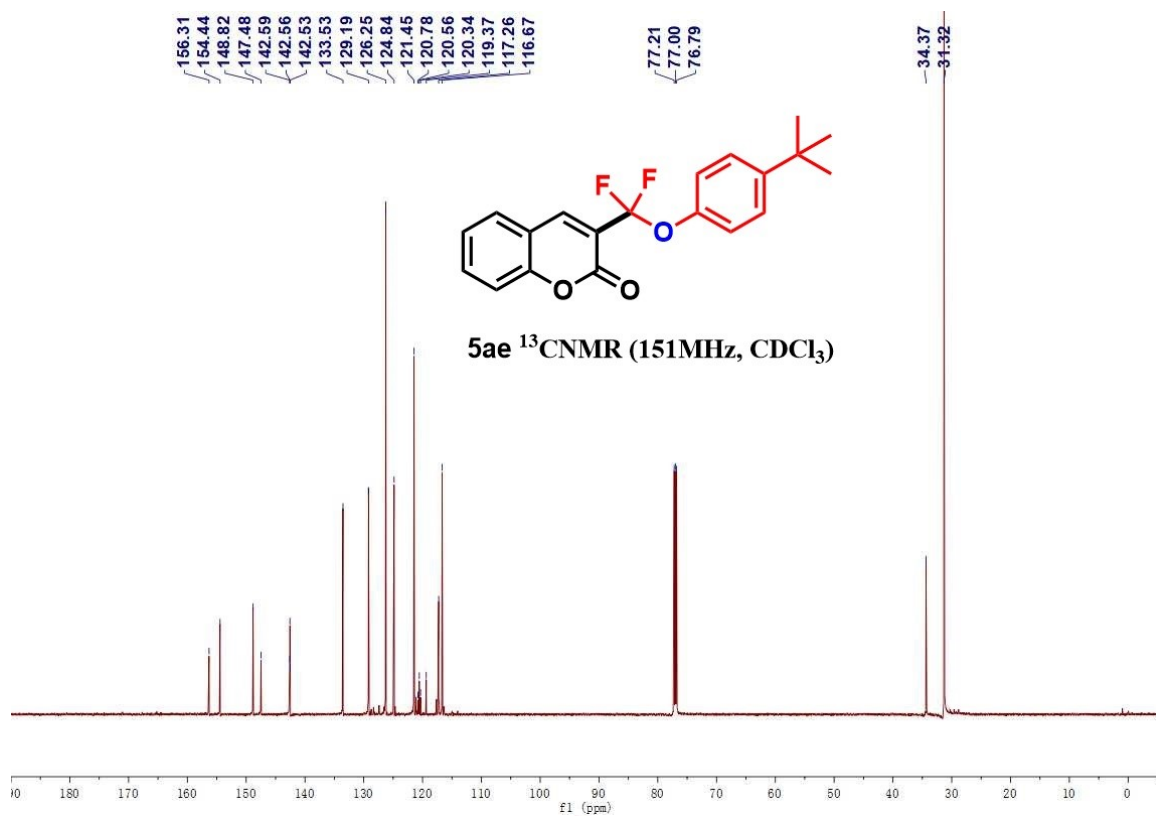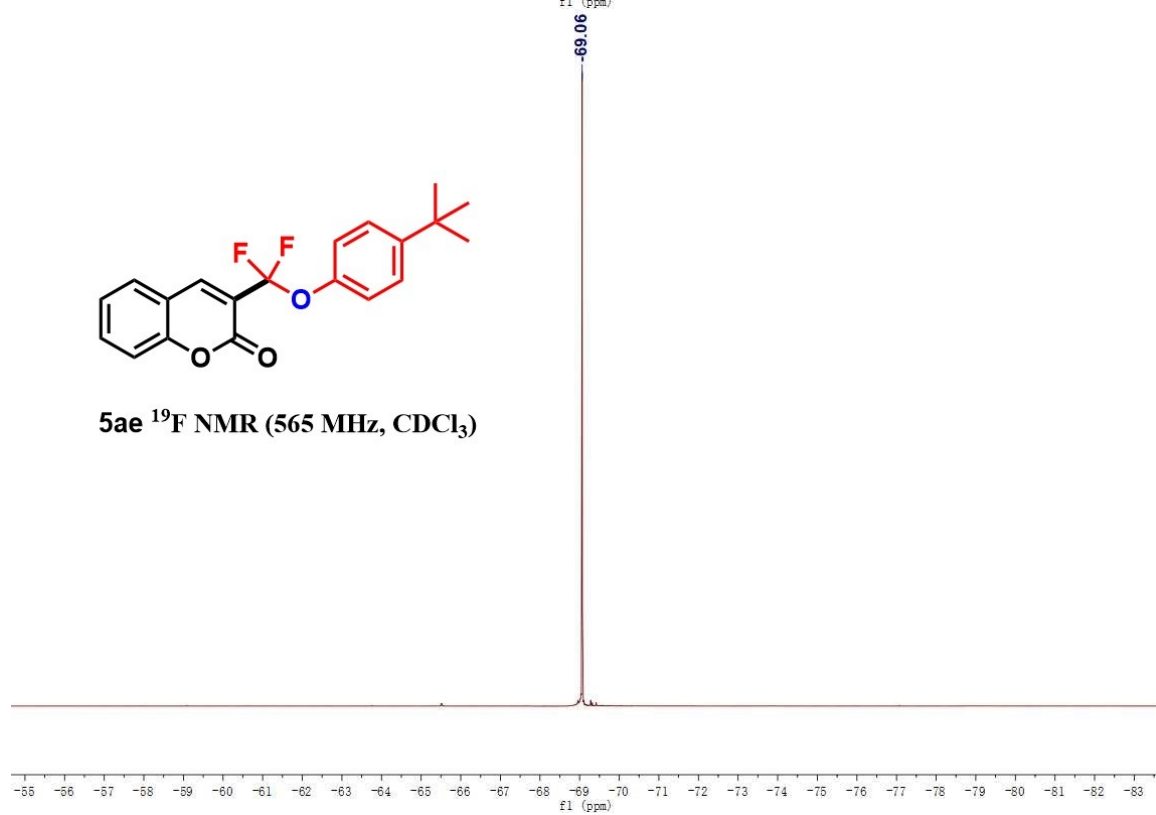

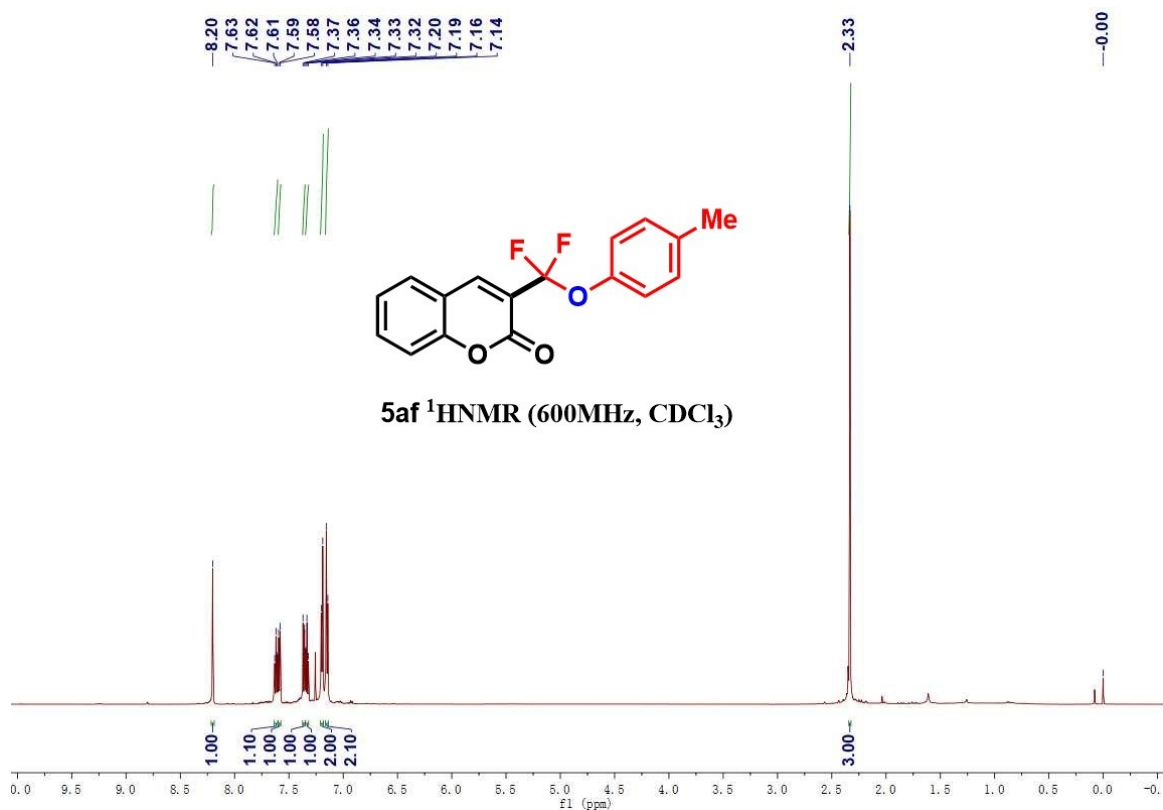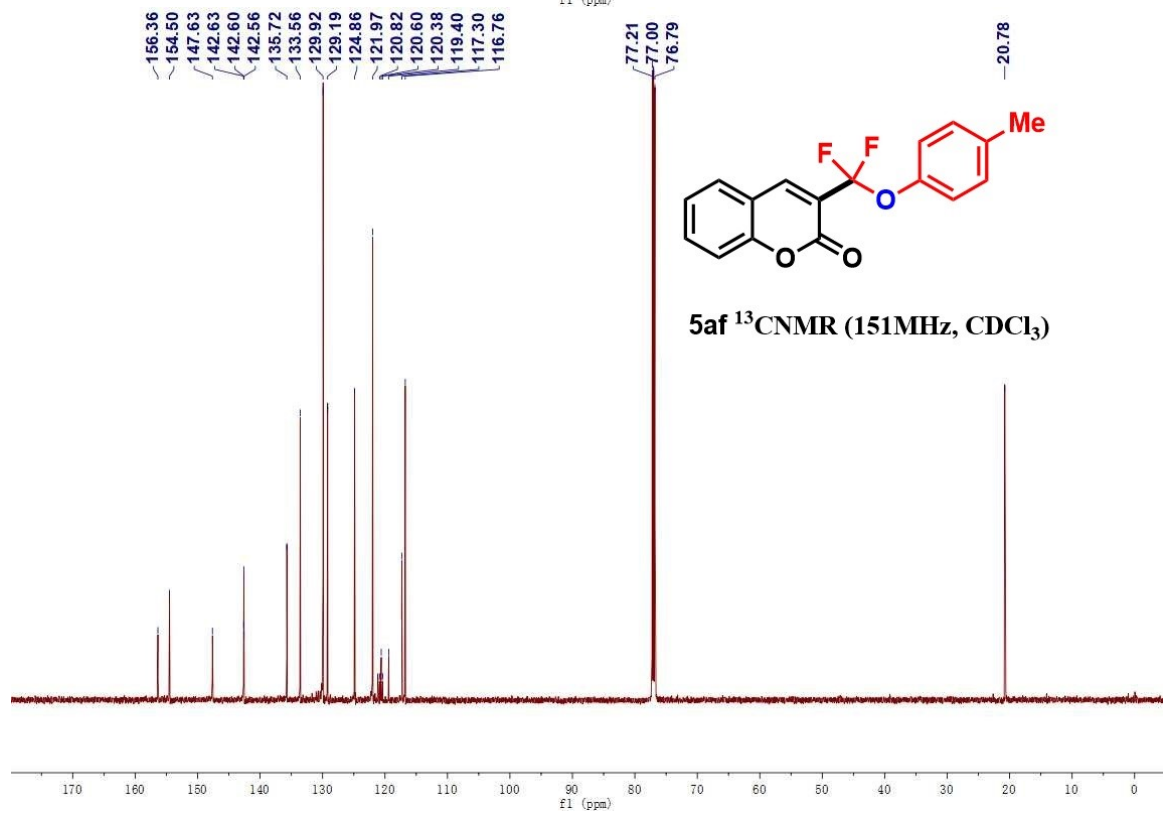

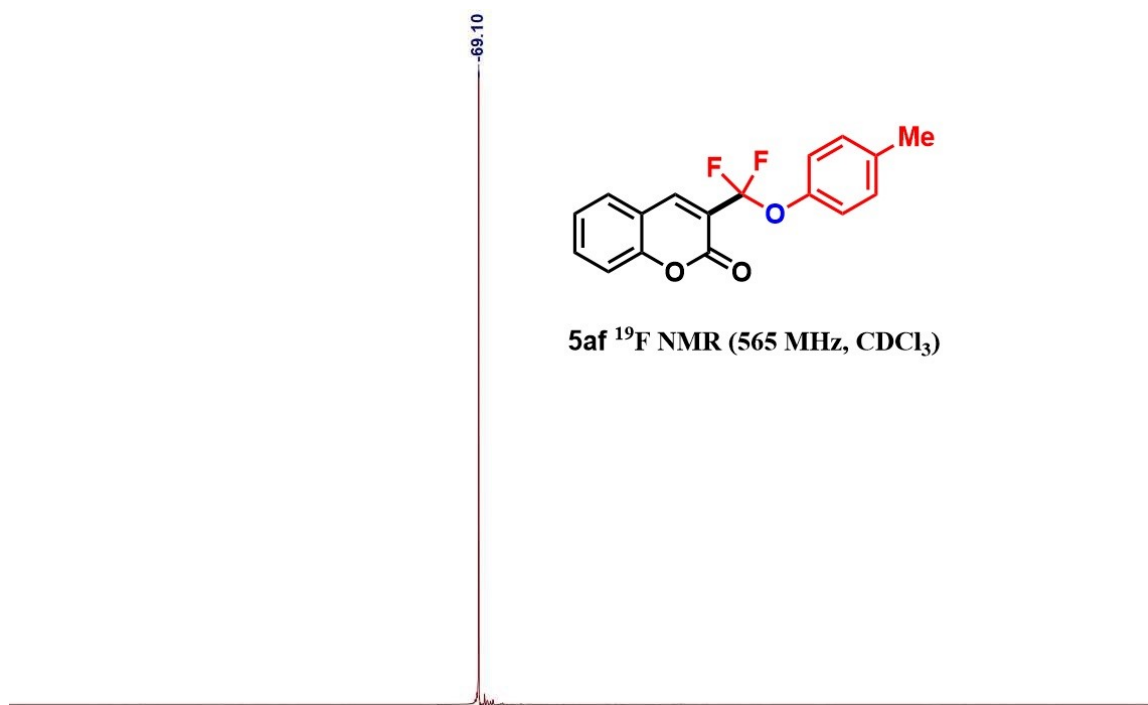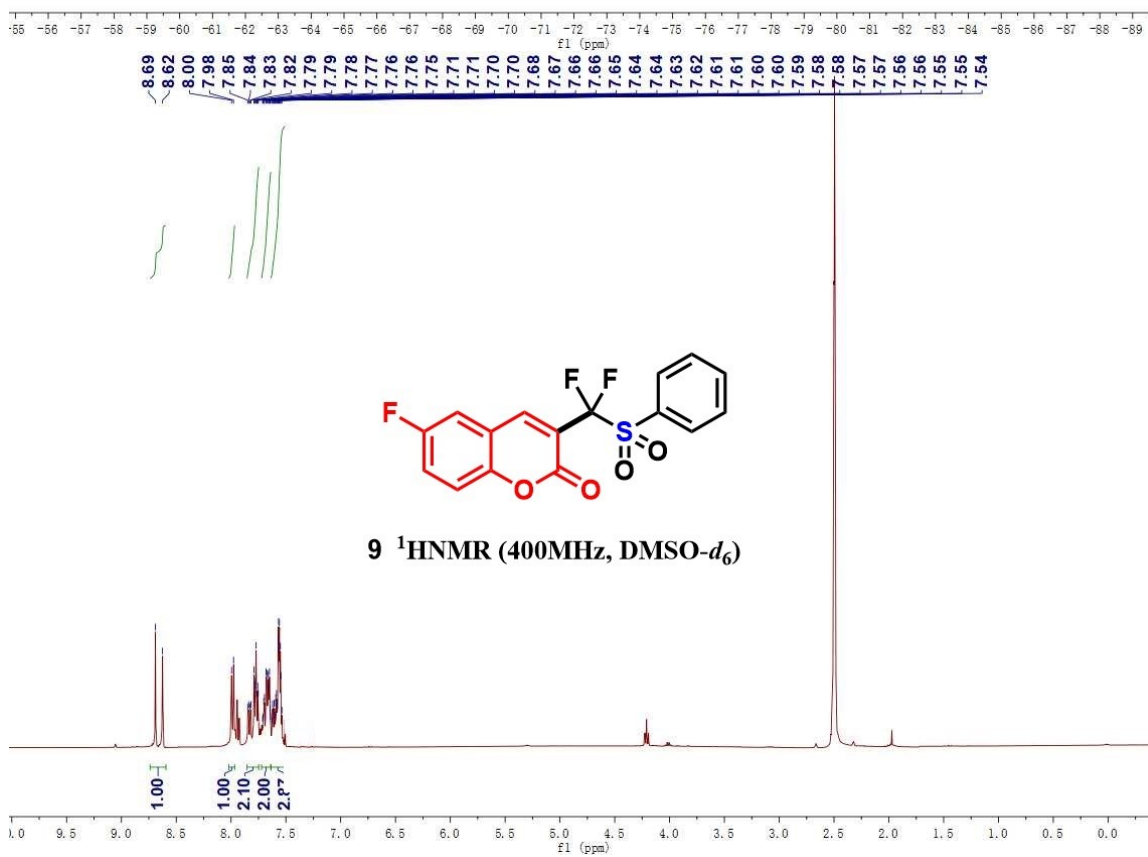

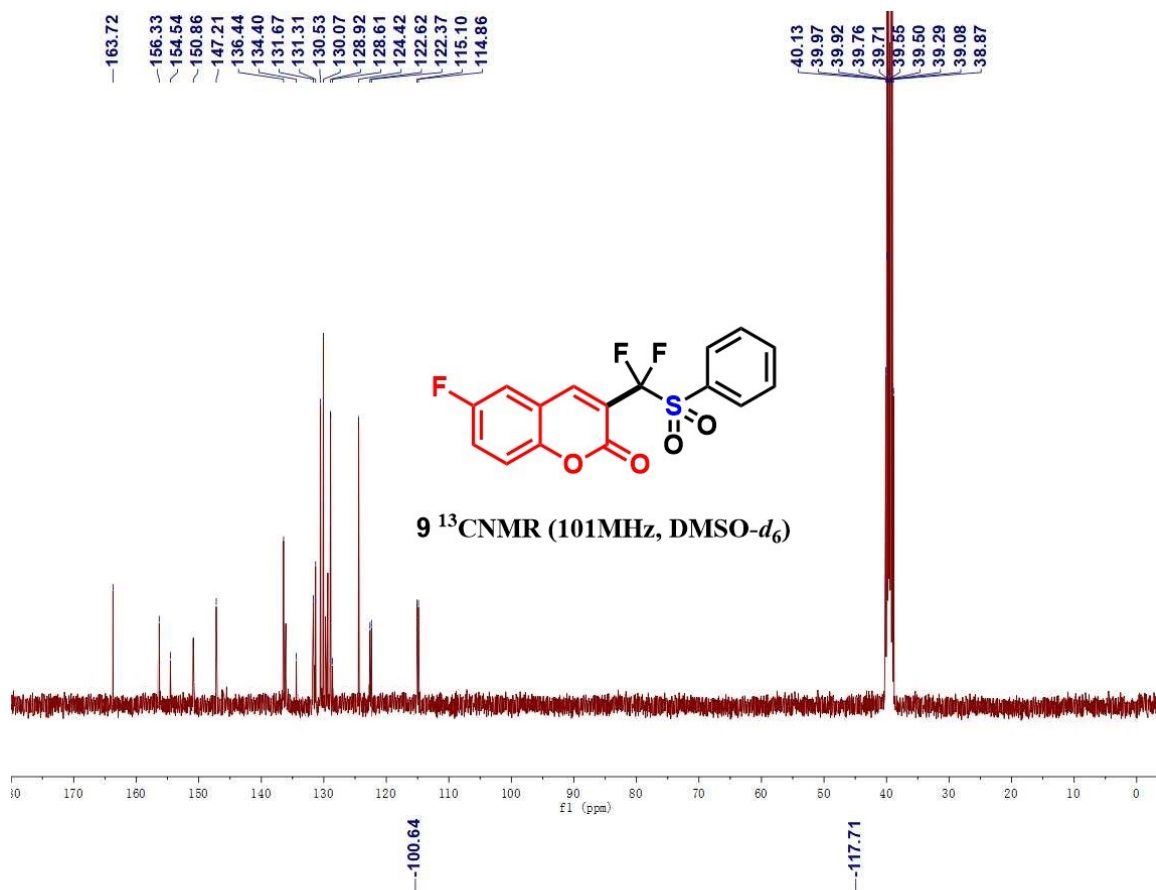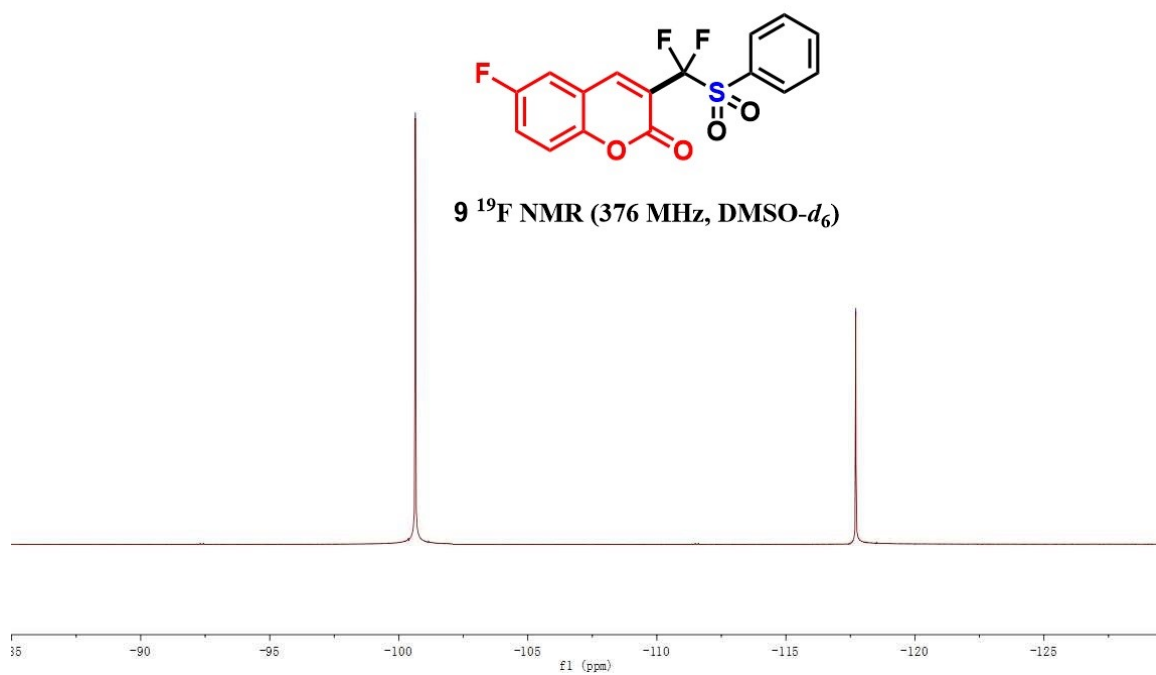

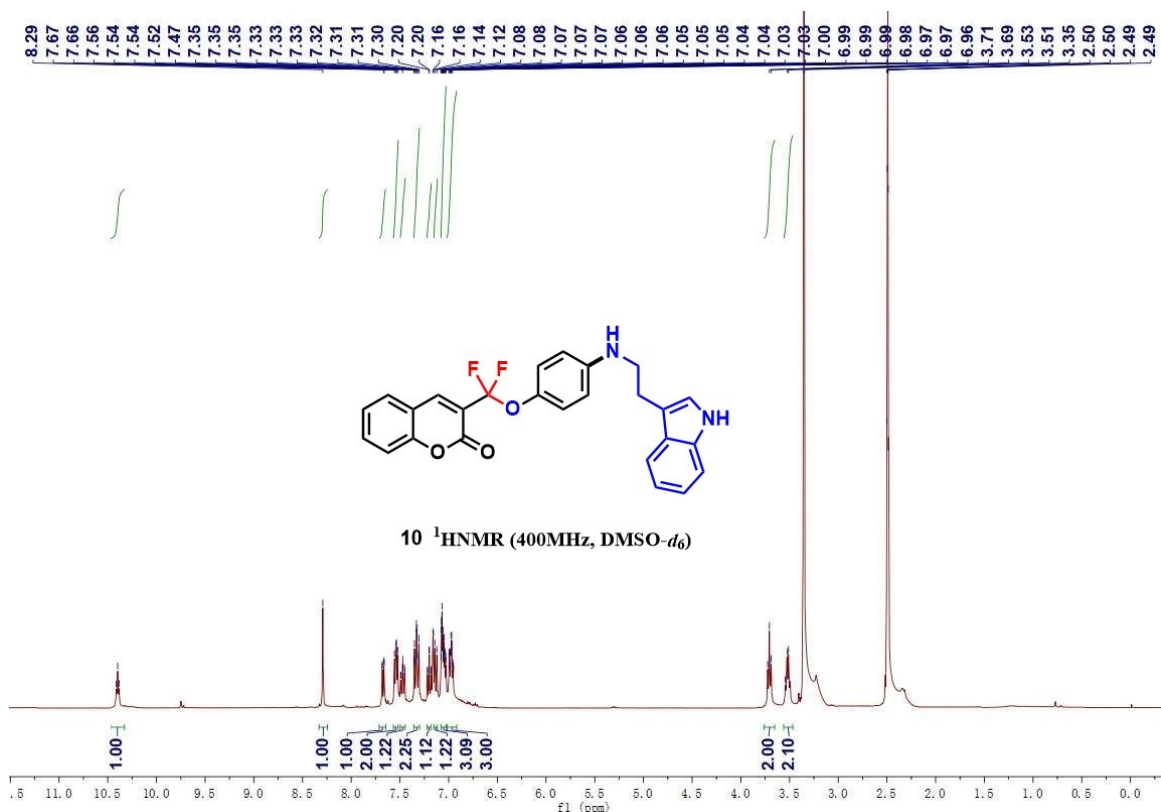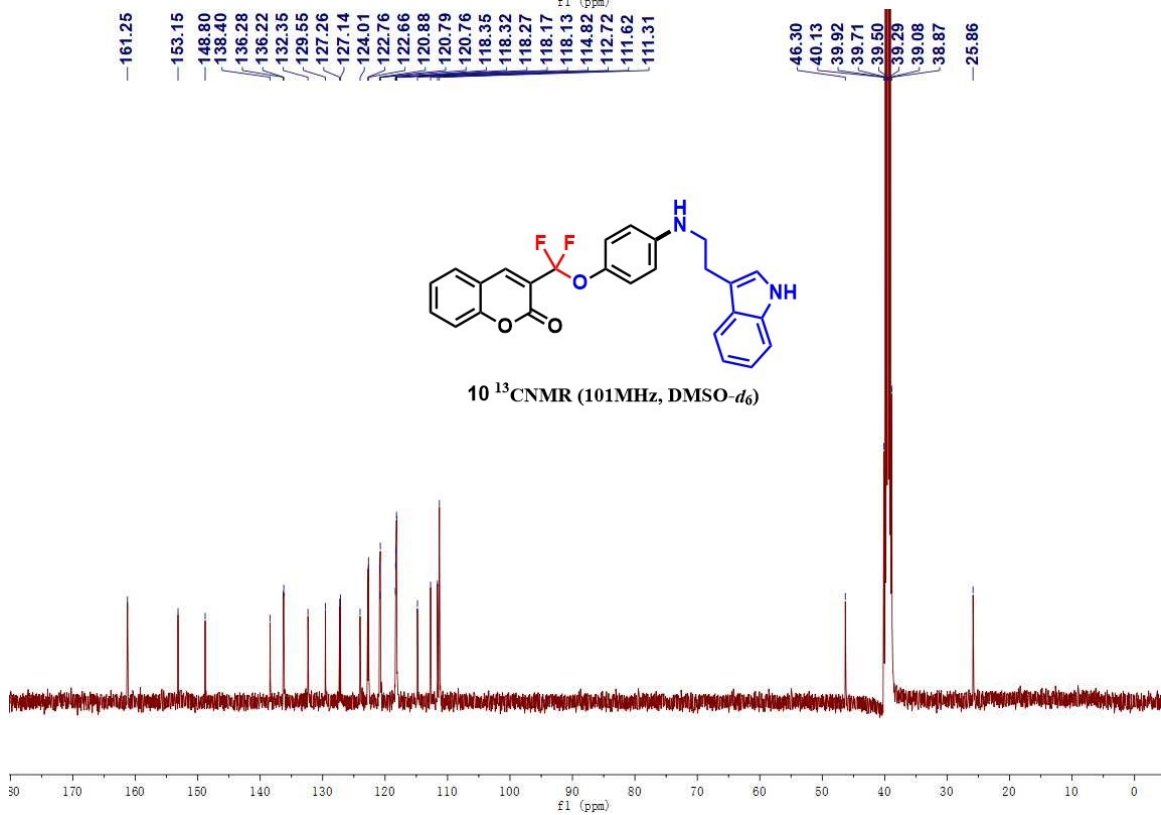

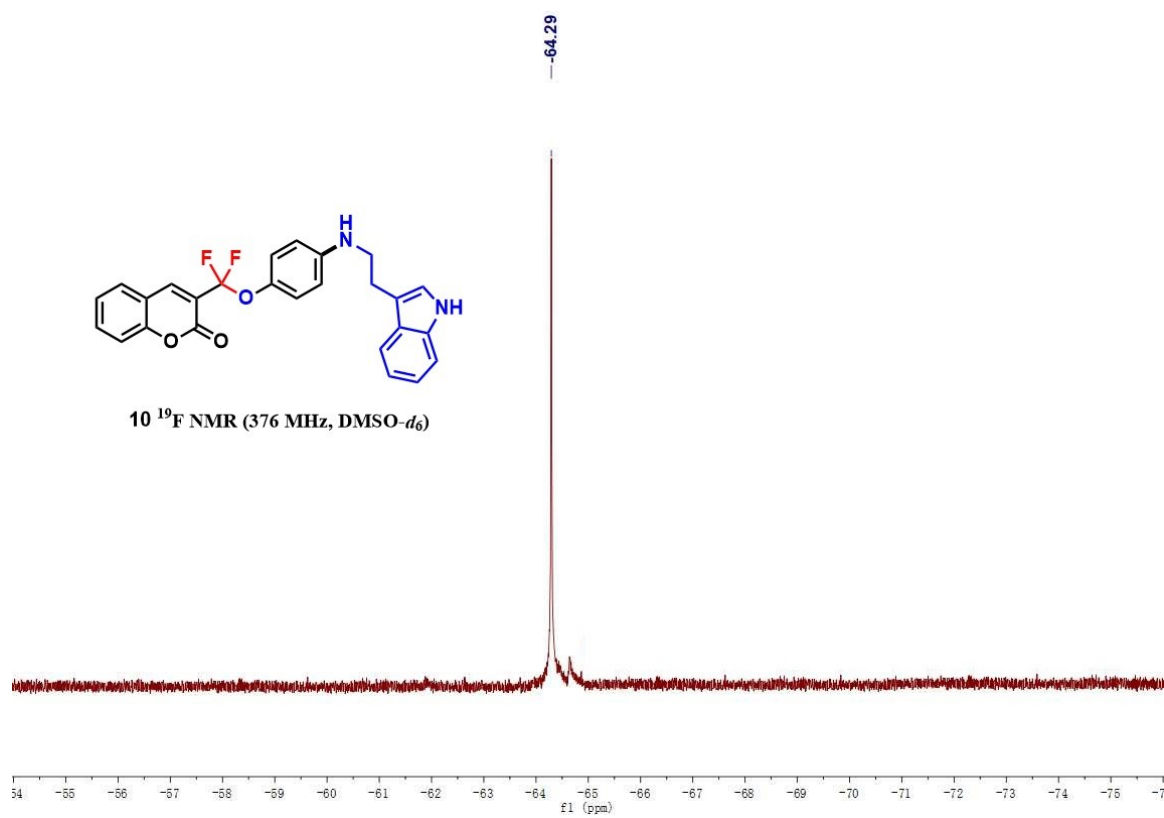

## 6.The HRMS spectra for Compound 8

HRMS (ESI)  $m/z$ :  $[M+H]^+$  calcd for  $C_{16}H_{23}F_2NNaOS$  + 338.1361; found 338.1365.

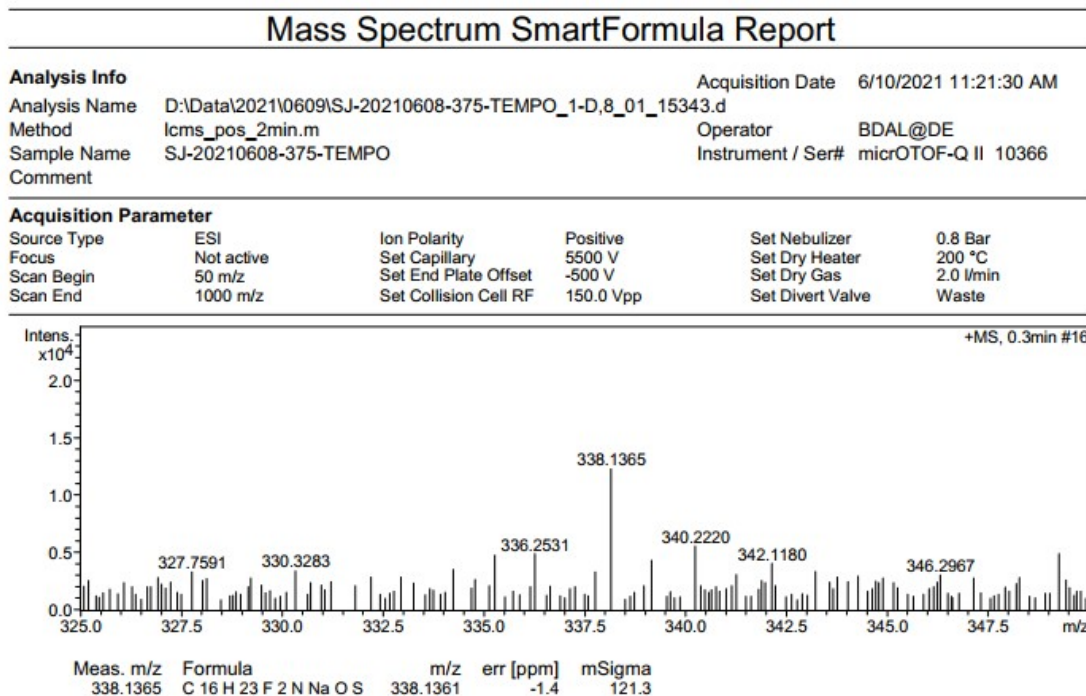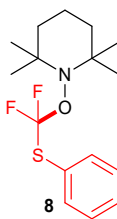

Supplement: d2ob00568a1.pdf [file d2ob00568a1.pdf]
